# Supplementary material for: New Phenylspirodrimanes from the Sponge-Associated Fungus Stachybotrys chartarum MUT 3308
Source: MDPI journal article supplement (doi:10.3390/md21030135), 2023-02-21
Supplement: s1 [file s1]

## Supporting Information

# New phenylspirodrimanes from the Sponge-Associated Fungus *Stachybotrys chartarum* MUT 3308

Marie Dayras <sup>1,2</sup>, Estelle Sfecci <sup>1,2</sup>, Elena Bovio <sup>3,4</sup>, Olivia Rastoin <sup>5</sup>, Maeva Dufies <sup>5</sup>, Fabien Fontaine-Vive <sup>1,2</sup>, Elisabeth Taffin-de-Givenchy <sup>1,2</sup>, Thierry Lacour <sup>6</sup>, Gilles Pages <sup>2,5,7</sup>, Giovanna Cristina Varese <sup>3</sup> and Mohamed Mehiri <sup>1,2\*</sup>

<sup>1</sup> Marine Natural Products Team, Institut de Chimie de Nice, Université Côte d'Azur, CNRS UMR 7272, 06108 Nice, France; marie.dayras@univ-cotedazur.fr (M.D.); estelle.sfecci@unice.fr (E.S.); mohamed.mehiri@univ-cotedazur.fr (M.M.); fabien.fontaine-vive@univ-cotedazur.fr (F.F.V.); elisabeth.taffin-de-givenchy@univ-cotedazur.fr (E.T.G.)

<sup>2</sup> LIA ROPSE, Laboratoire International Associé, Université Côte d'Azur - Centre Scientifique de Monaco, Nice, France

<sup>3</sup> Mycotheca Universitatis Taurinensis, Department of Life Sciences and Systems Biology, University of Turin, Viale Mattioli 25, 10125 Turin, Italy; elena.bovio@inrae.fr (E.B.); cristina.varese@unito.it (G.C.V.)

<sup>4</sup> UMR Institut Sophia Agrobiotech, INRAE, CNRS, UCA, 400 routes des Chappes, 06903 Sophia Antipolis, France

<sup>5</sup> Institute for Research on Cancer and Aging of Nice, Université Côte d'Azur, CNRS UMR 7284, INSERM U1081, Centre Antoine Lacassagne, 06189 Nice, France; olivia.rastoin@univ-cotedazur.fr (O.R.); maeva.dufies@univ-cotedazur.fr (M.Du.); gilles.pages@univ-cotedazur.fr (G.P.)

<sup>6</sup> Parc d'activités ArômeGrasse/Immeuble GrasseBiotech, 45 boulevard Marcel Pagnol, 06130 Grasse, France; tlacour@biopreserv.fr (T.L.)

<sup>7</sup> Department of Biomedical, Centre Scientifique de Monaco, Monaco, Principality of Monaco

\* Correspondence: mohamed.mehiri@univ-cotedazur.fr; Tel.: +33 4 89 15 01 57 (M.M.)

### 1. Experimental spectra

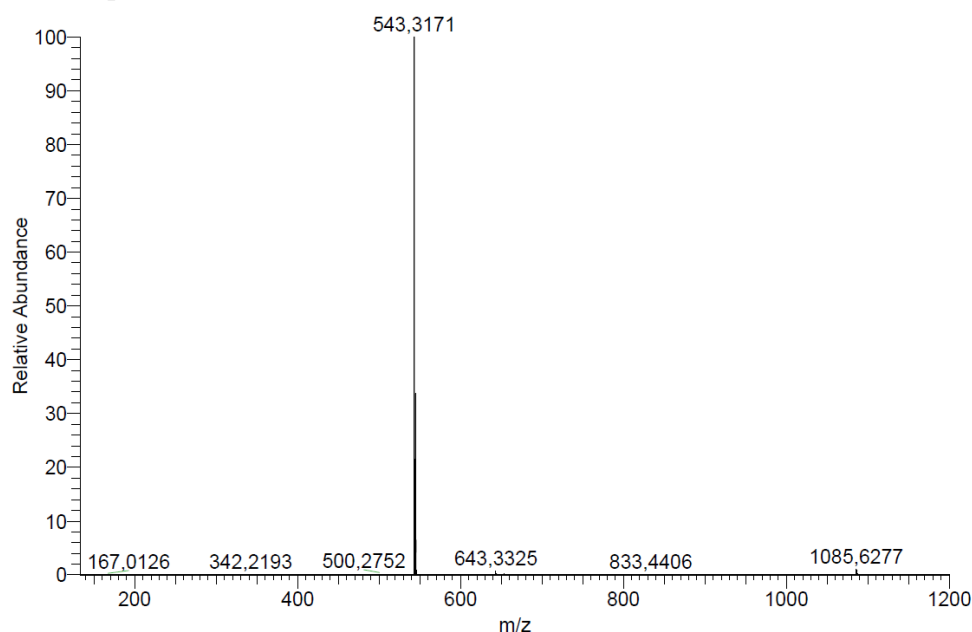

Figure S1. HRESI(+)MS spectrum of stachybotrin J (1).

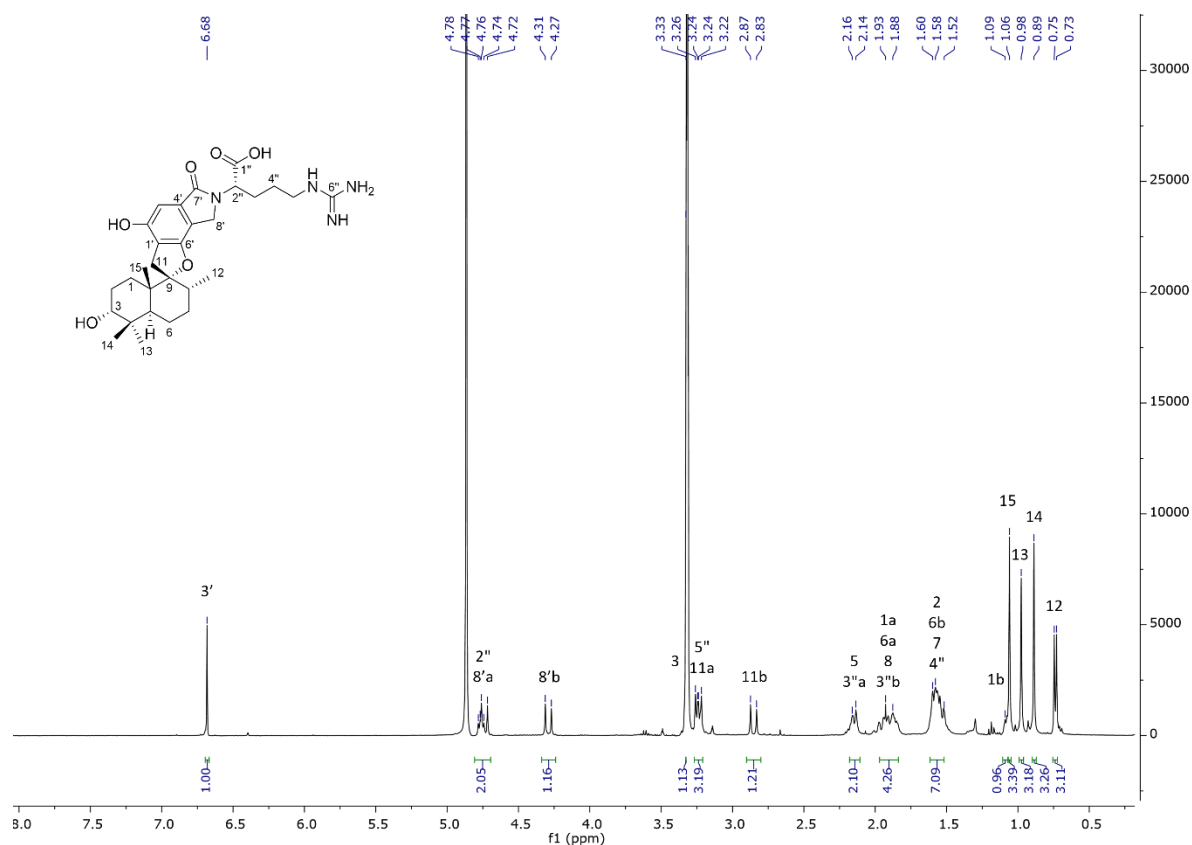

Figure S2.  $^1\text{H}$  NMR spectrum (500 MHz,  $\text{CD}_3\text{OD}$ ) of stachybotrin J (1).

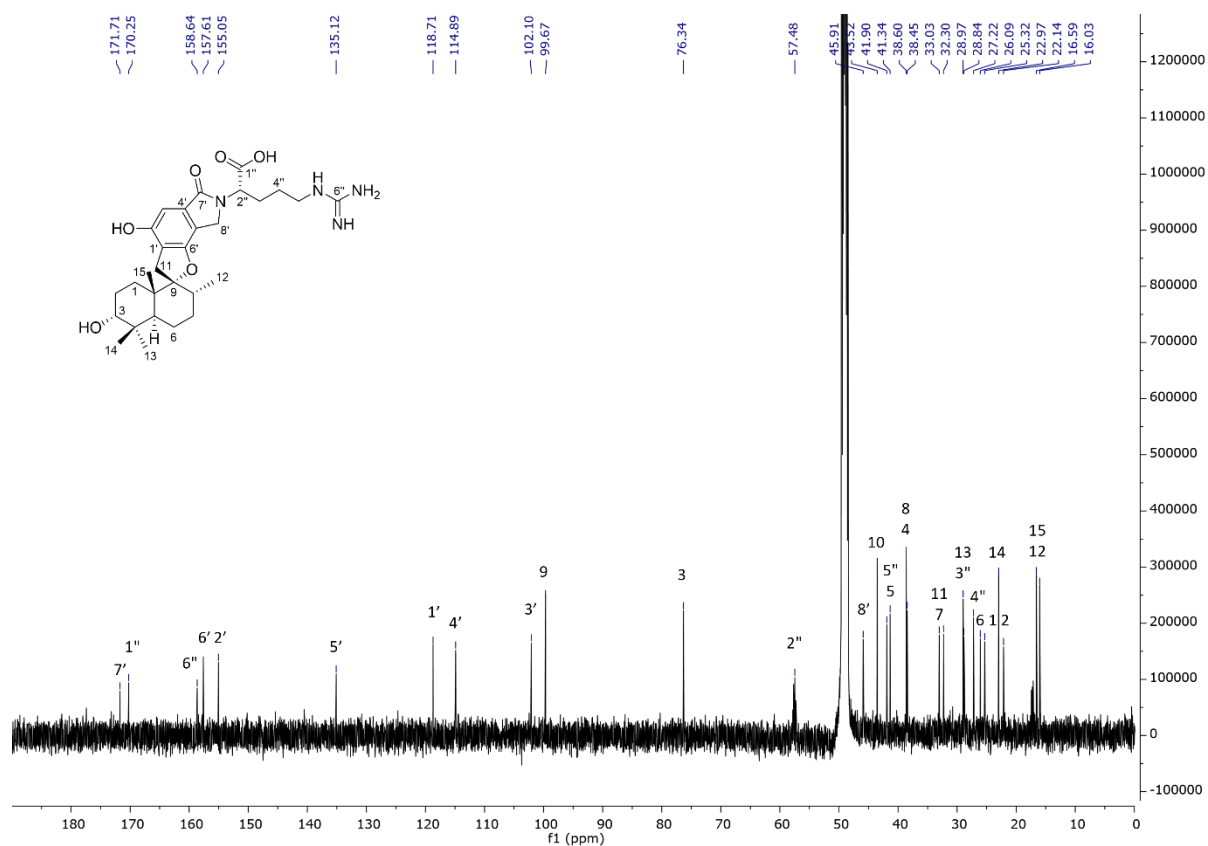

Figure S3.  $^{13}\text{C}$  NMR spectrum (125 MHz,  $\text{CD}_3\text{OD}$ ) of stachybotrin J (1).

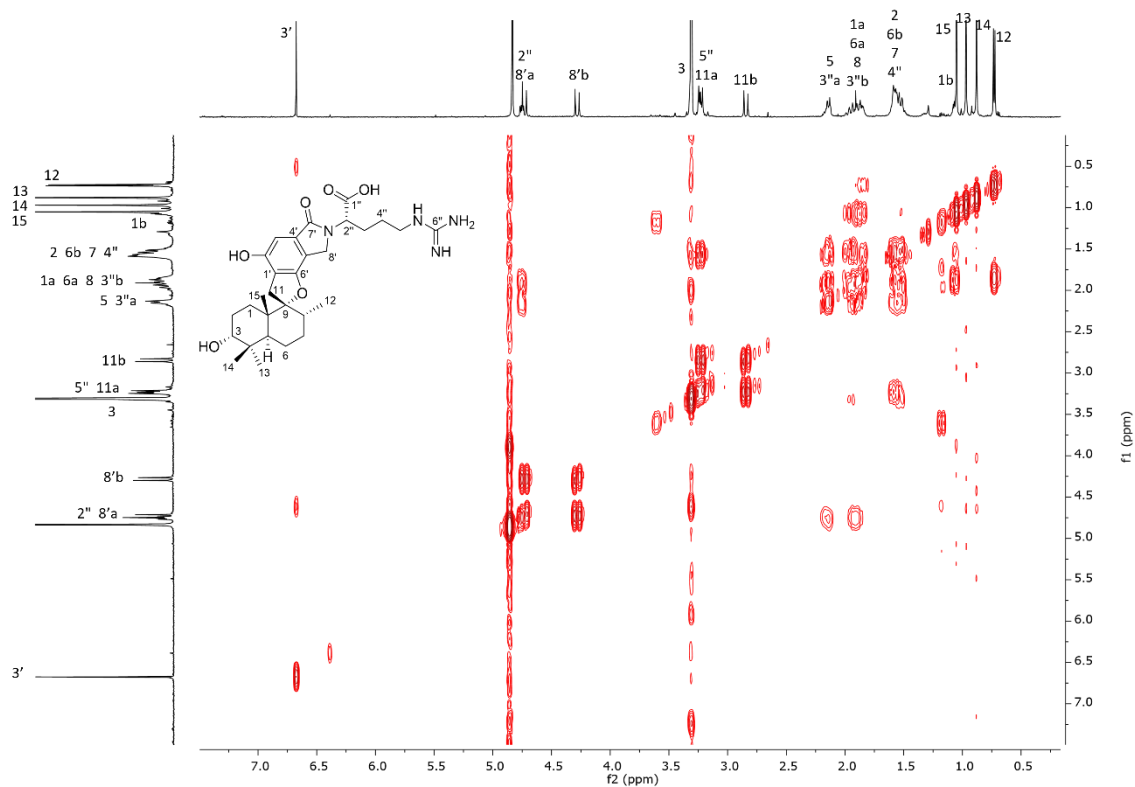

Figure S4.  $^1\text{H}$ - $^1\text{H}$  COSY NMR spectrum (500/500 MHz,  $\text{CD}_3\text{OD}$ ) of stachybotrin J (**1**).

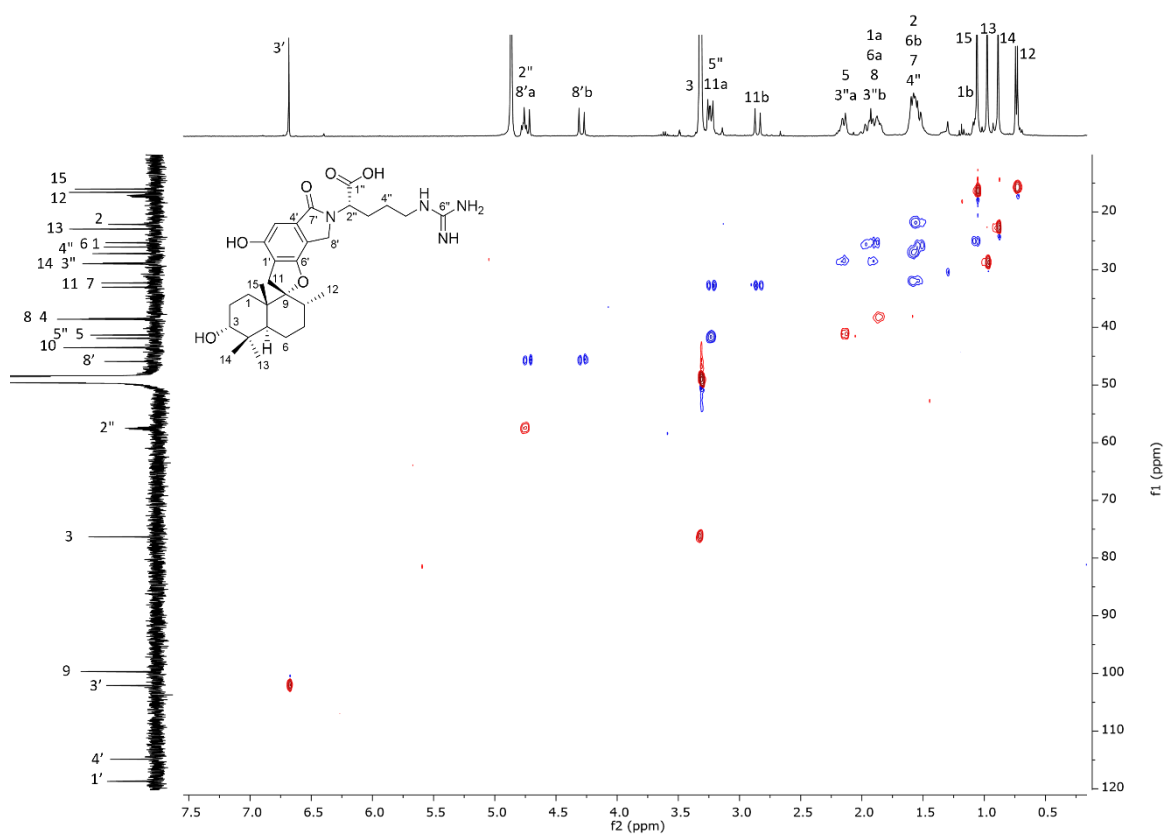

Figure S5.  $^1\text{H}$ - $^{13}\text{C}$  HSQC NMR spectrum (500/125 MHz,  $\text{CD}_3\text{OD}$ ) of stachybotrin J (**1**).

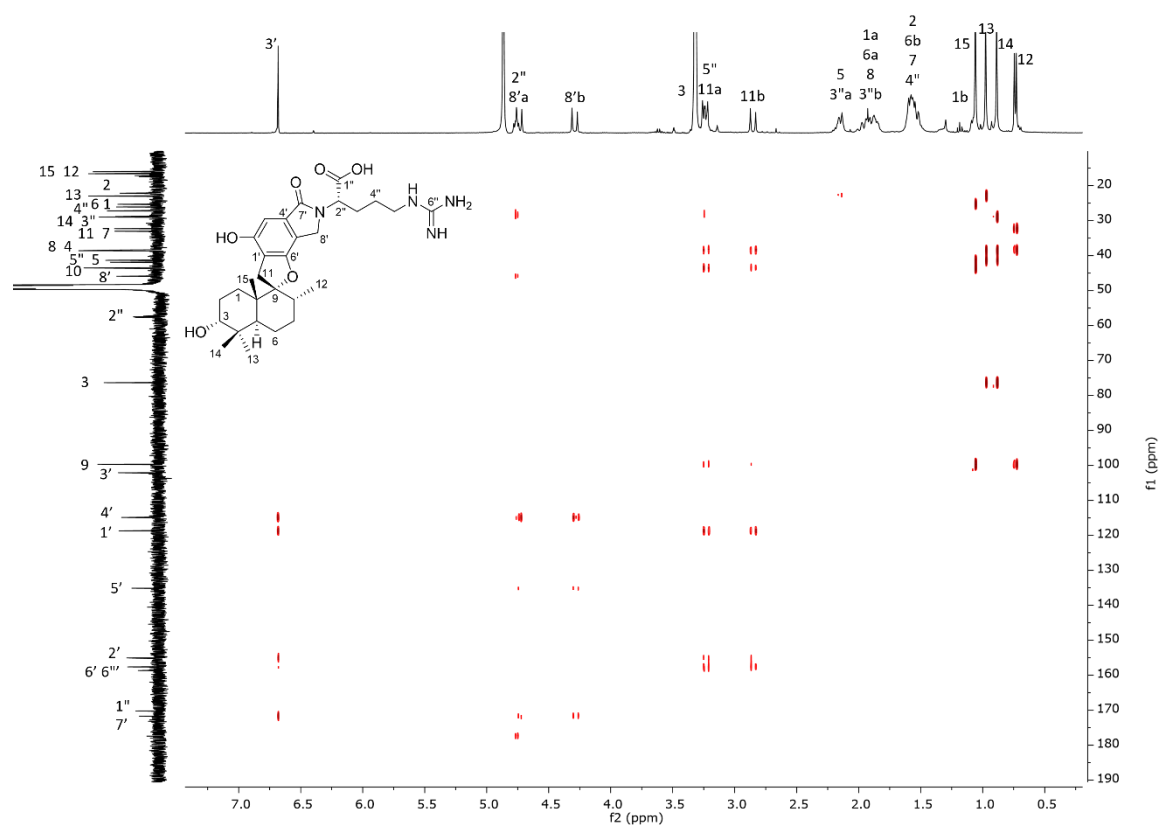

Figure S6.  $^1\text{H}$ - $^{13}\text{C}$  HMBC NMR spectrum (500/125 MHz,  $\text{CD}_3\text{OD}$ ) of stachybotrin J (1).

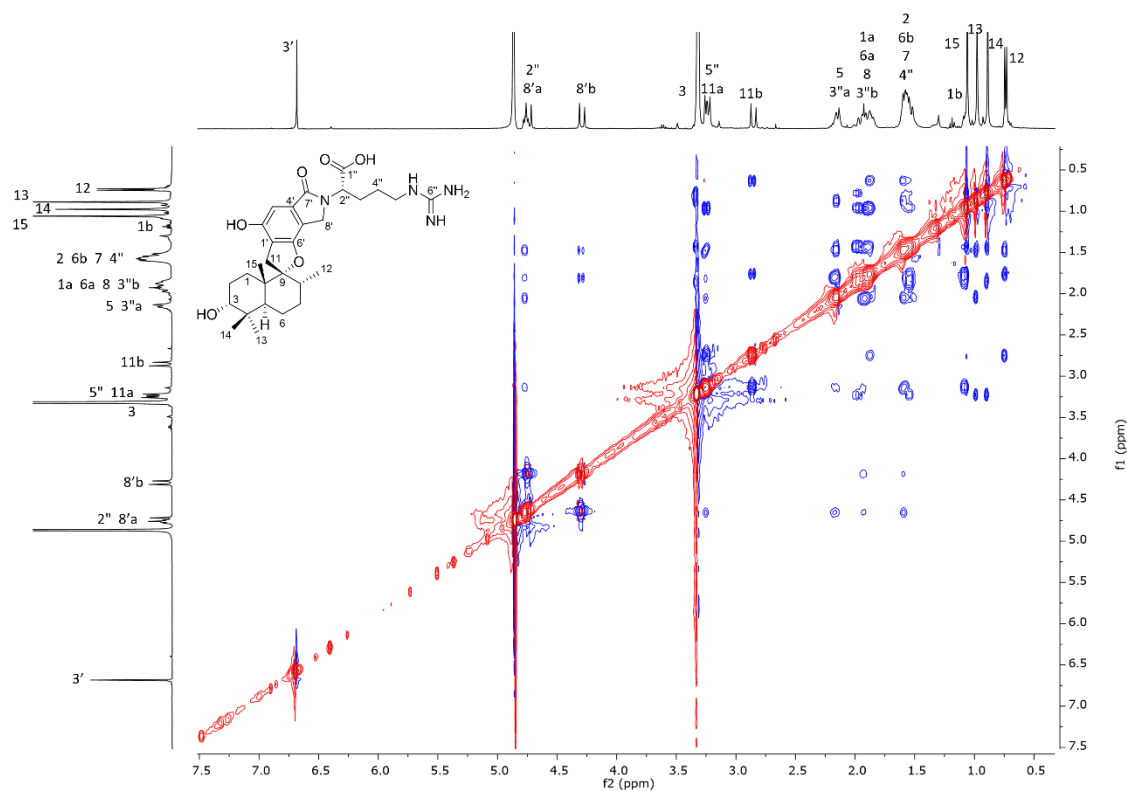

Figure S7.  $^1\text{H}$ - $^1\text{H}$  NOESY NMR spectrum (500/500 MHz,  $\text{CD}_3\text{OD}$ ) of stachybotrin J (1).

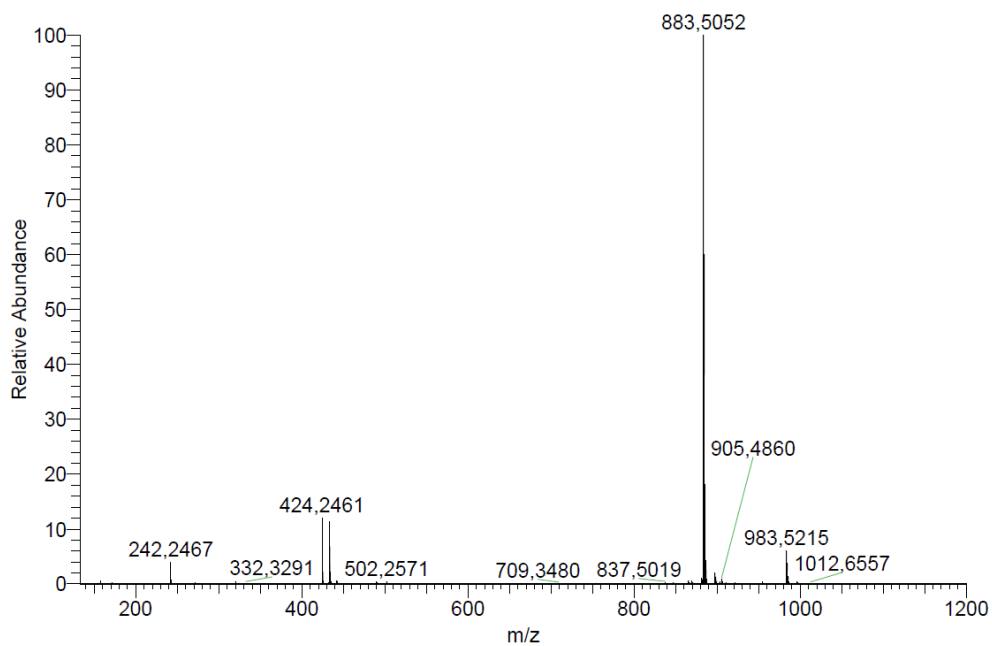

Figure S8. HRESI(+)-MS spectrum of stachylocin G (2).

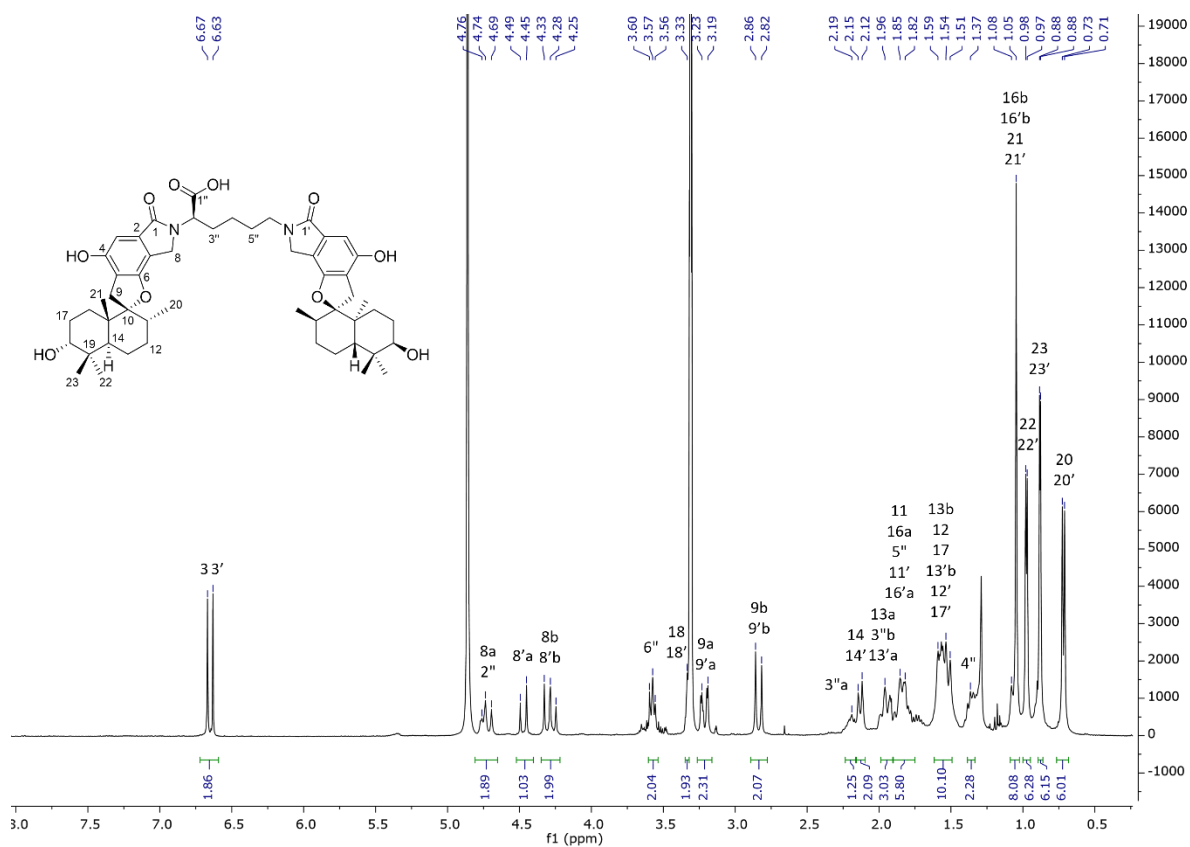

Figure S9.  $^1\text{H}$  NMR spectrum (500 MHz,  $\text{CD}_3\text{OD}$ ) of stachylocin G (2).

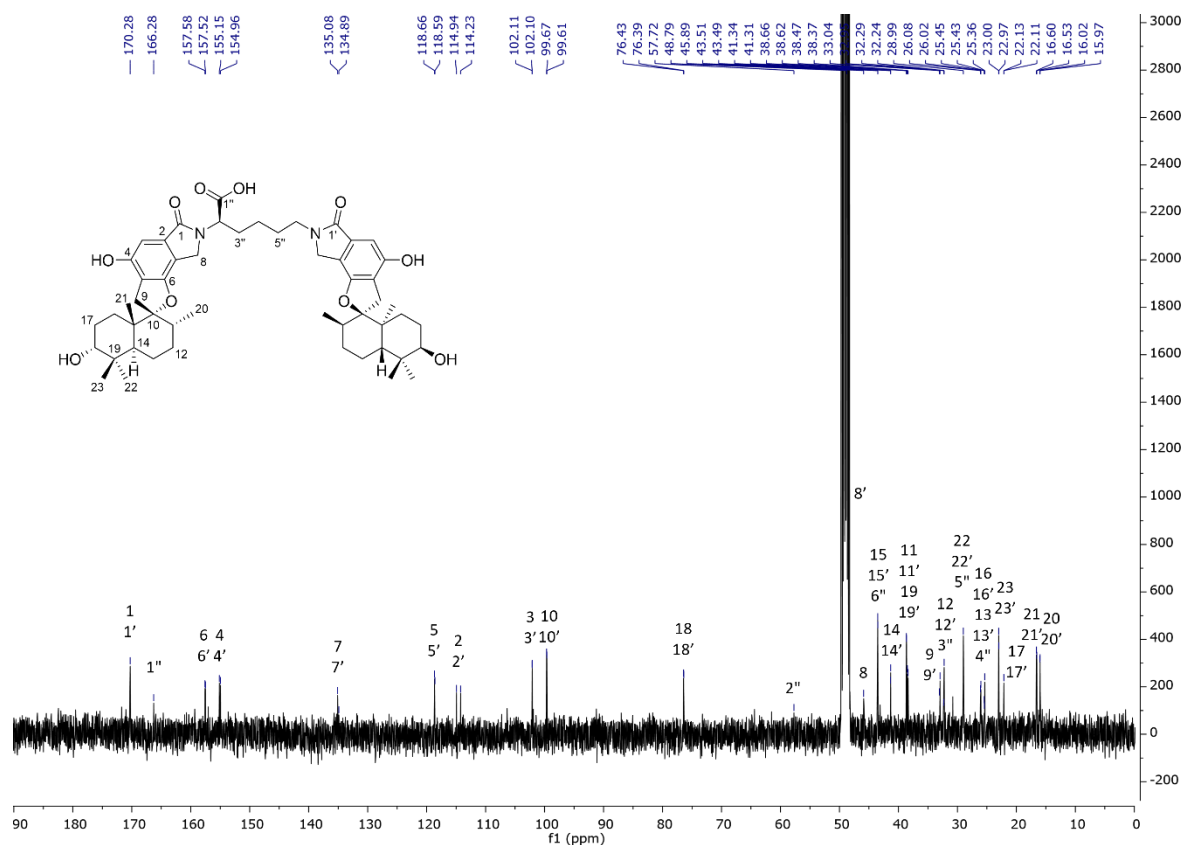

Figure S10.  $^{13}\text{C}$  NMR spectrum (125 MHz,  $\text{CD}_3\text{OD}$ ) of stachybin G (2).

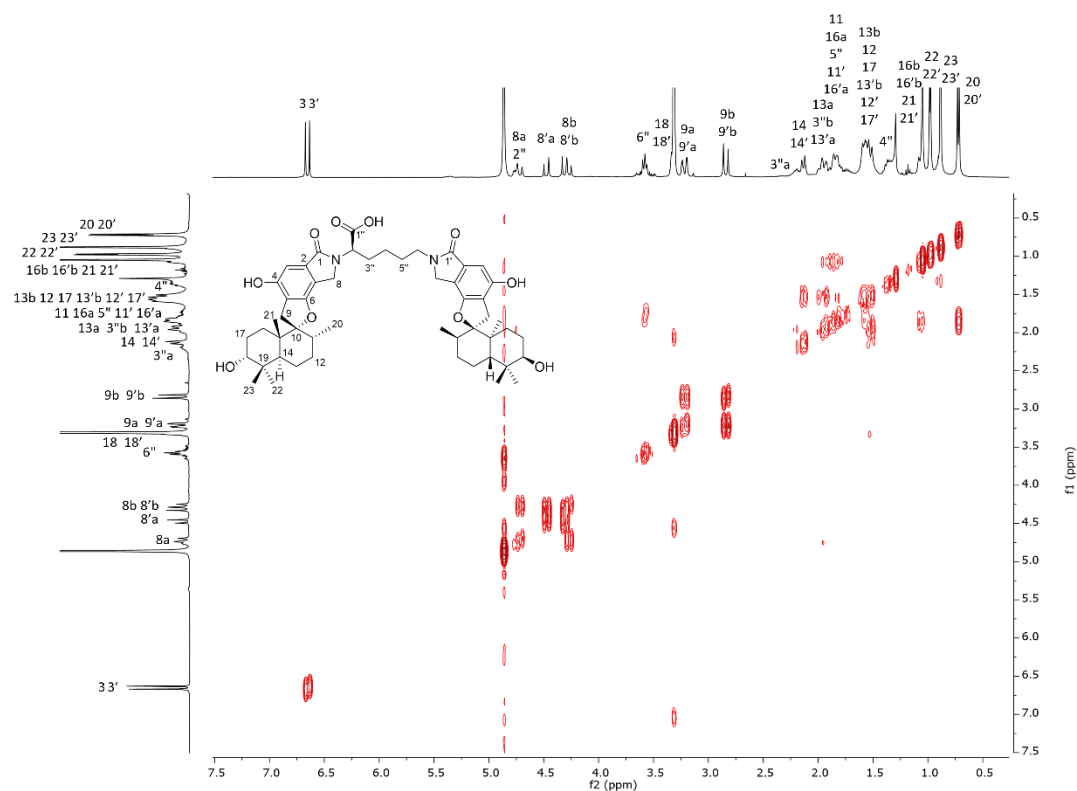

Figure S11.  $^1\text{H}$ - $^1\text{H}$  COSY NMR spectrum (500/500 MHz,  $\text{CD}_3\text{OD}$ ) of stachybin G (2).

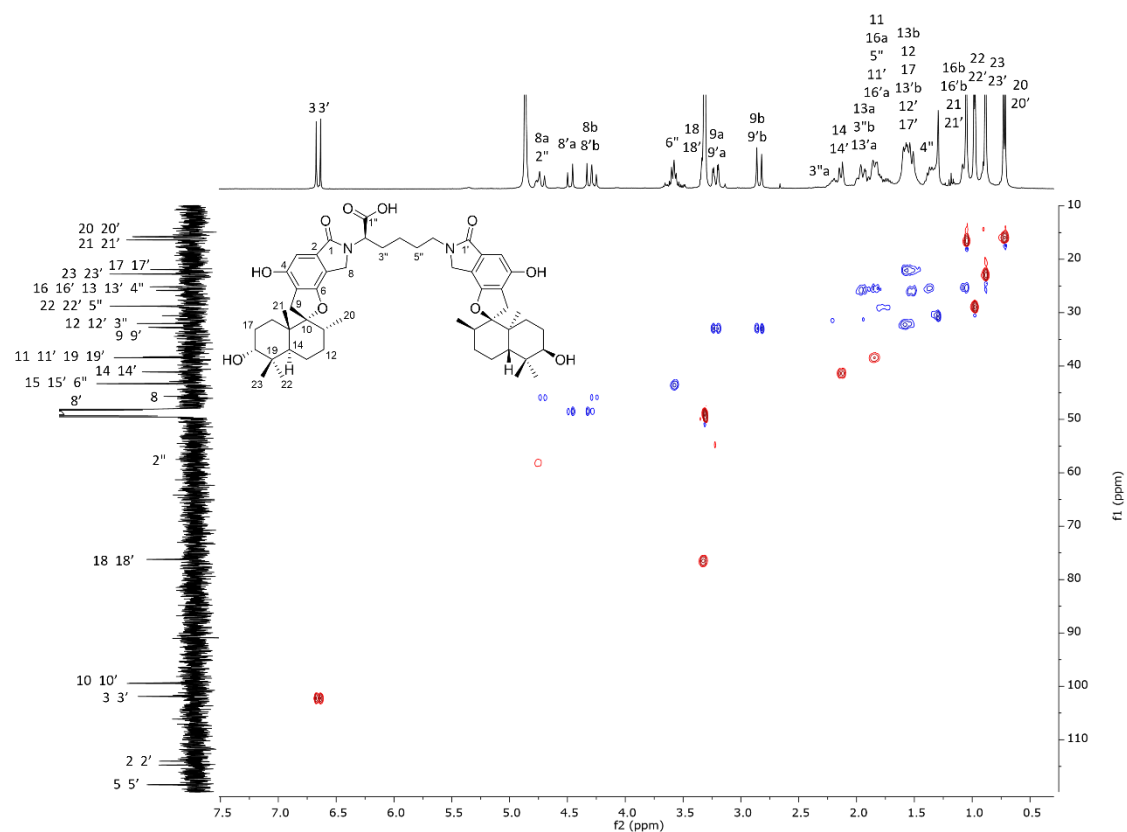

Figure S12.  $^1\text{H}$ - $^{13}\text{C}$  HSQC NMR spectrum (500/125 MHz,  $\text{CD}_3\text{OD}$ ) of stachylocin G (2).

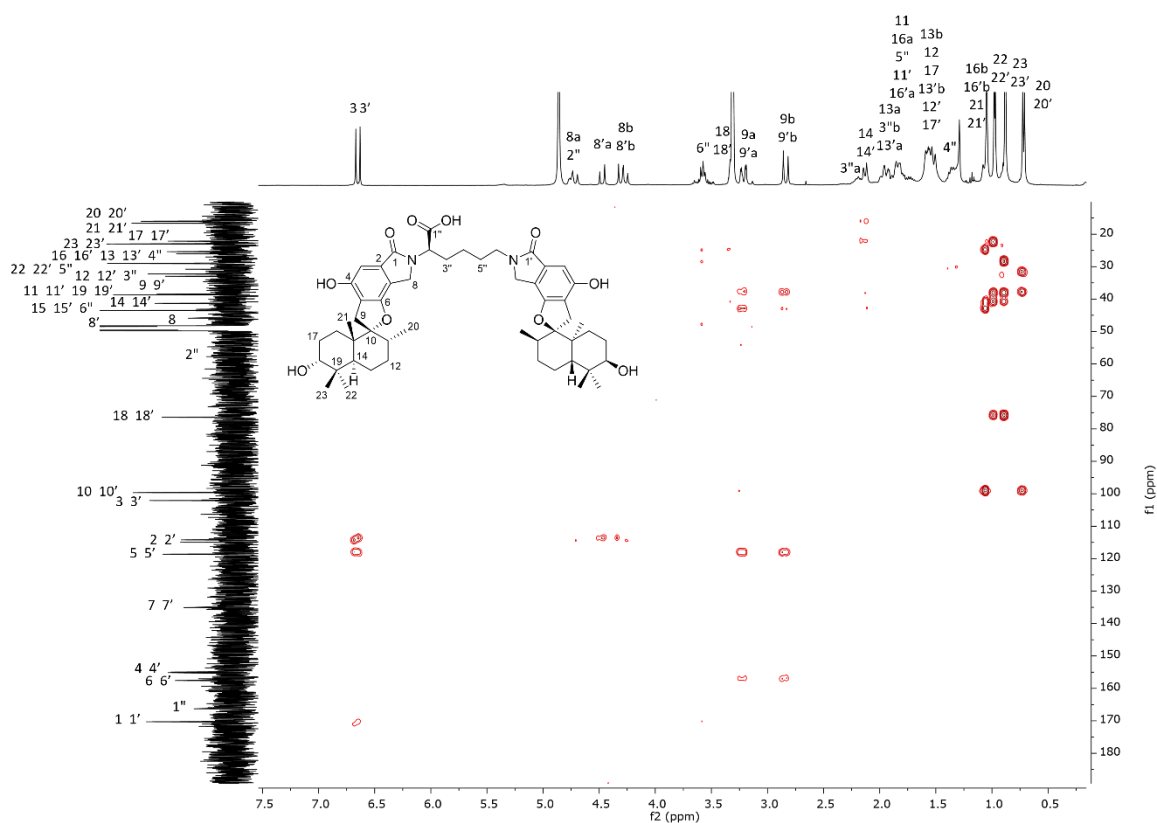

Figure S13.  $^1\text{H}$ - $^{13}\text{C}$  HMBC NMR spectrum (500/125 MHz,  $\text{CD}_3\text{OD}$ ) of stachylocin G (2).

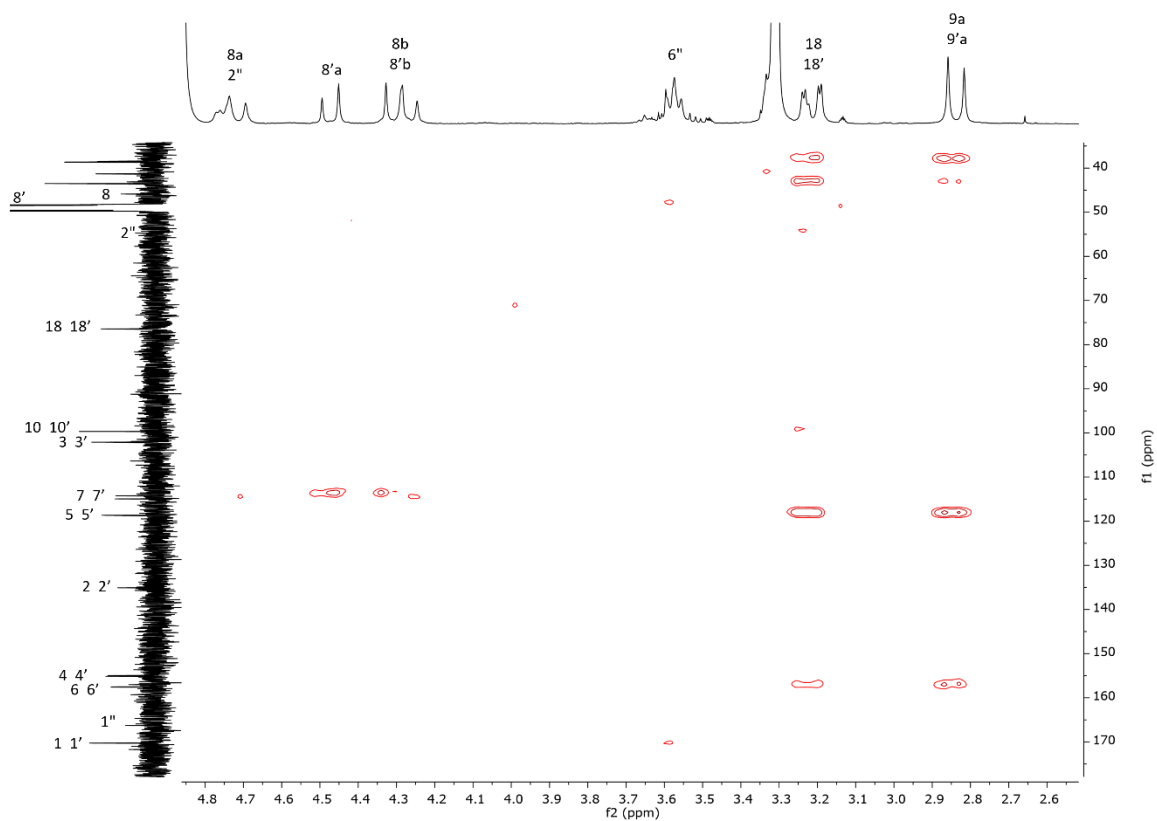

**Figure S14.** Zoom of the  $^1\text{H}$ - $^{13}\text{C}$  HMBC NMR spectrum (500/125 MHz,  $\text{CD}_3\text{OD}$ ) of stachylocin G (2).

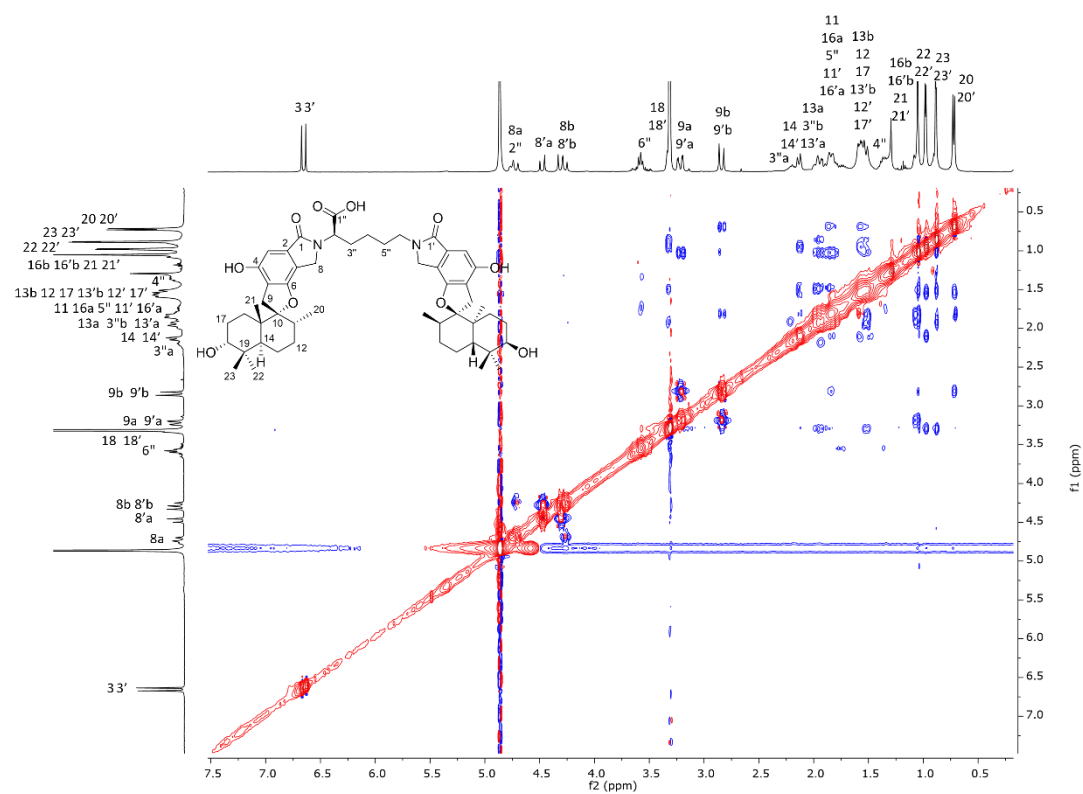

**Figure S15.**  $^1\text{H}$ - $^1\text{H}$  NOESY NMR spectrum (500/500 MHz,  $\text{CD}_3\text{OD}$ ) of stachylocin G (2).



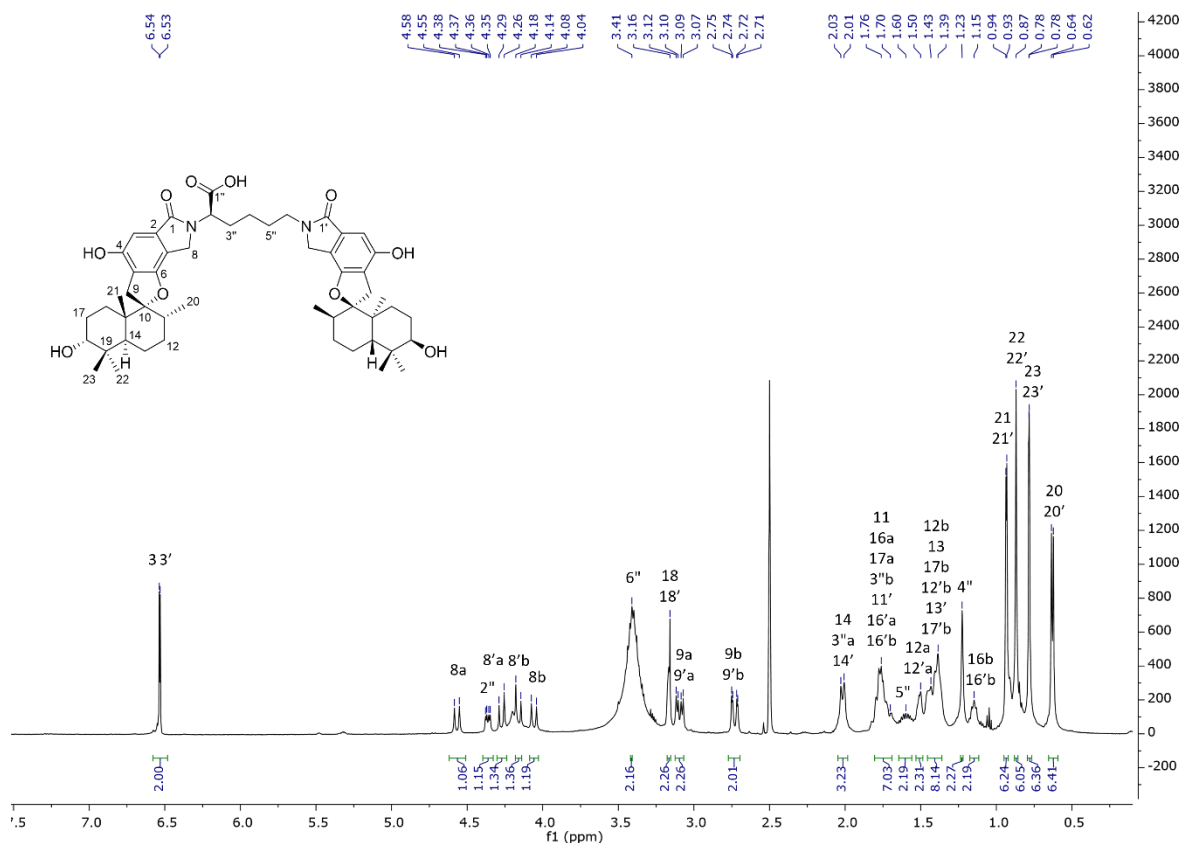

Figure S16.  $^1\text{H}$  NMR spectrum (500 MHz,  $(\text{CD}_3)_2\text{SO}$ ) of stachylocin G (2).

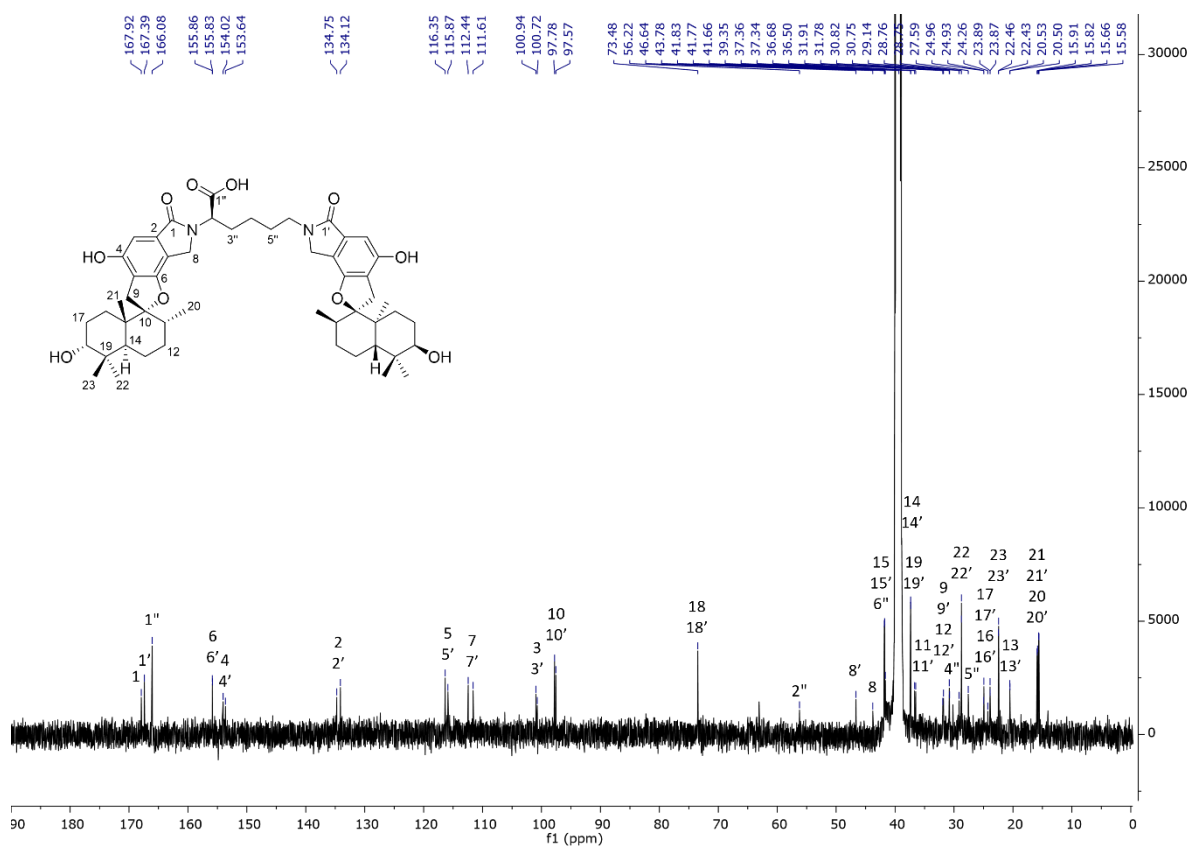

Figure S17.  $^{13}\text{C}$  NMR spectrum (125 MHz,  $(\text{CD}_3)_2\text{SO}$ ) of stachylocin G (2).

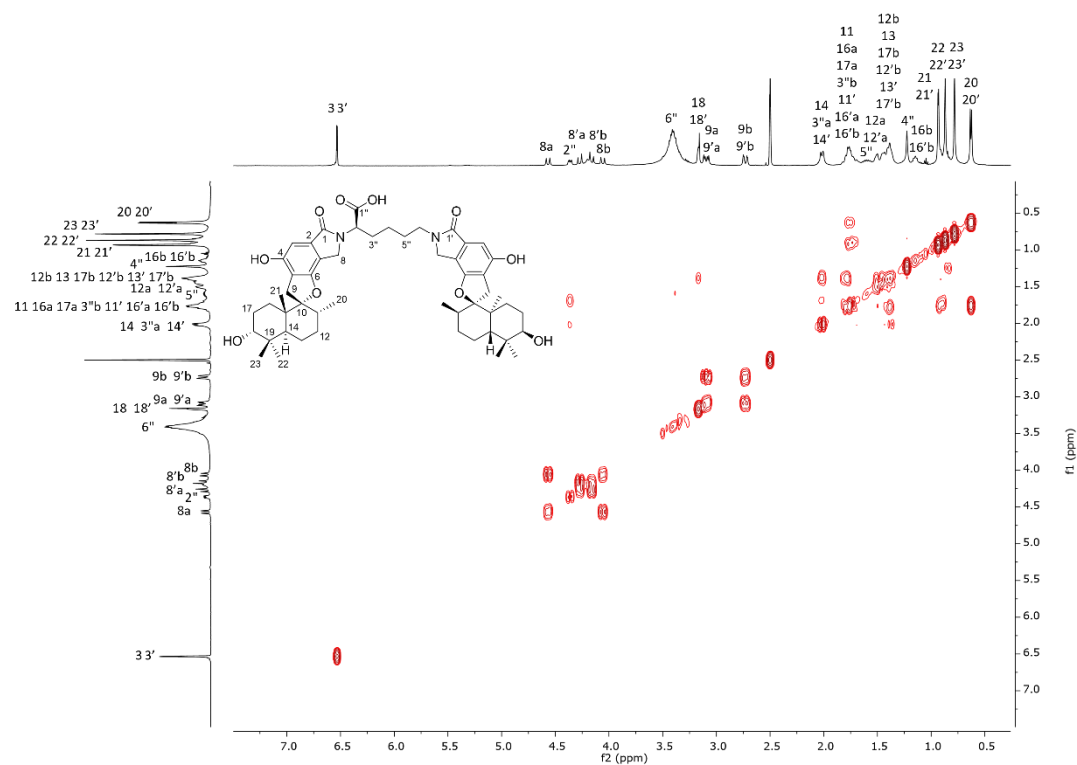

Figure S18.  $^1\text{H}$ - $^1\text{H}$  COSY NMR spectrum (500/500 MHz,  $(\text{CD}_3)_2\text{SO}$ ) of stachylocin G (2).

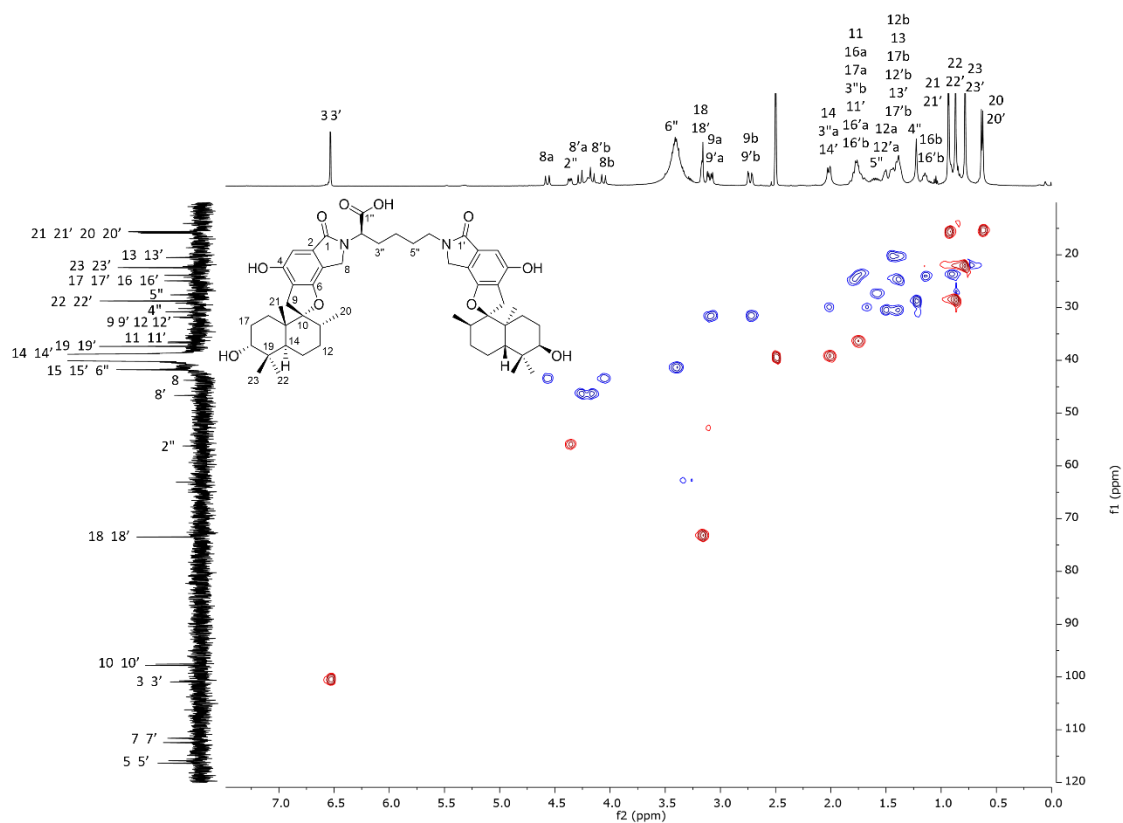

Figure S19.  $^1\text{H}$ - $^{13}\text{C}$  HSQC NMR spectrum (500/125 MHz,  $(\text{CD}_3)_2\text{SO}$ ) of stachylocin G (2).

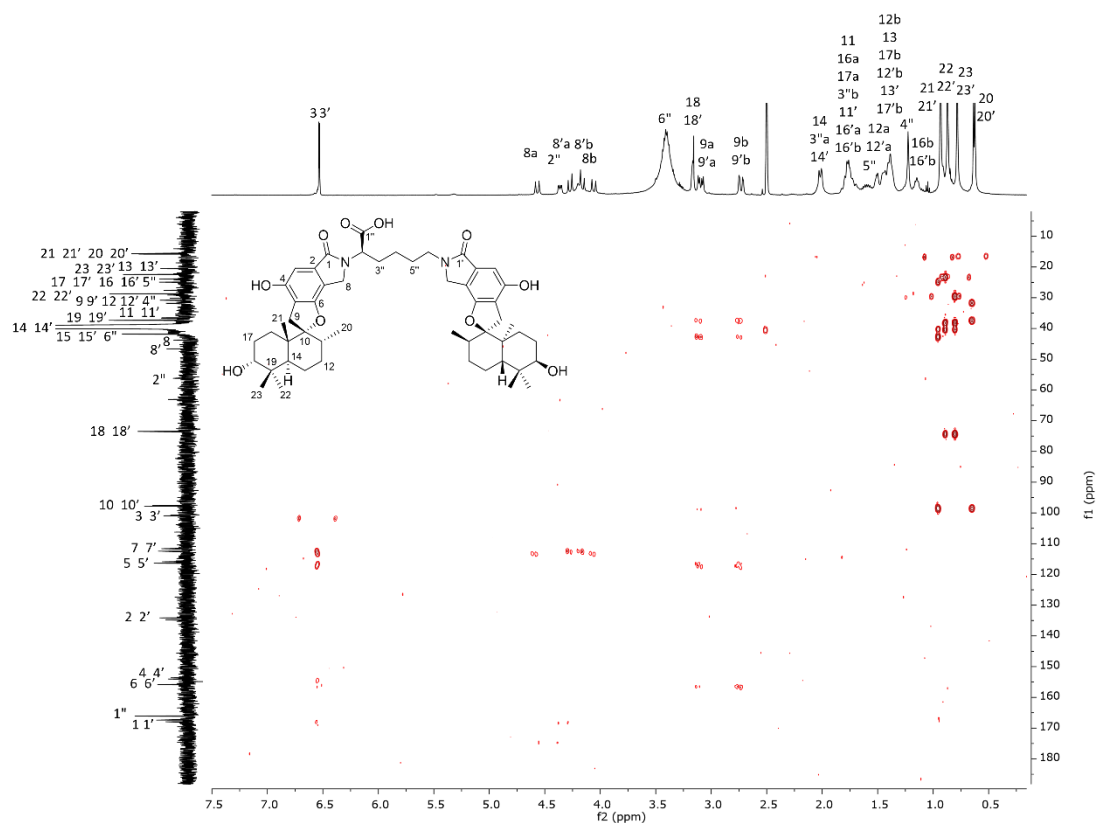

**Figure S20.**  $^1\text{H}$ - $^{13}\text{C}$  HMBC NMR spectrum (500/125 MHz,  $(\text{CD}_3)_2\text{SO}$ ) of stachybotrin G (2).

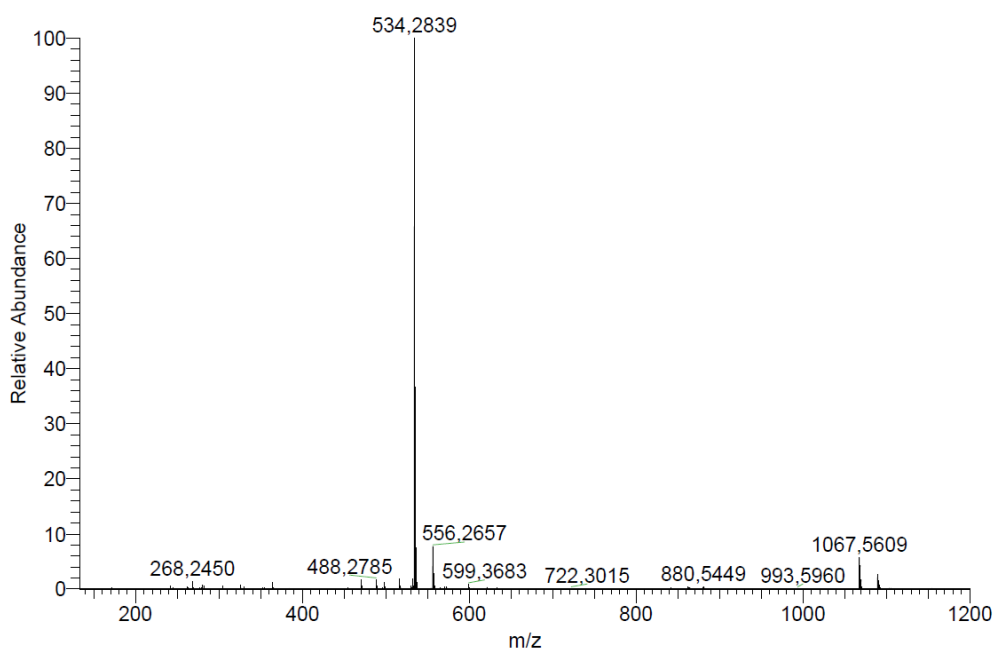

**Figure S21.** HRESI(+)MS spectrum of stachybotrin I (3).

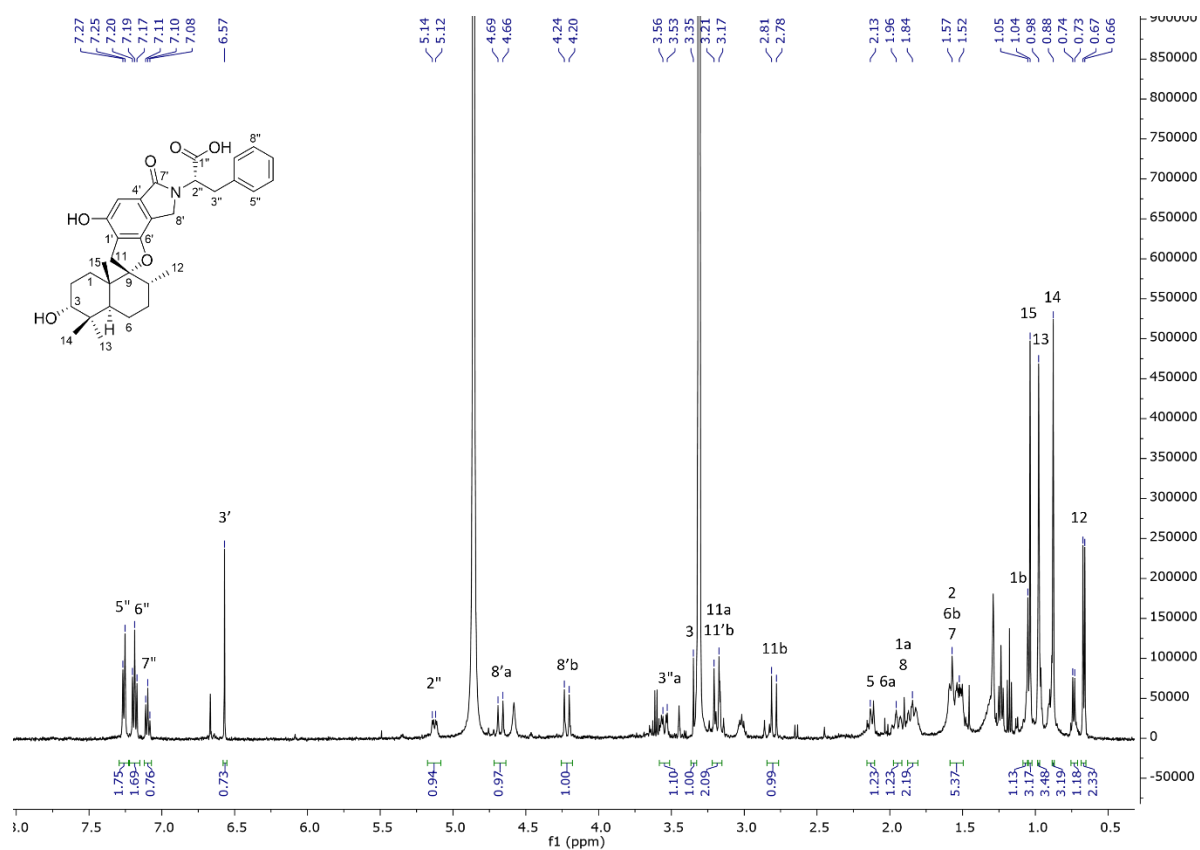

**Figure S22.** <sup>1</sup>H NMR spectrum (500 MHz, CD<sub>3</sub>OD) of stachybotrin I (3).

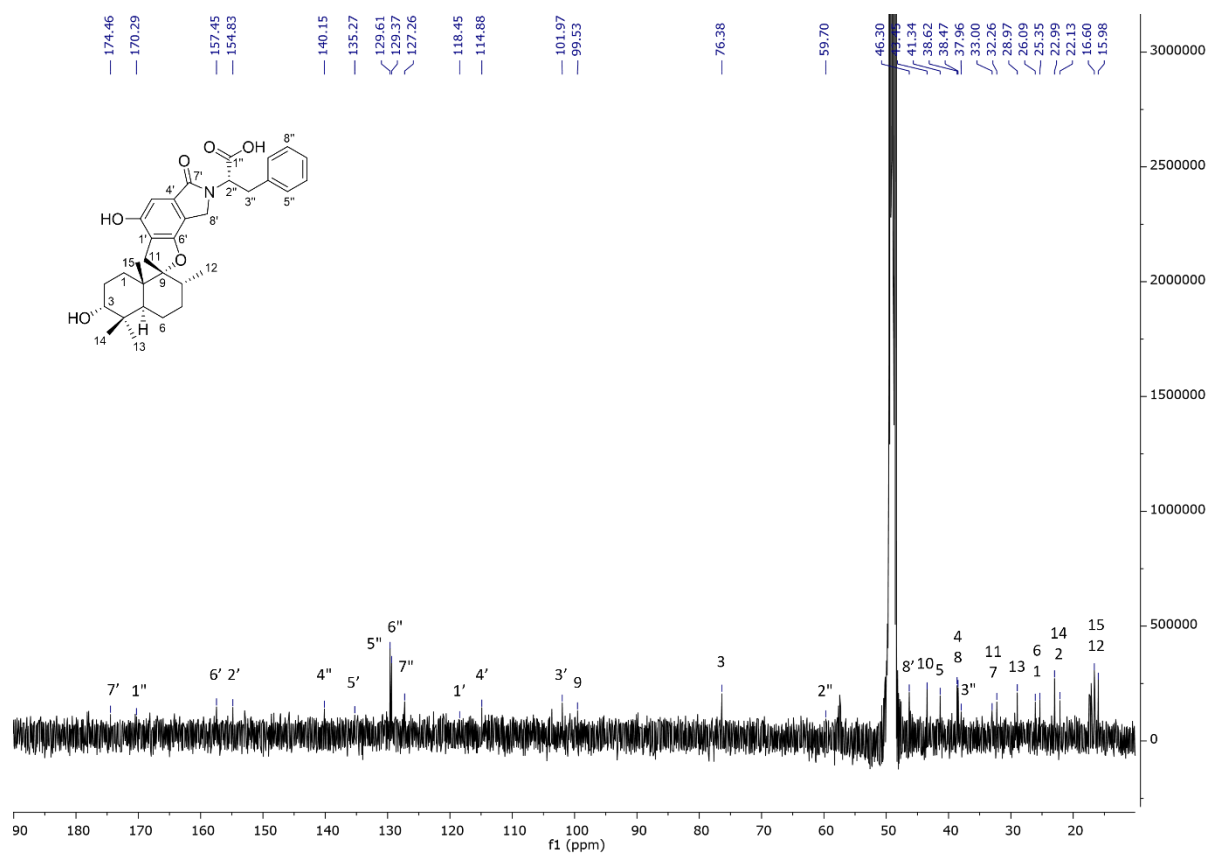

**Figure S23.** <sup>13</sup>C NMR spectrum (125 MHz, CD<sub>3</sub>OD) of stachybotrin I (3).

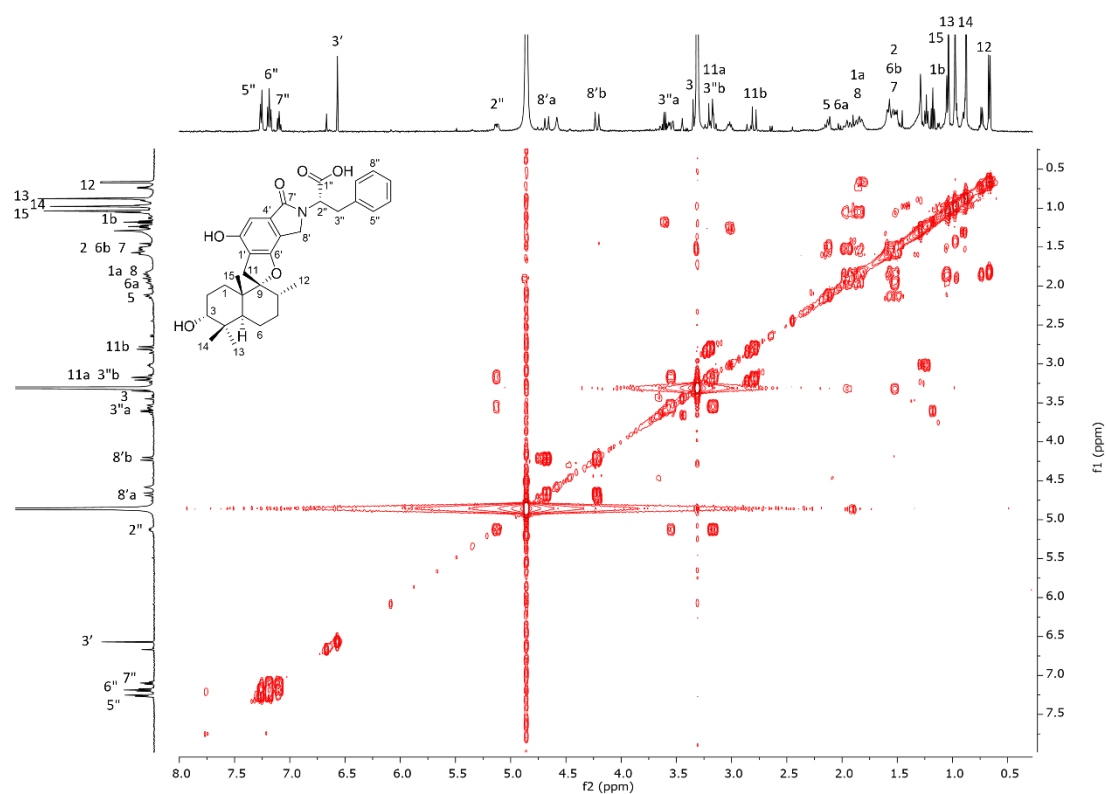

**Figure S24.**  $^1\text{H}$ - $^1\text{H}$  COSY NMR spectrum (500/500 MHz,  $\text{CD}_3\text{OD}$ ) of stachybotrin I (**3**).

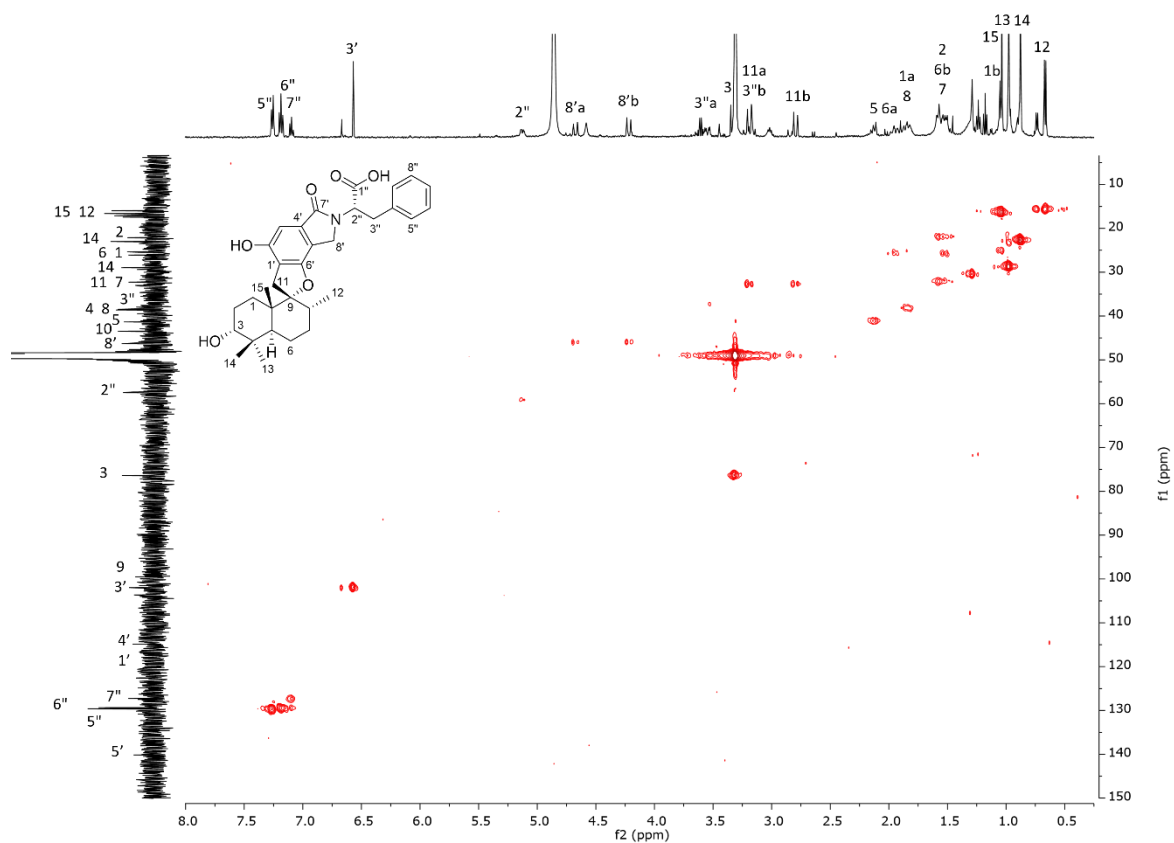

**Figure S25.**  $^1\text{H}$ - $^{13}\text{C}$  HSQC NMR spectrum (500/125 MHz,  $\text{CD}_3\text{OD}$ ) of stachybotrin I (**3**).

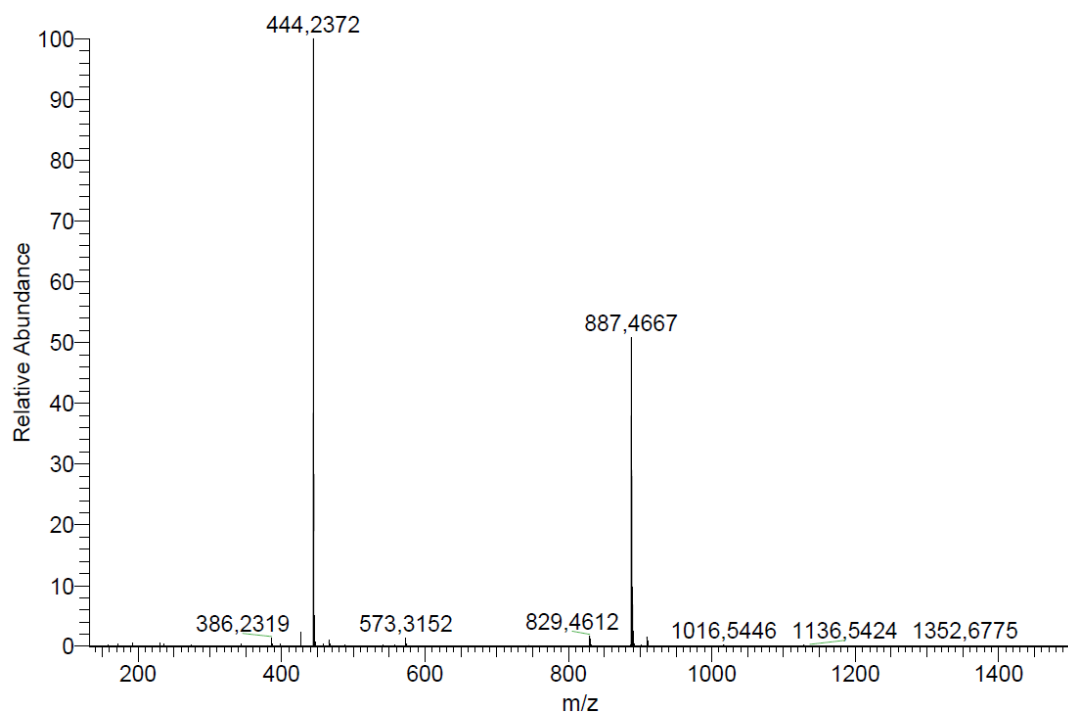

Figure S26. HRESI(+)-MS spectrum of stachybotrin H (4).

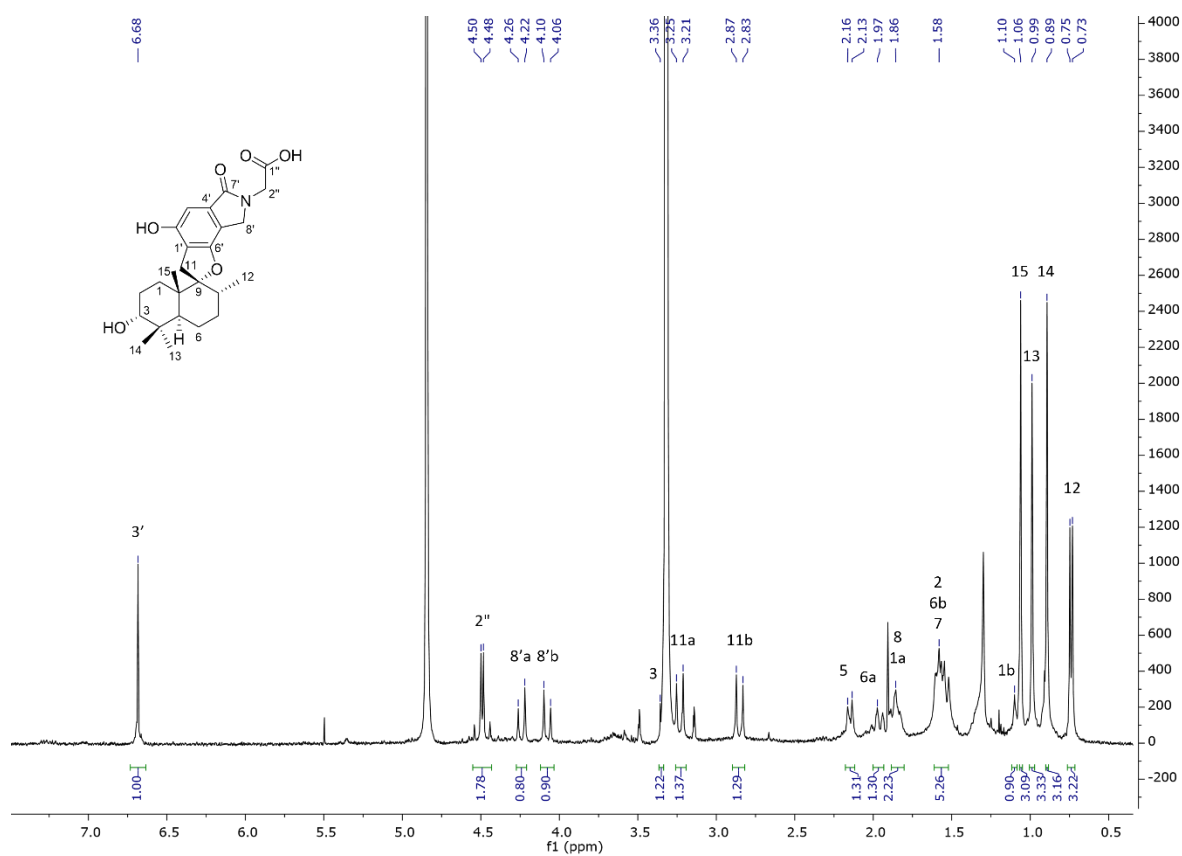

Figure S27.  $^1\text{H}$  NMR spectrum (500 MHz,  $\text{CD}_3\text{OD}$ ) of stachybotrin H (4).

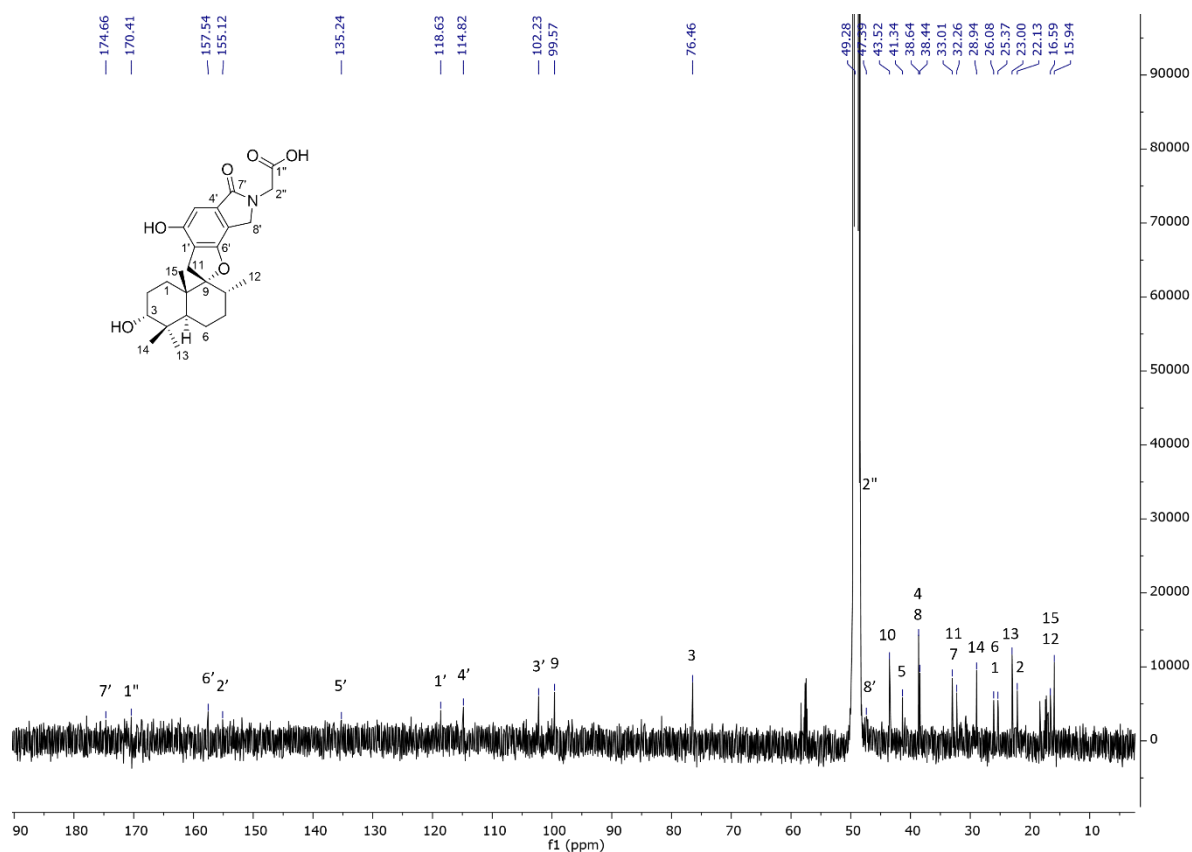

Figure S28.  $^{13}\text{C}$  NMR spectrum (125 MHz,  $\text{CD}_3\text{OD}$ ) of stachybotrin H (4).

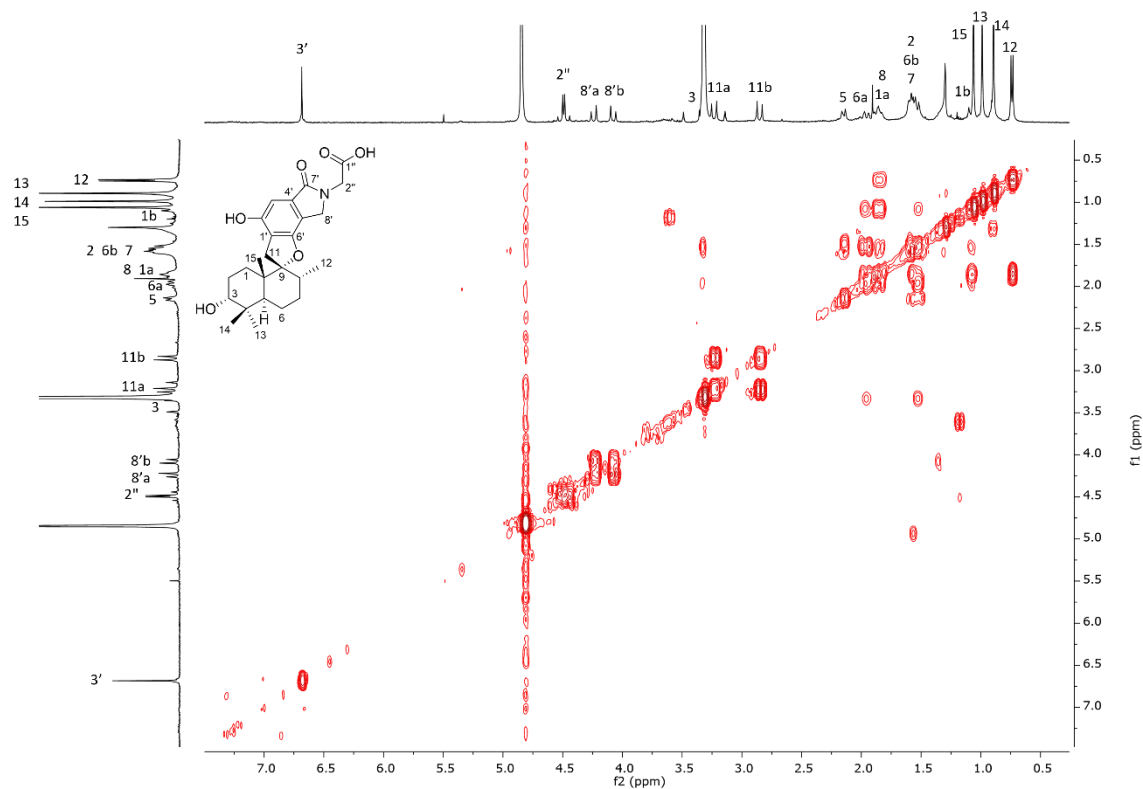

Figure S29.  $^1\text{H}$ - $^1\text{H}$  COSY NMR spectrum (500/500 MHz,  $\text{CD}_3\text{OD}$ ) of stachybotrin H (4).

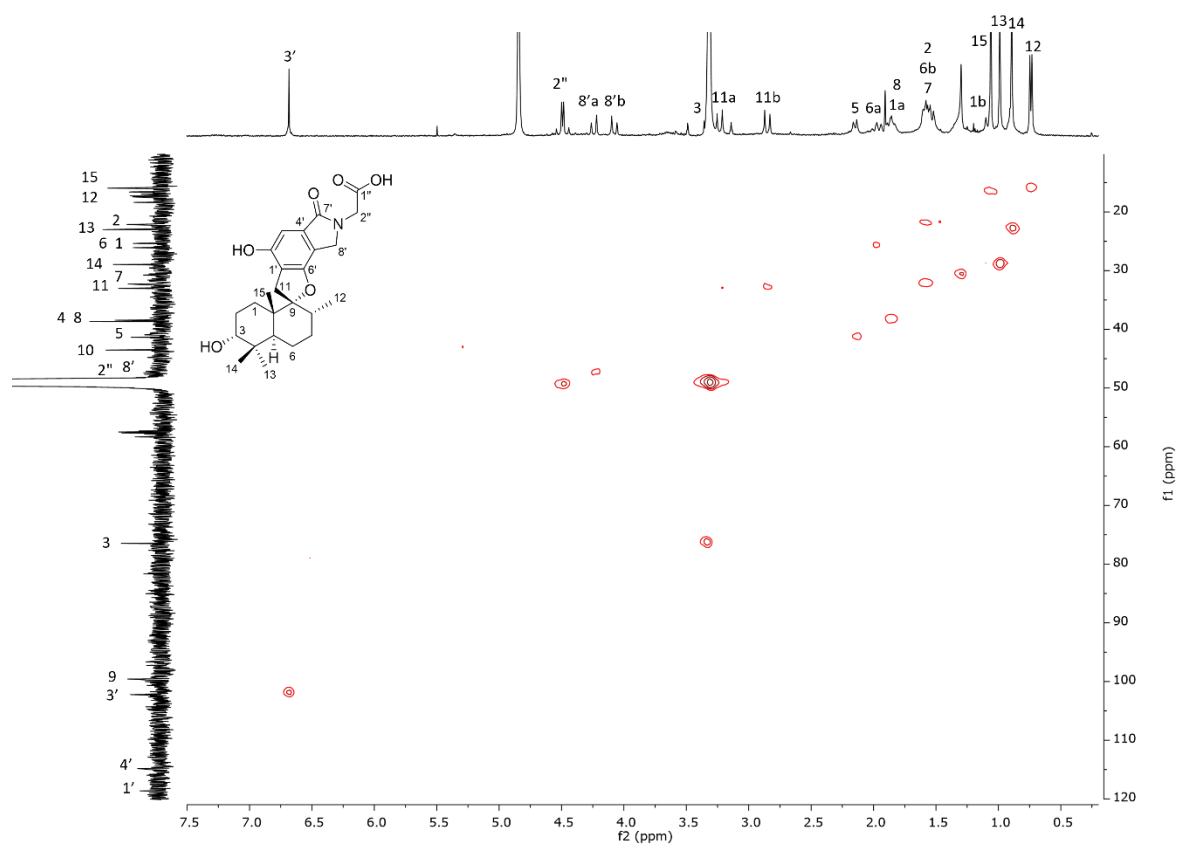

**Figure S30.**  $^1\text{H}$ - $^{13}\text{C}$  HSQC NMR spectrum (500/125 MHz,  $\text{CD}_3\text{OD}$ ) of stachybotrin H (4).

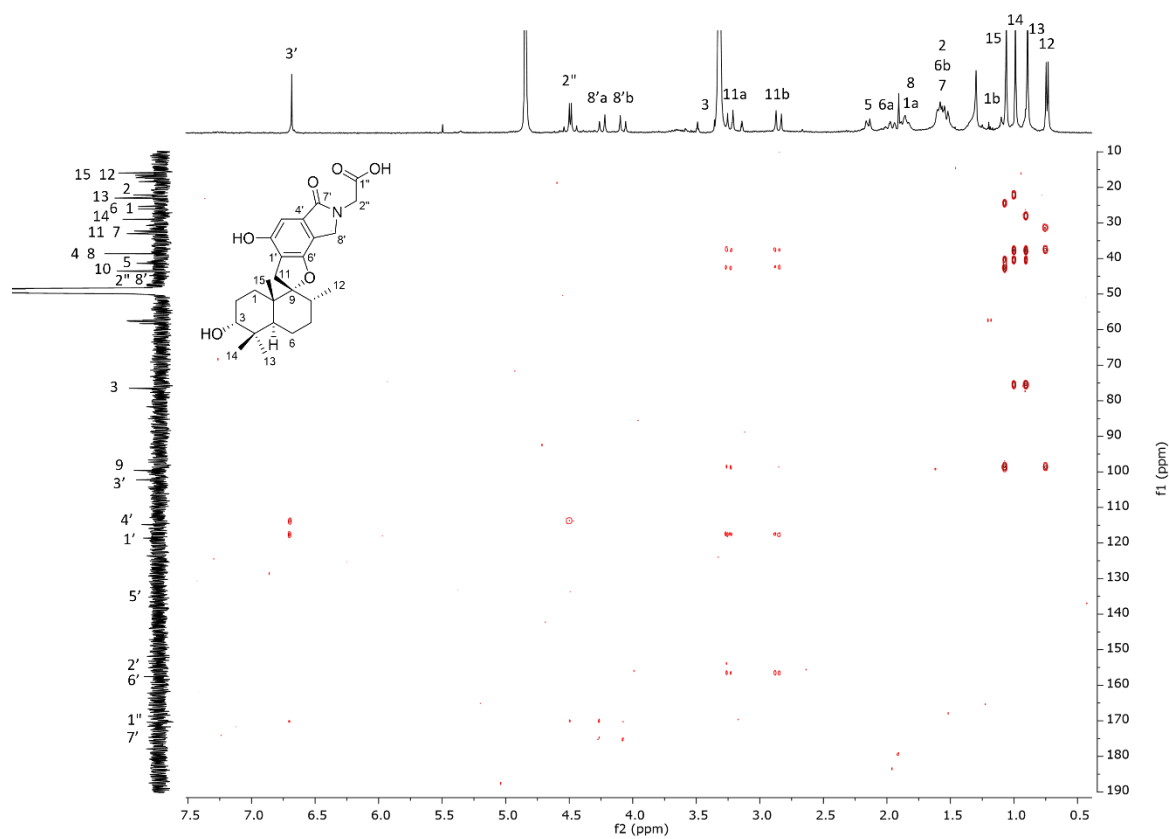

**Figure S31.**  $^1\text{H}$ - $^{13}\text{C}$  HMBC NMR spectrum (500/125 MHz,  $\text{CD}_3\text{OD}$ ) of stachybotrin H (4).



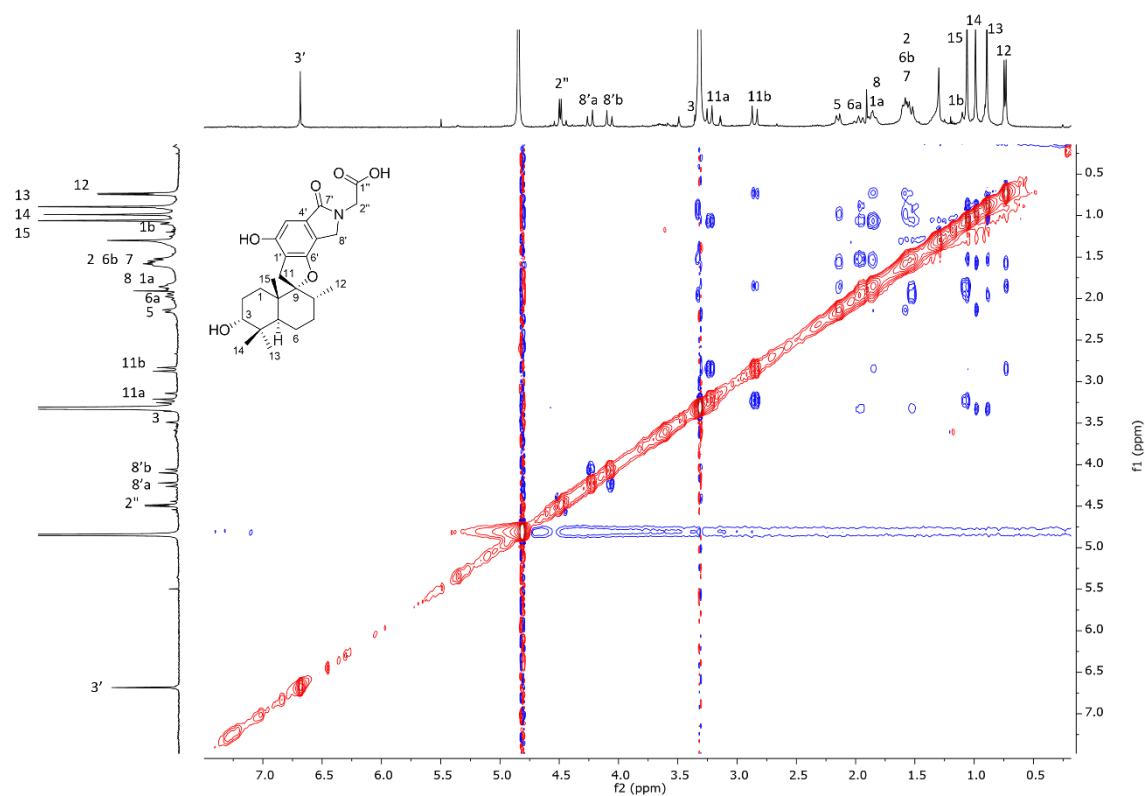

**Figure S32.**  $^1\text{H}$ - $^1\text{H}$  NOESY NMR spectrum (500/500 MHz,  $\text{CD}_3\text{OD}$ ) of stachybotrin H (4).

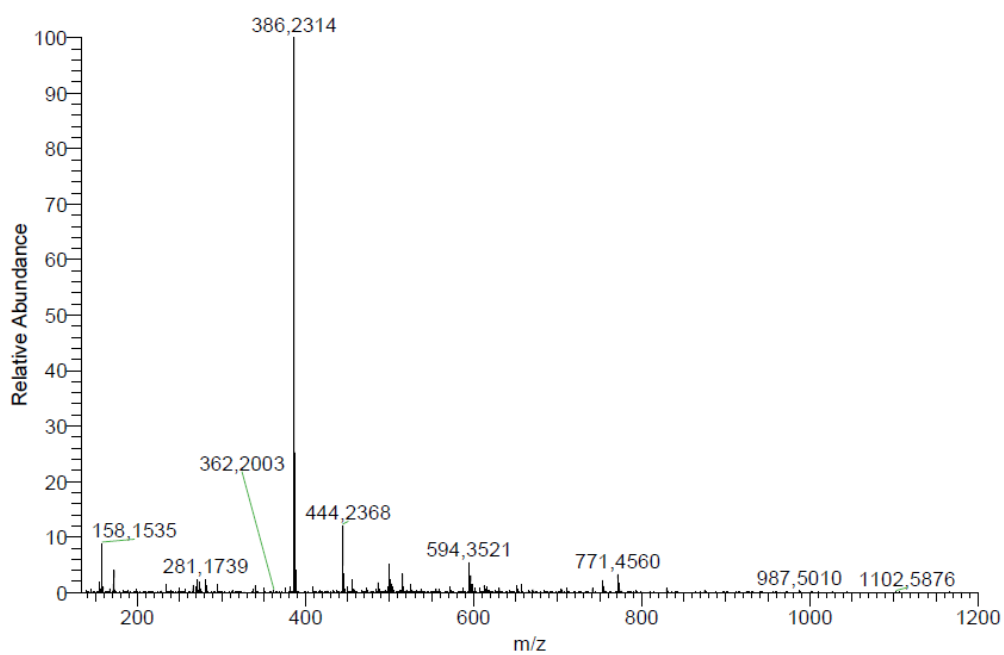

**Figure S33.** HRESI(+)MS spectrum of stachybotrylactam (5).

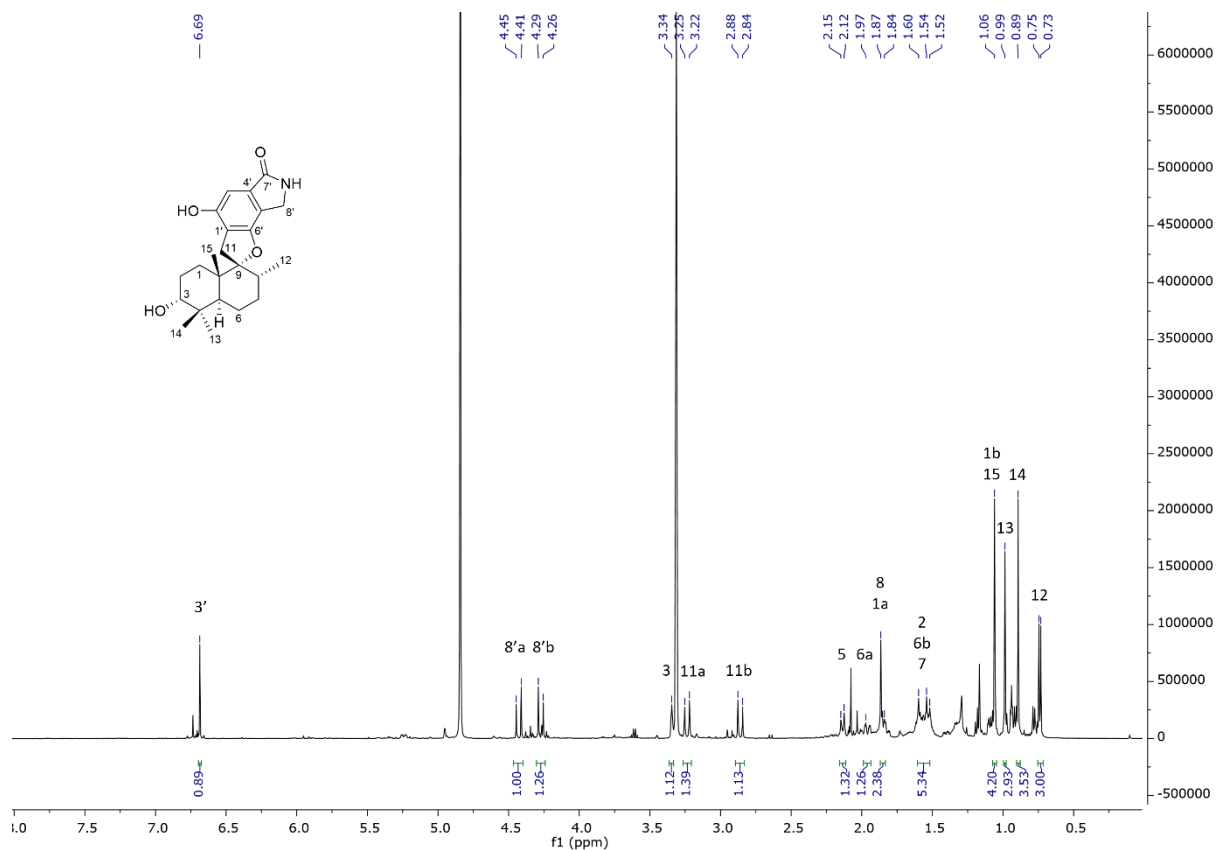

Figure S34.  $^1\text{H}$  NMR spectrum (500 MHz,  $\text{CD}_3\text{OD}$ ) of stachybotrylactam (5).

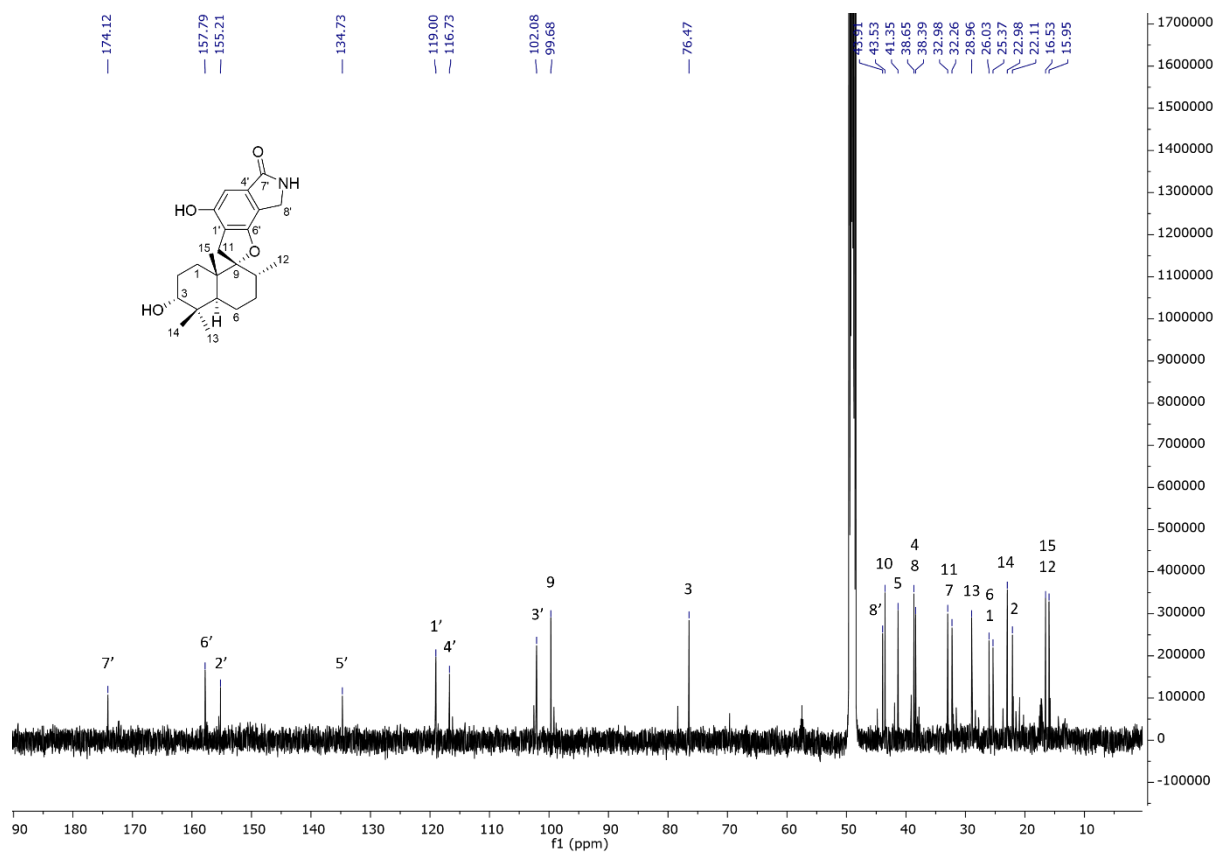

Figure S35.  $^{13}\text{C}$  NMR spectrum (125 MHz,  $\text{CD}_3\text{OD}$ ) of stachybotrylactam (5).

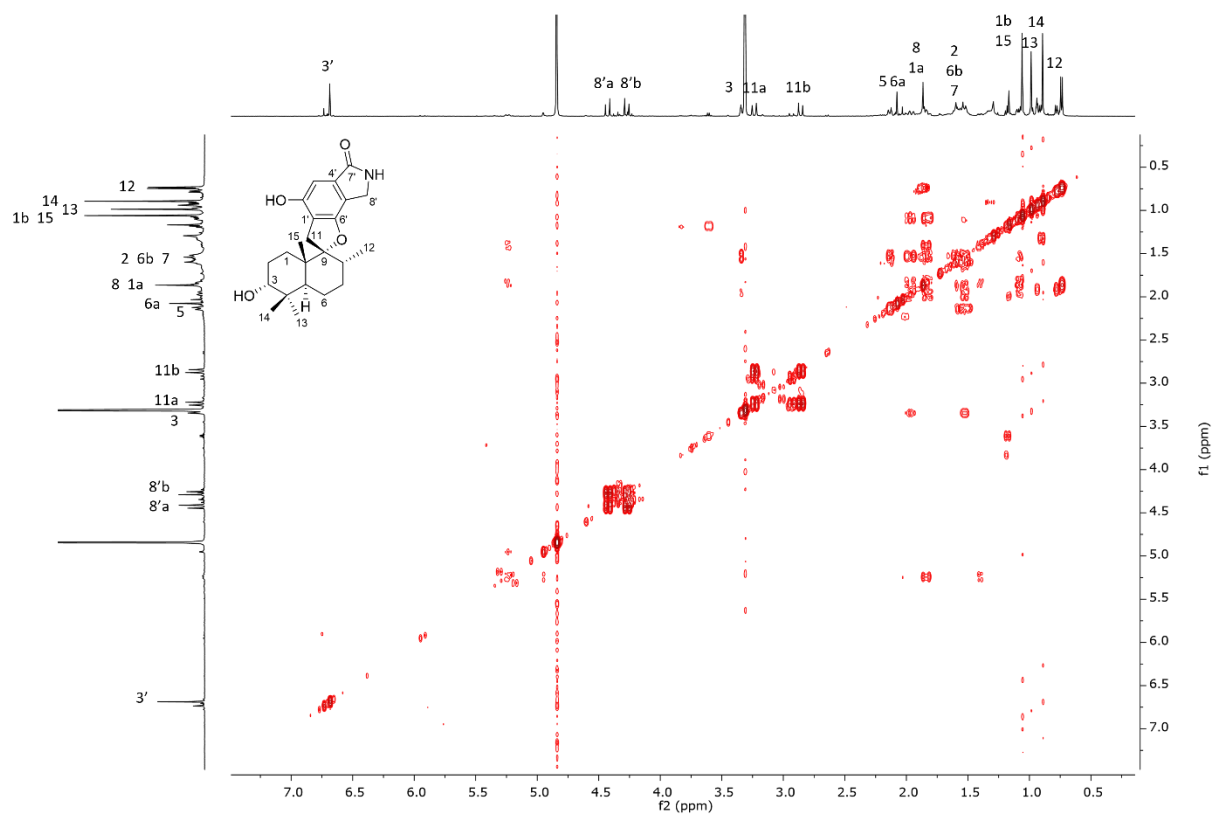

Figure S36.  $^1\text{H}$ - $^1\text{H}$  COSY NMR spectrum (500/500 MHz,  $\text{CD}_3\text{OD}$ ) of stachybotrylactam (5).

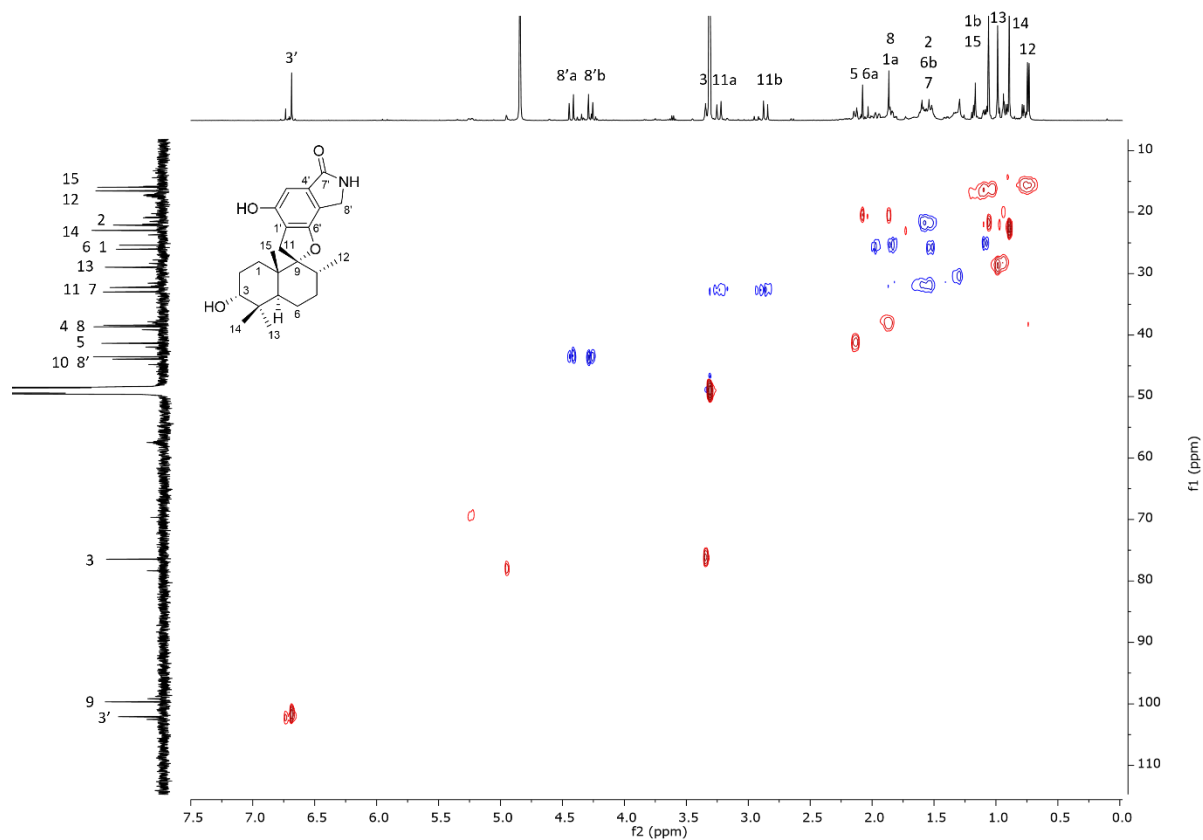

Figure S37.  $^1\text{H}$ - $^{13}\text{C}$  HSQC NMR spectrum (500/125 MHz,  $\text{CD}_3\text{OD}$ ) of stachybotrylactam (5).

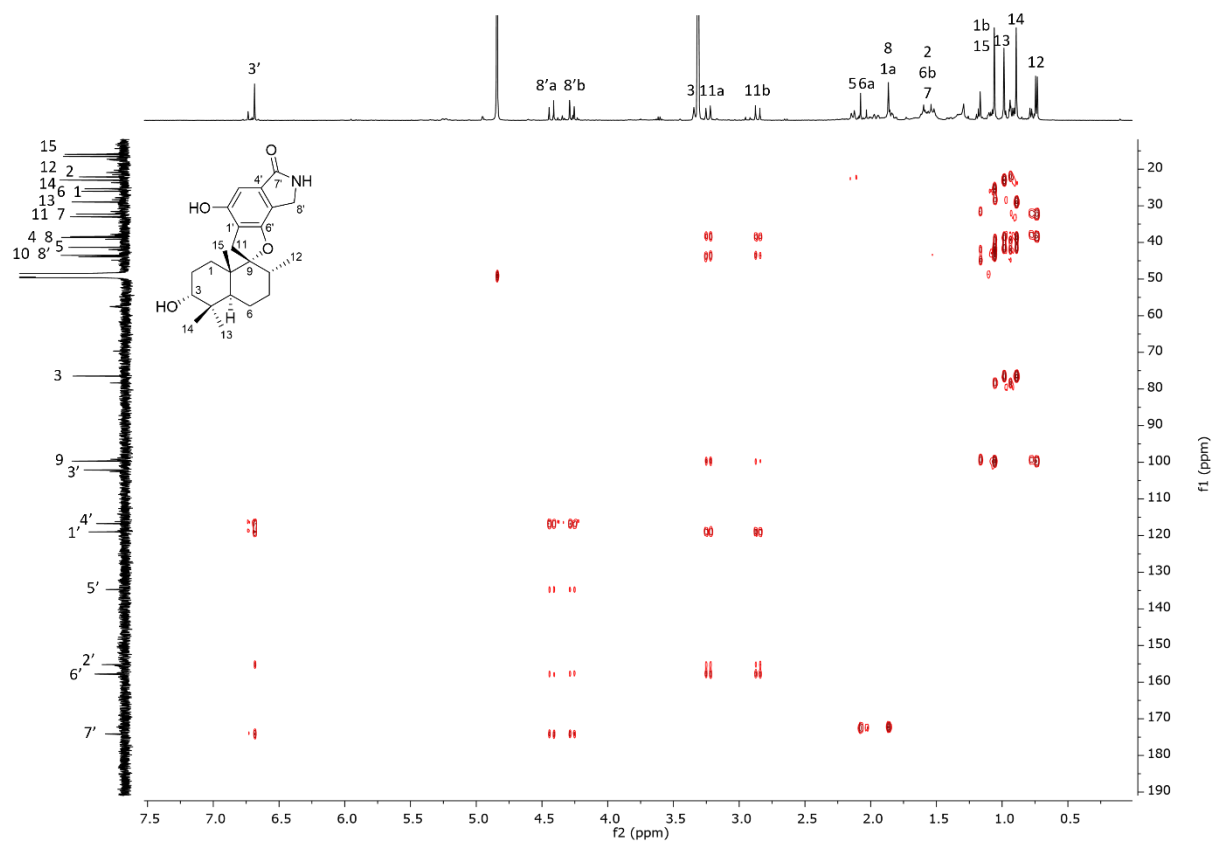

**Figure S38.**  $^1\text{H}$ - $^{13}\text{C}$  HMBC NMR spectrum (500/125 MHz,  $\text{CD}_3\text{OD}$ ) of stachybotrylactam (5).

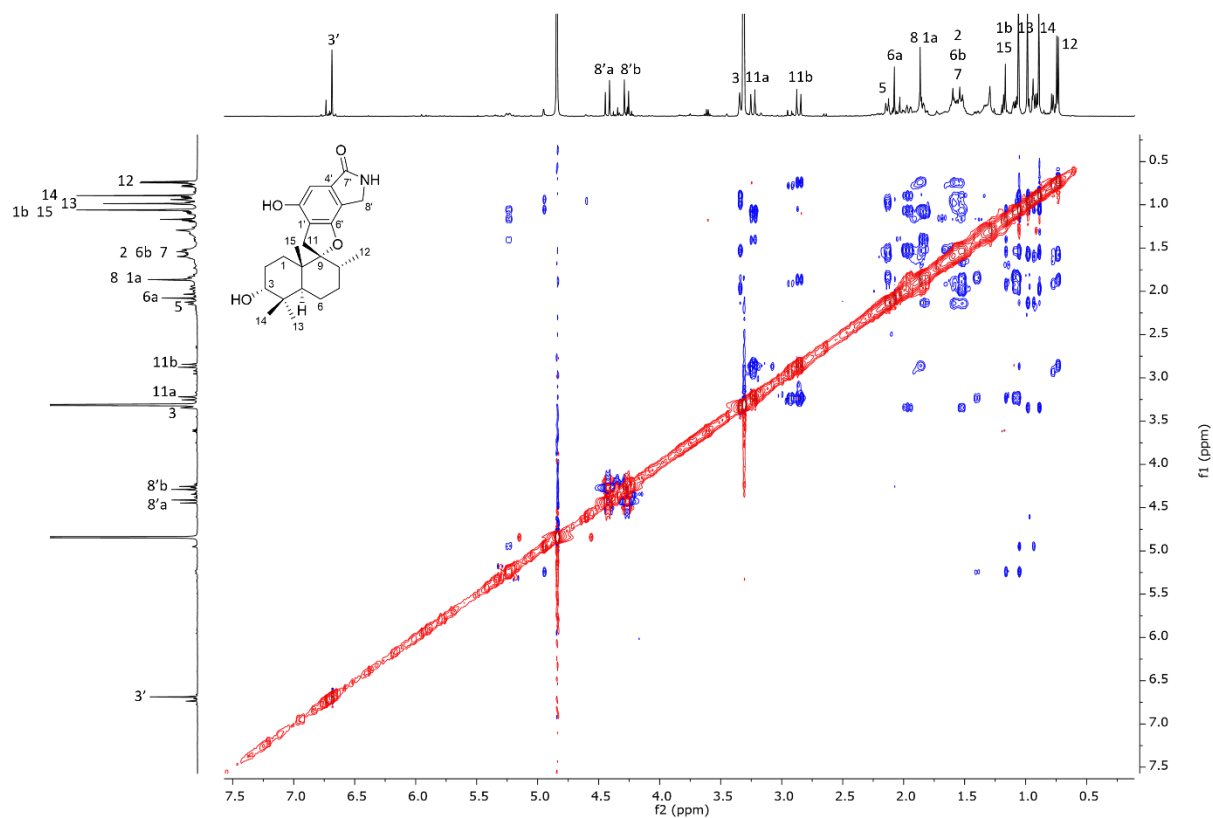

**Figure S39.**  $^1\text{H}$ - $^1\text{H}$  NOESY NMR spectrum (500/500 MHz,  $\text{CD}_3\text{OD}$ ) of stachybotrylactam (5).

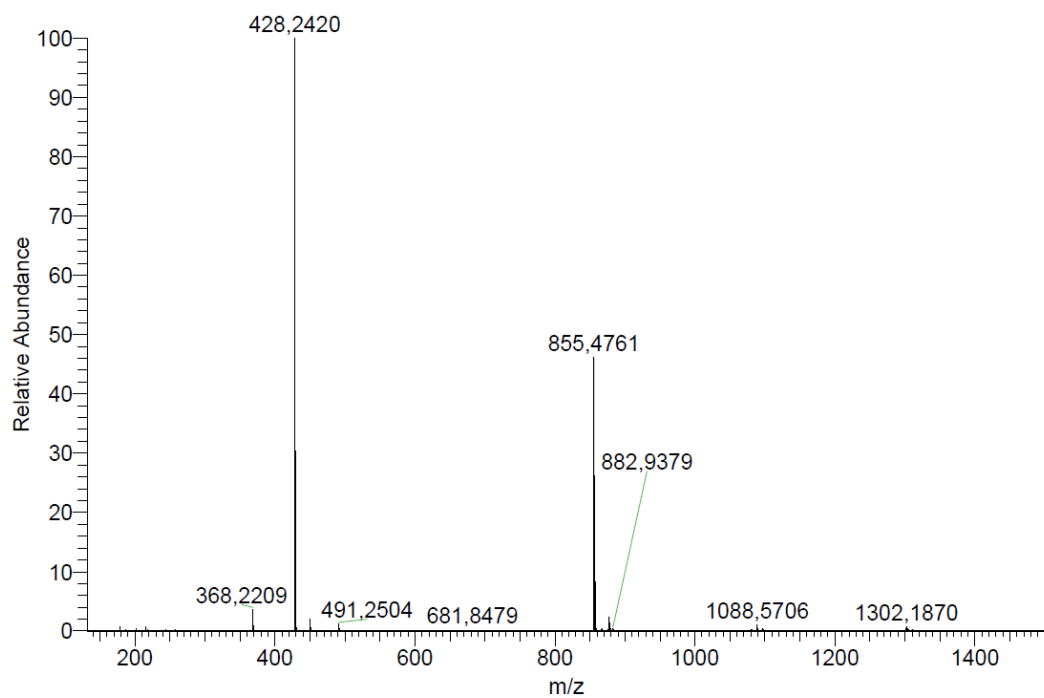

Figure S40. HRESI(+)-MS spectrum of stachybotrylactam acetate (6).

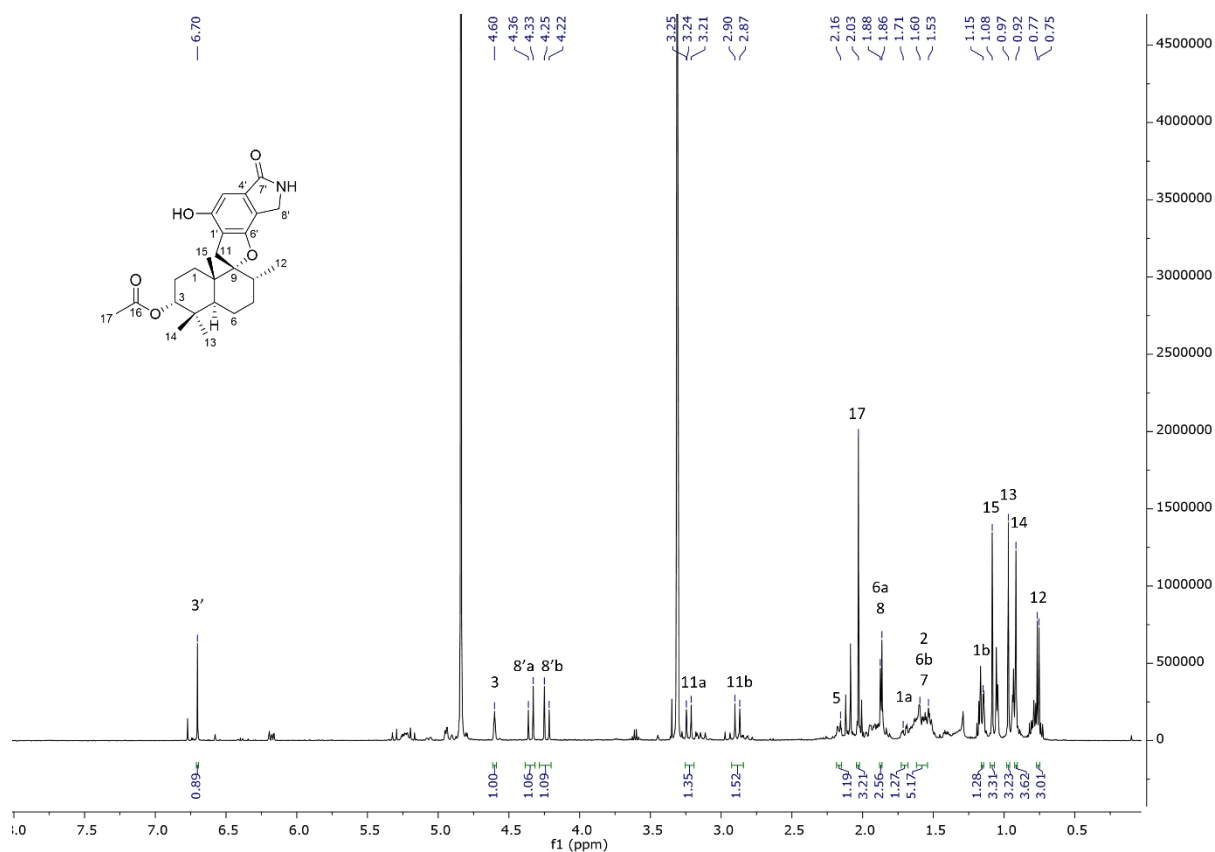

Figure S41.  $^1\text{H}$  NMR spectrum (500 MHz,  $\text{CD}_3\text{OD}$ ) of stachybotrylactam acetate (6).

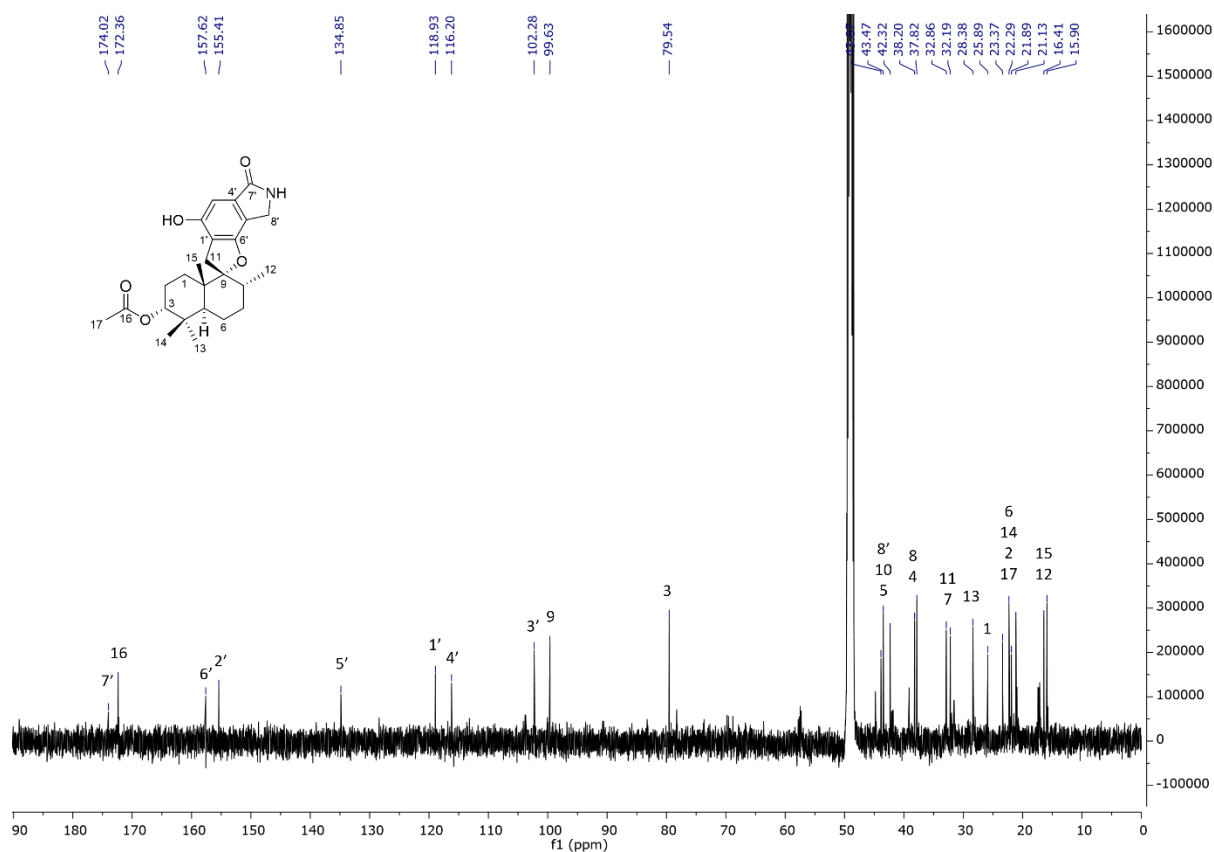

Figure S42. <sup>13</sup>C NMR spectrum (125 MHz, CD<sub>3</sub>OD) of stachybotrylactam acetate (6).

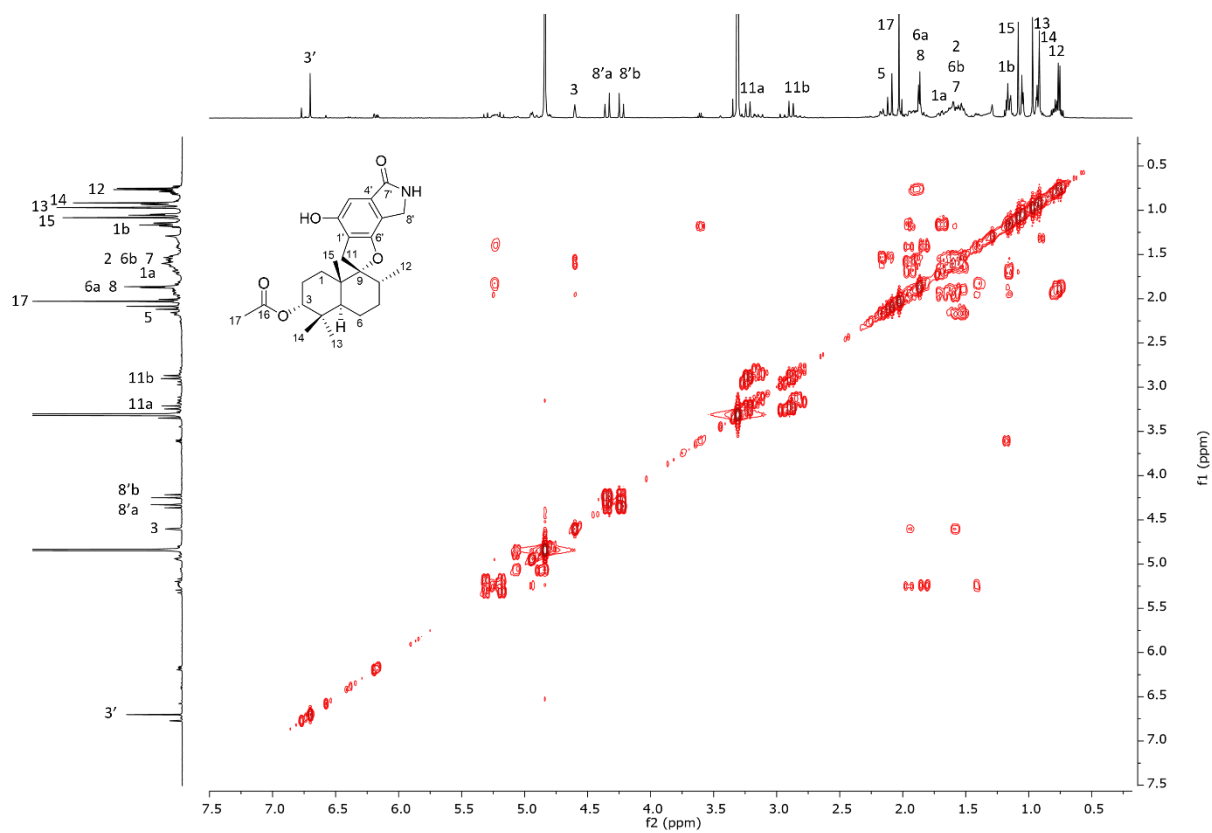

Figure S43. <sup>1</sup>H-<sup>1</sup>H COSY NMR spectrum (500/500 MHz, CD<sub>3</sub>OD) of stachybotrylactam acetate (6).

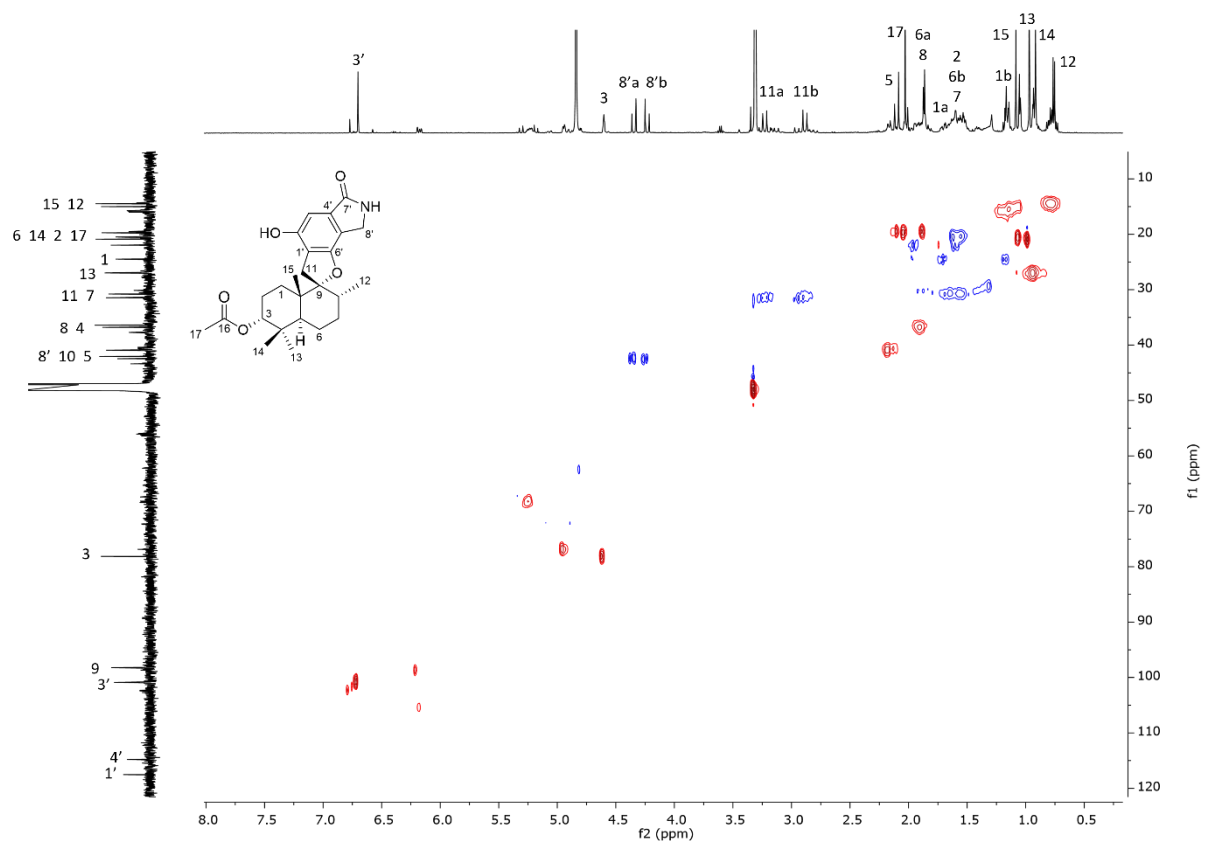

Figure S44.  $^1\text{H}$ - $^{13}\text{C}$  HSQC NMR spectrum (500/125 MHz,  $\text{CD}_3\text{OD}$ ) of stachybotrylactam acetate (**6**).

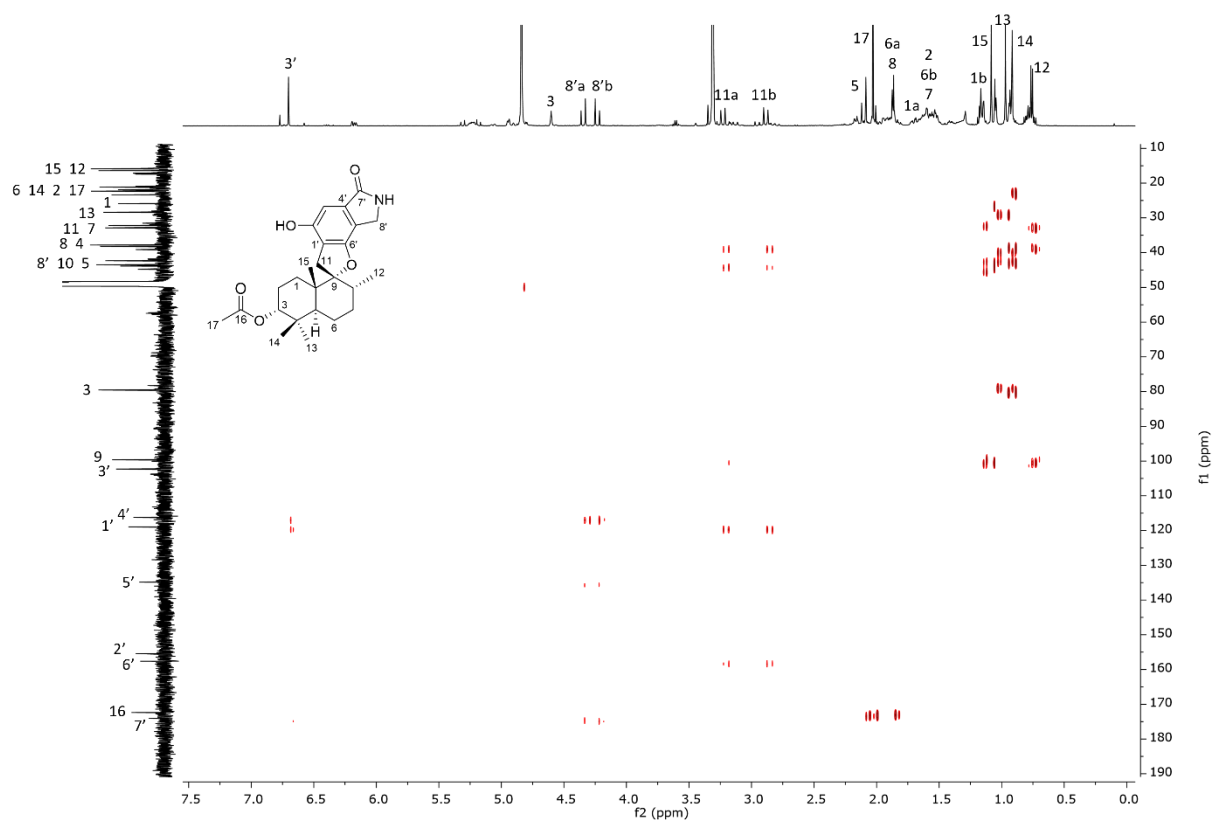

Figure S45.  $^1\text{H}$ - $^{13}\text{C}$  HMBC NMR spectrum (500/125 MHz,  $\text{CD}_3\text{OD}$ ) of stachybotrylactam acetate (**6**).





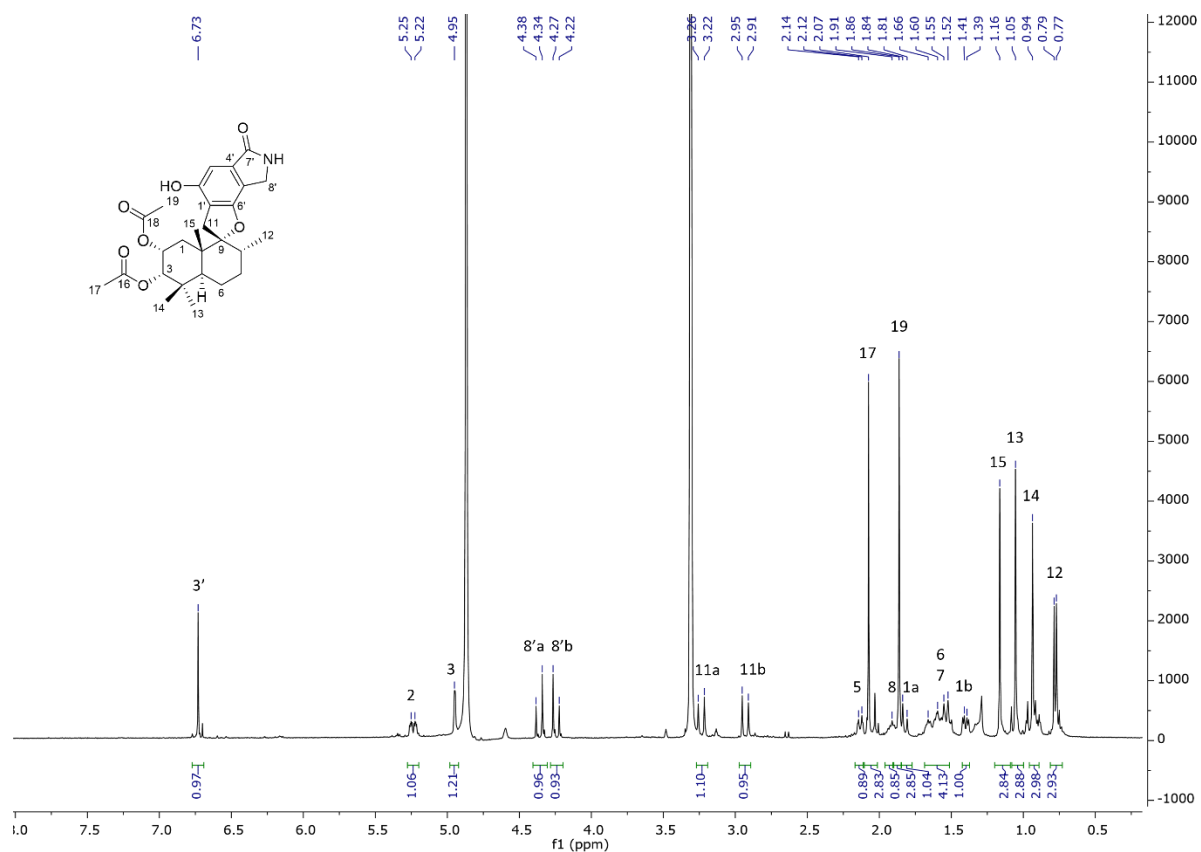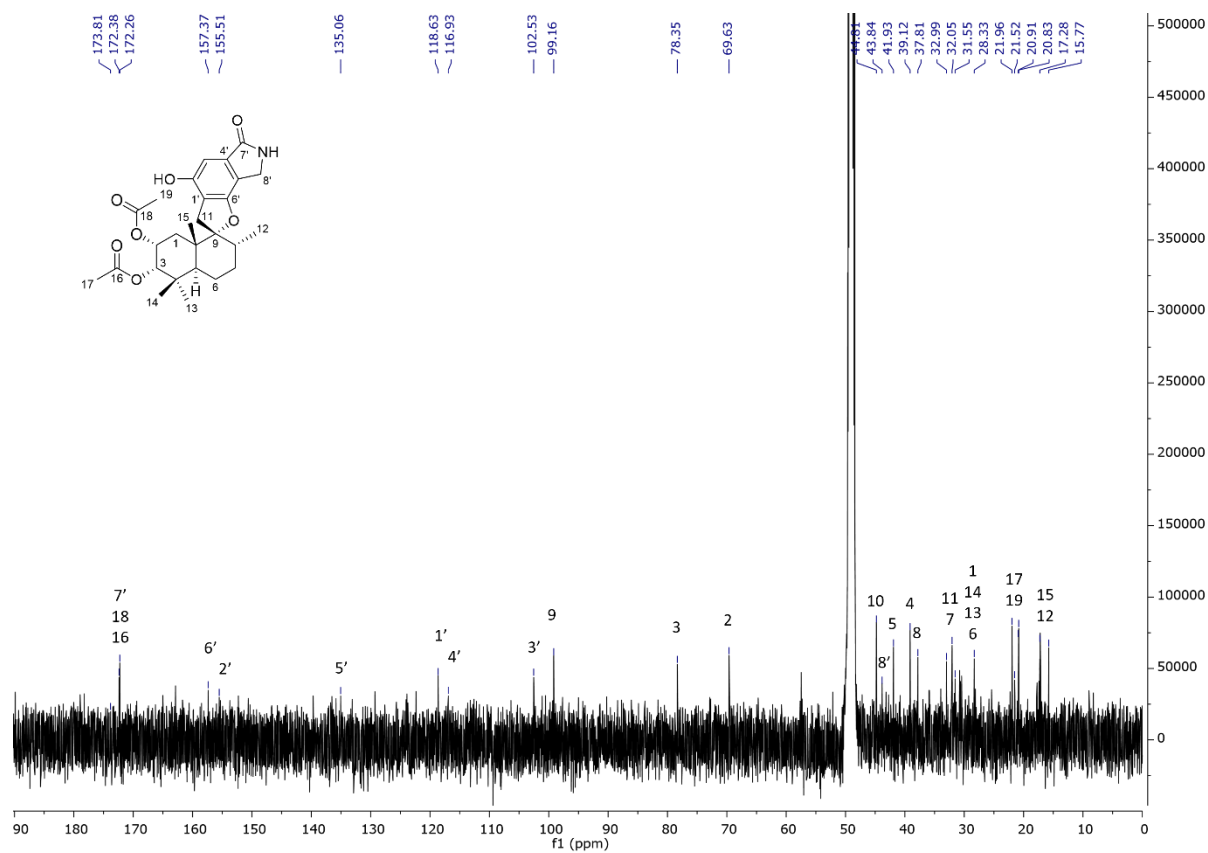

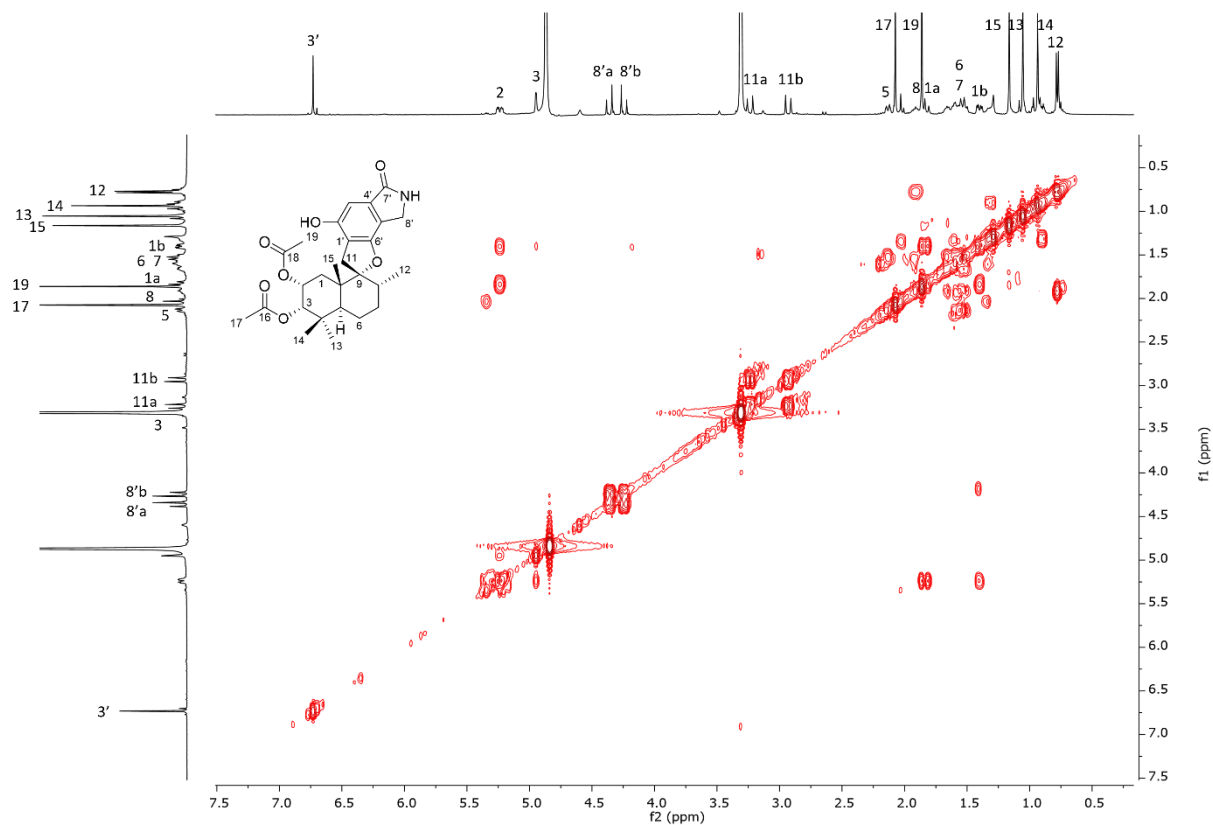

**Figure S50.**  $^1\text{H}$ - $^1\text{H}$  COSY NMR spectrum (500/500 MHz,  $\text{CD}_3\text{OD}$ ) of 2 $\alpha$ -acetoxystachybotrylactam acetate (7).

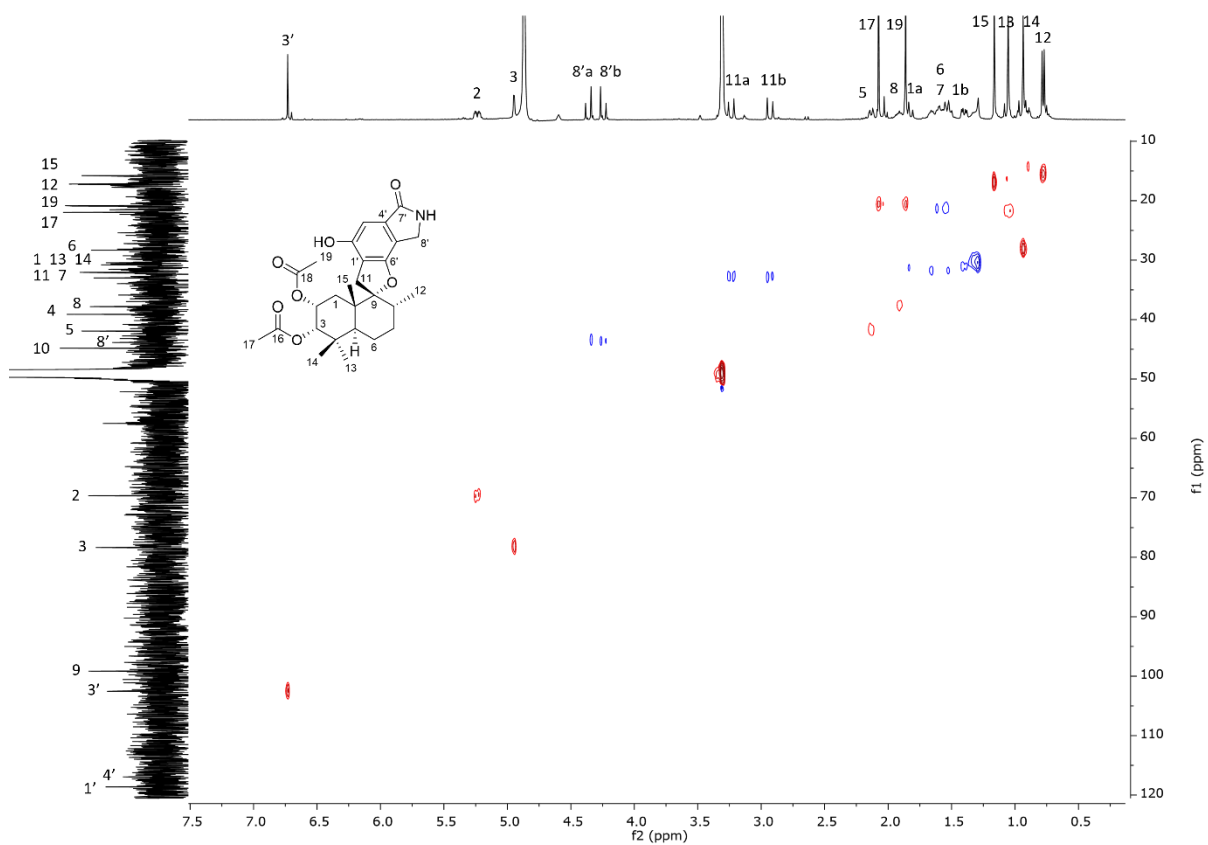

**Figure S51.**  $^1\text{H}$ - $^{13}\text{C}$  HSQC NMR spectrum (500/125 MHz,  $\text{CD}_3\text{OD}$ ) of 2 $\alpha$ -acetoxystachybotrylactam acetate (7).

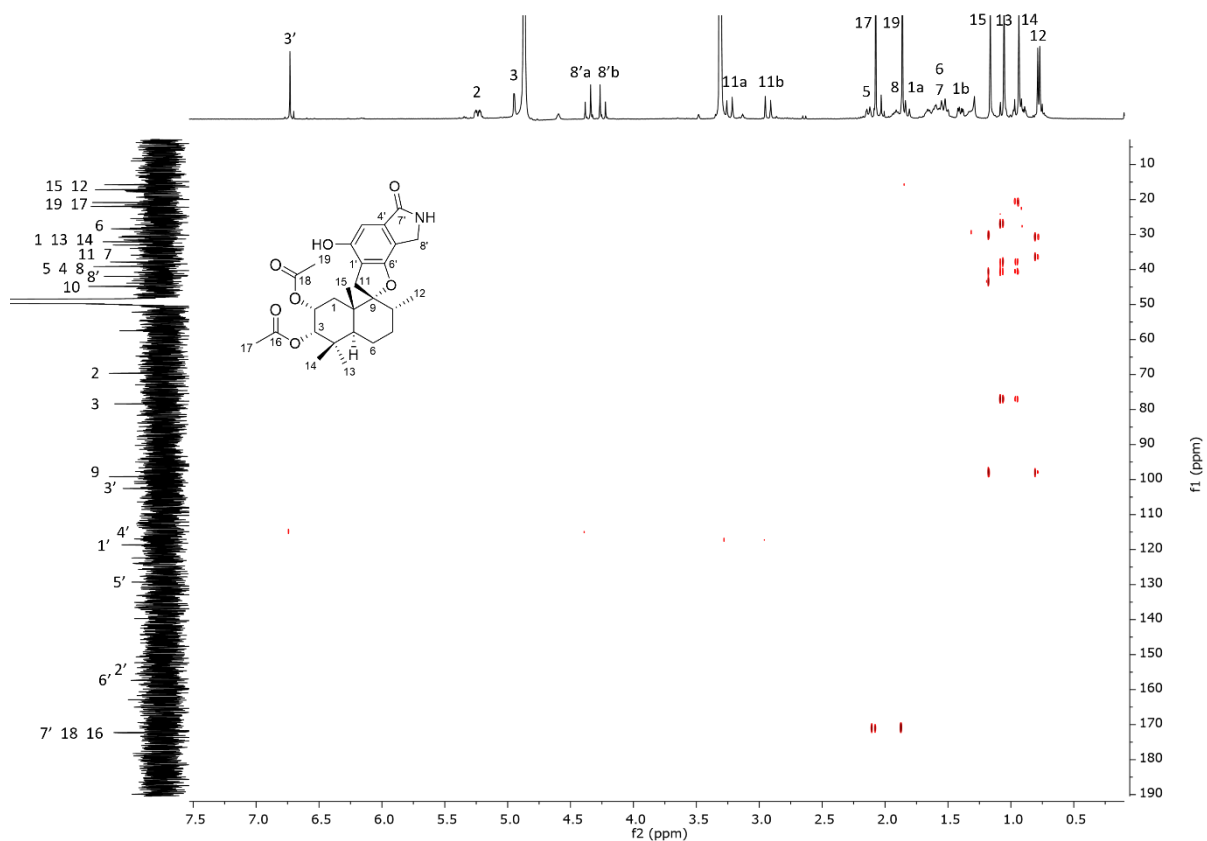

**Figure S52.**  $^1\text{H}$ - $^{13}\text{C}$  HMBC NMR spectrum (500/125 MHz,  $\text{CD}_3\text{OD}$ ) of 2 $\alpha$ -acetoxystachybotrylactam acetate (7).

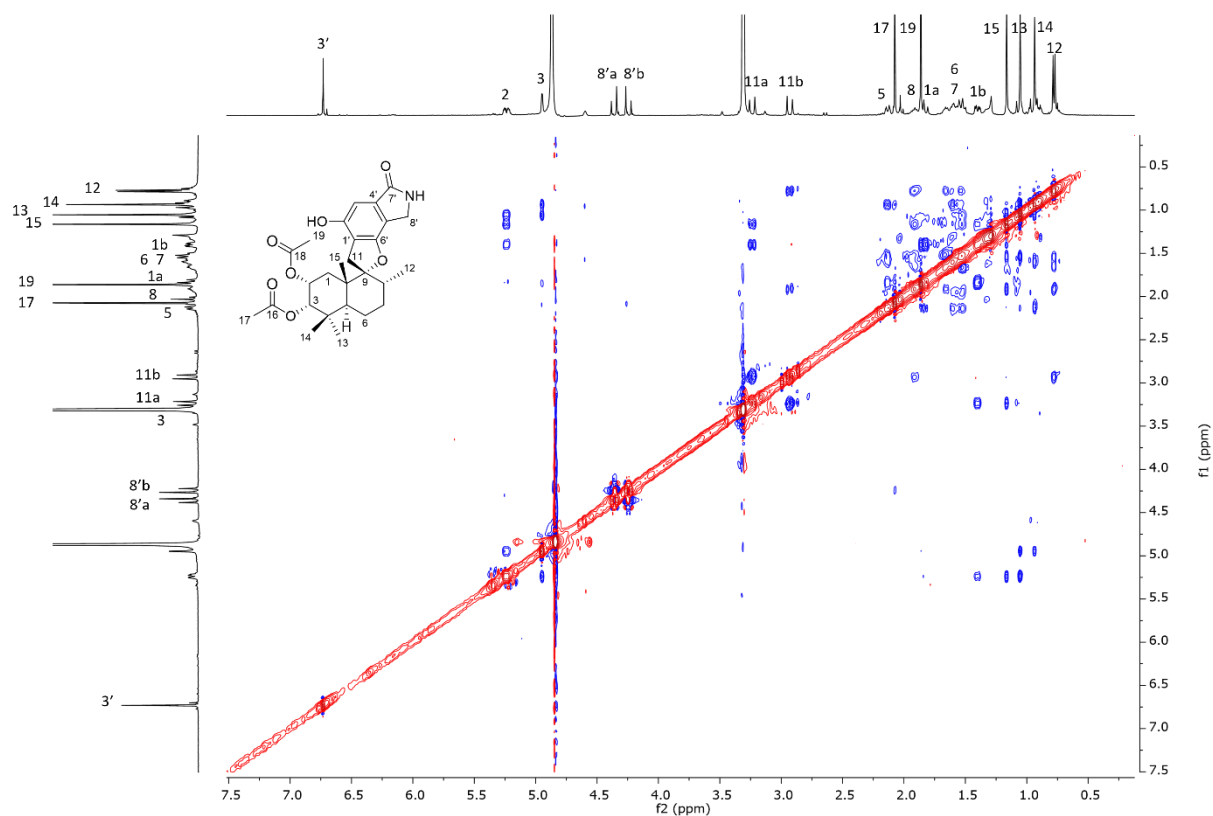

**Figure S53.**  $^1\text{H}$ - $^1\text{H}$  NOESY NMR spectrum (500/500 MHz,  $\text{CD}_3\text{OD}$ ) of 2 $\alpha$ -acetoxystachybotrylactam acetate (7).

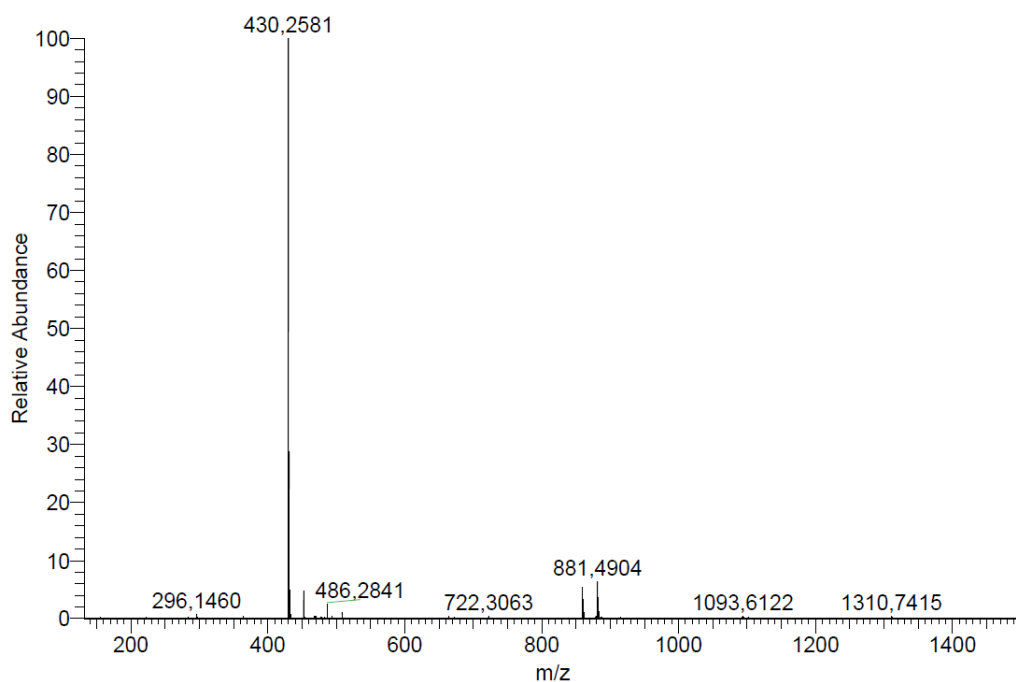

Figure S54. HRESI(+)-MS spectrum of stachybotramide (8).

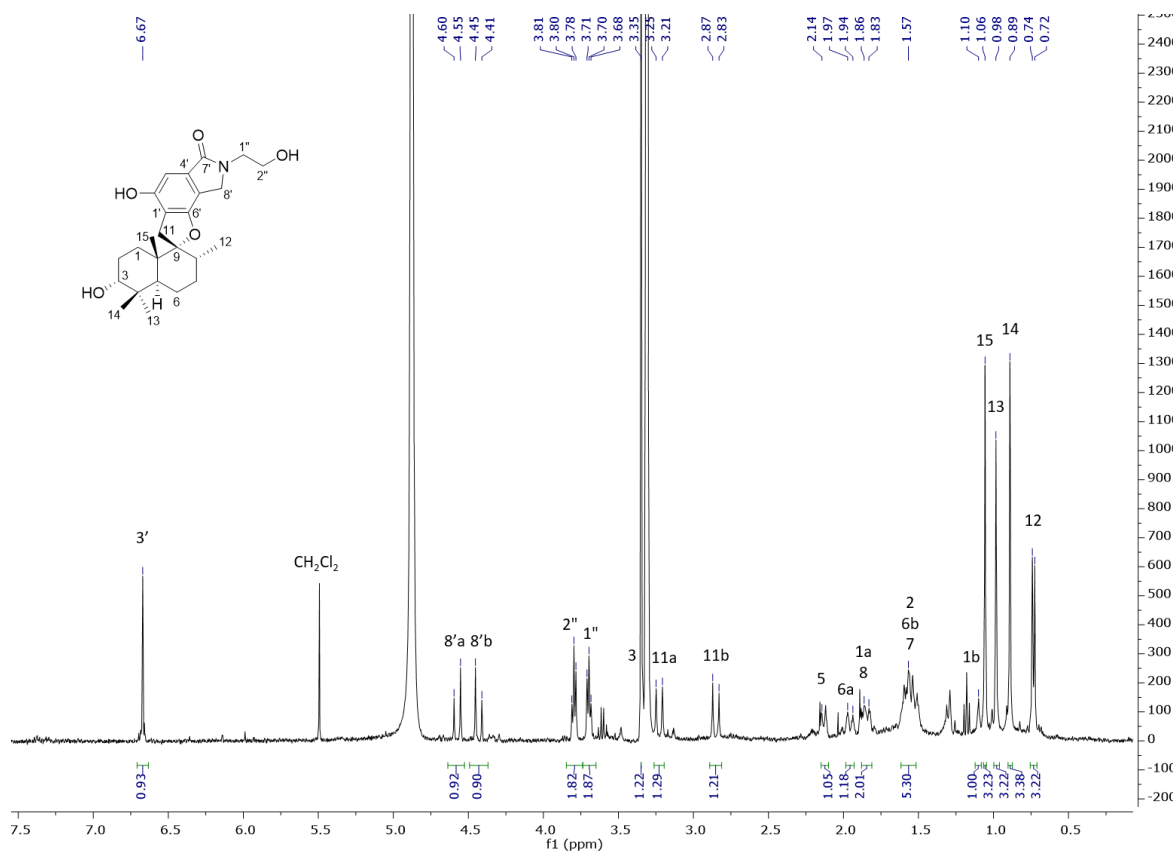

Figure S55.  $^1\text{H}$  NMR spectrum (500 MHz,  $\text{CD}_3\text{OD}$ ) of stachybotramide (8).

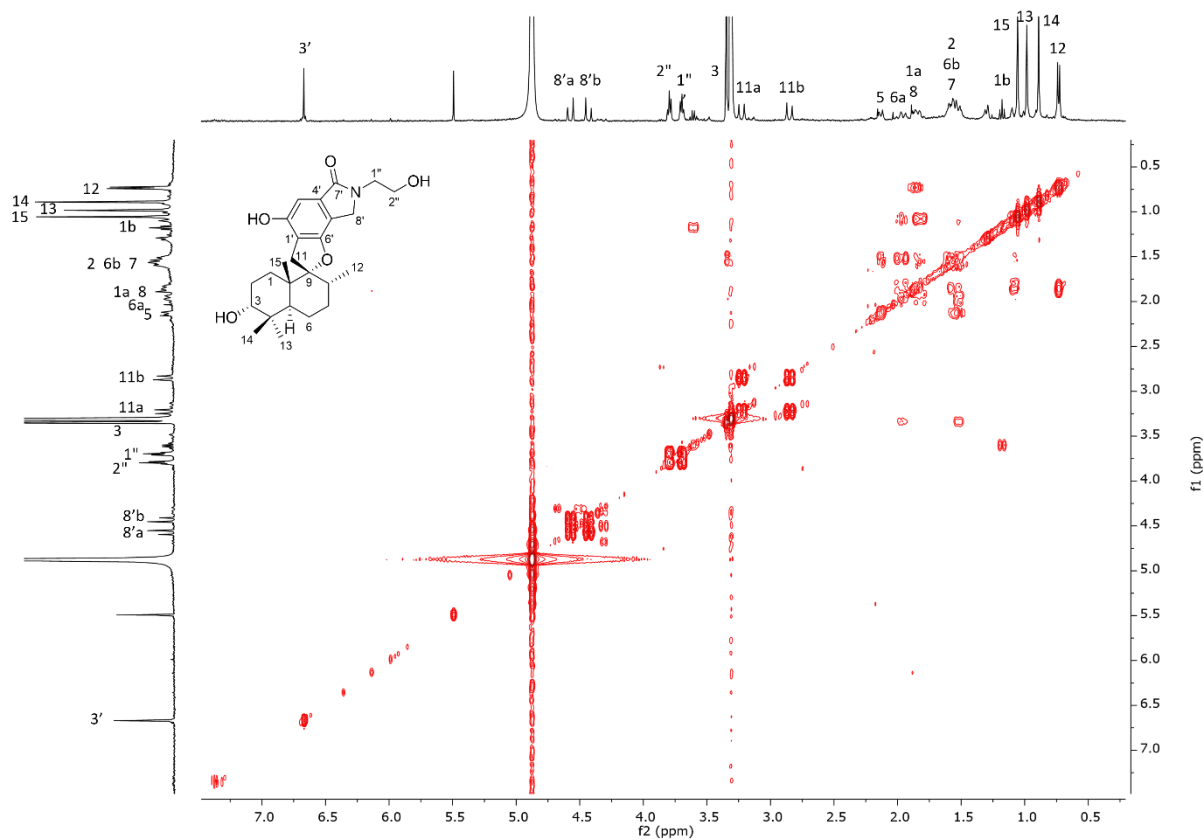

**Figure S56.**  $^1\text{H}$ - $^1\text{H}$  COSY NMR spectrum (500/500 MHz,  $\text{CD}_3\text{OD}$ ) of stachybotramide (**8**).

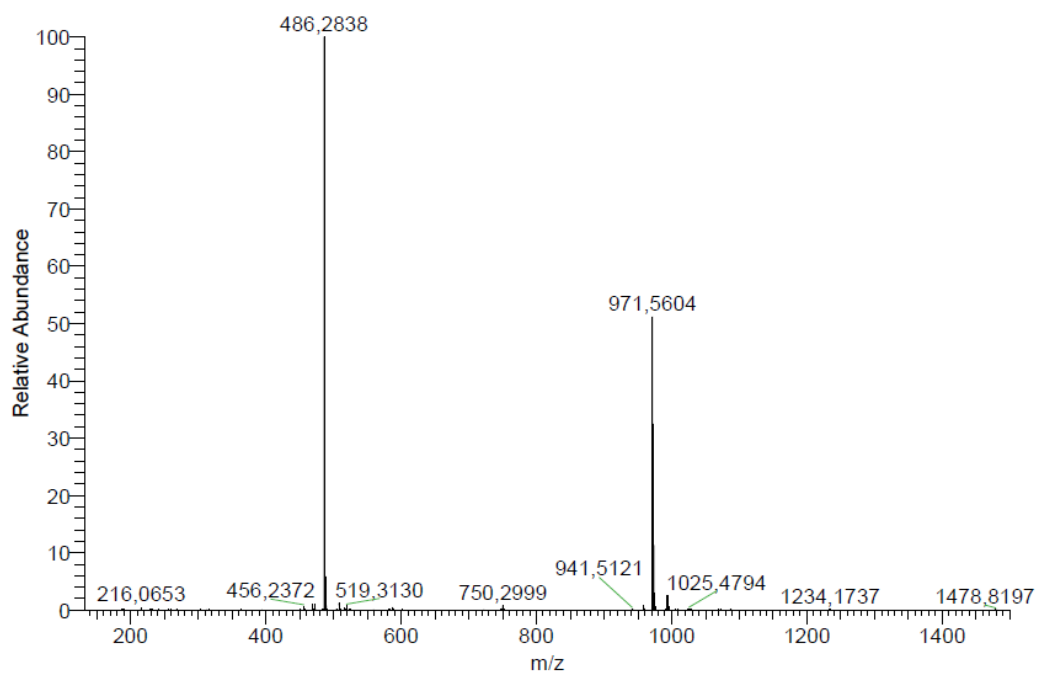

**Figure S57.** HRESI(+)MS spectrum of chartarlactam B (**9**).

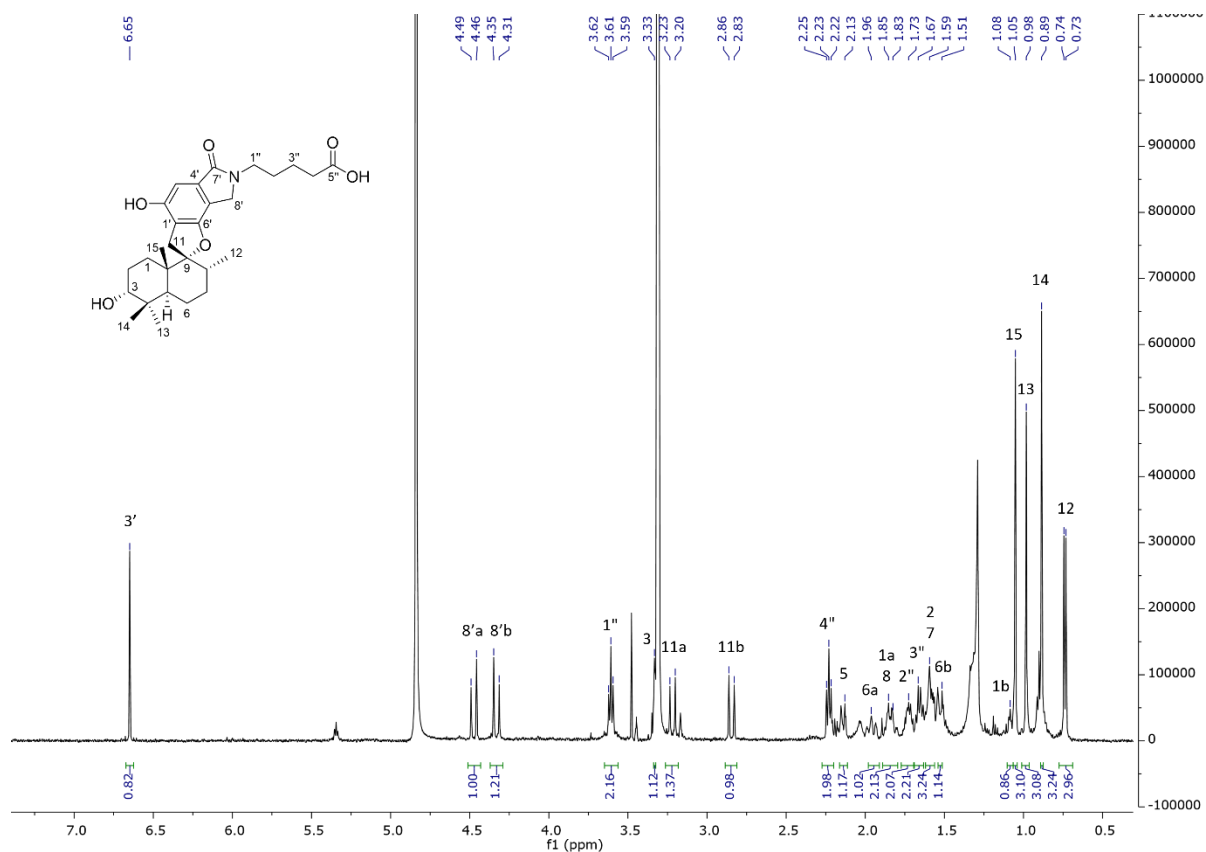

Figure S58. <sup>1</sup>H NMR spectrum (500 MHz, CD<sub>3</sub>OD) of chartarlactam B (9).

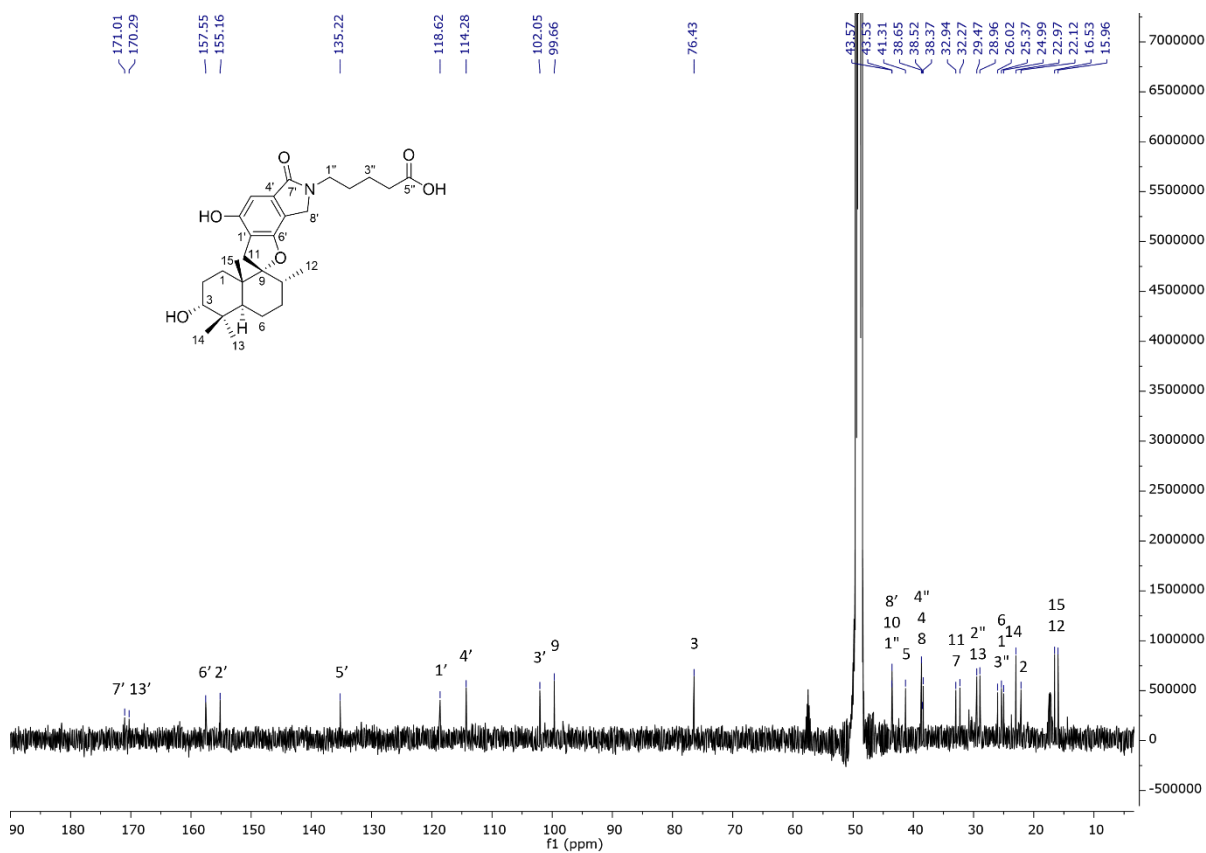

Figure S59. <sup>13</sup>C NMR spectrum (125 MHz, CD<sub>3</sub>OD) of chartarlactam B (9).

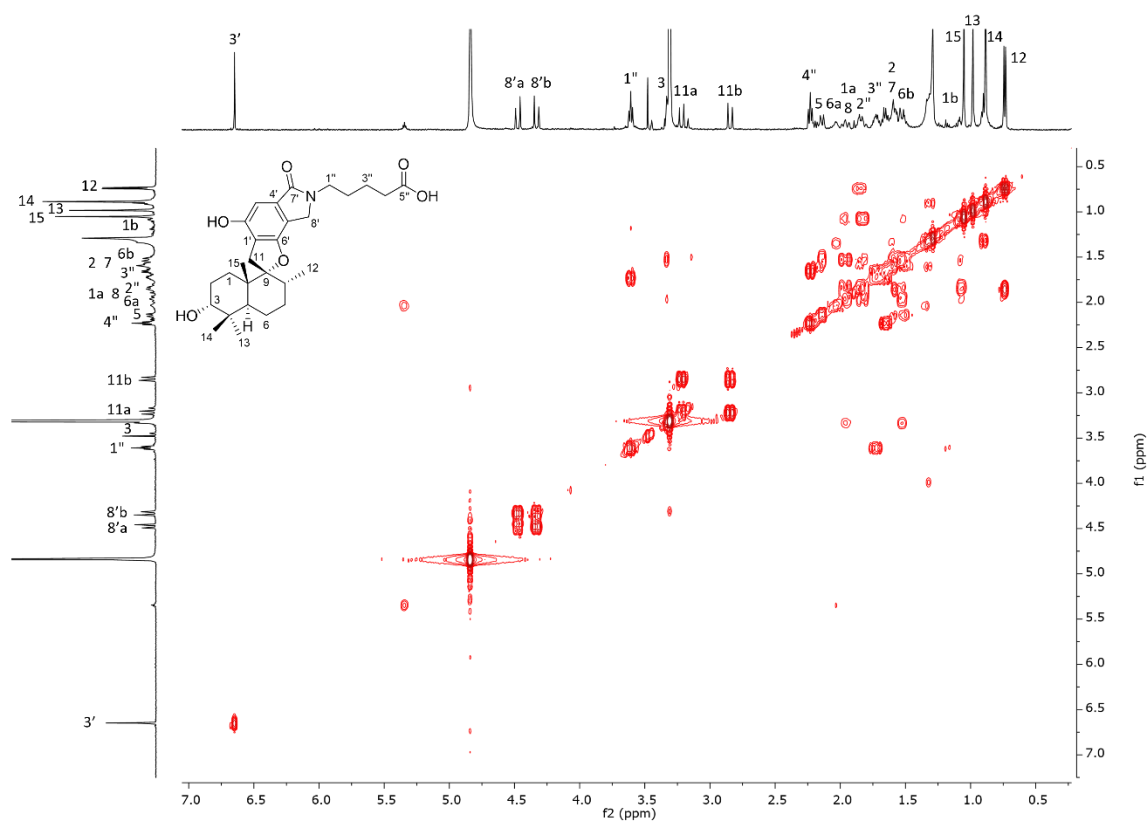

**Figure S60.**  $^1\text{H}$ - $^1\text{H}$  COSY NMR spectrum (500/500 MHz,  $\text{CD}_3\text{OD}$ ) of chartarlactam B (**9**).

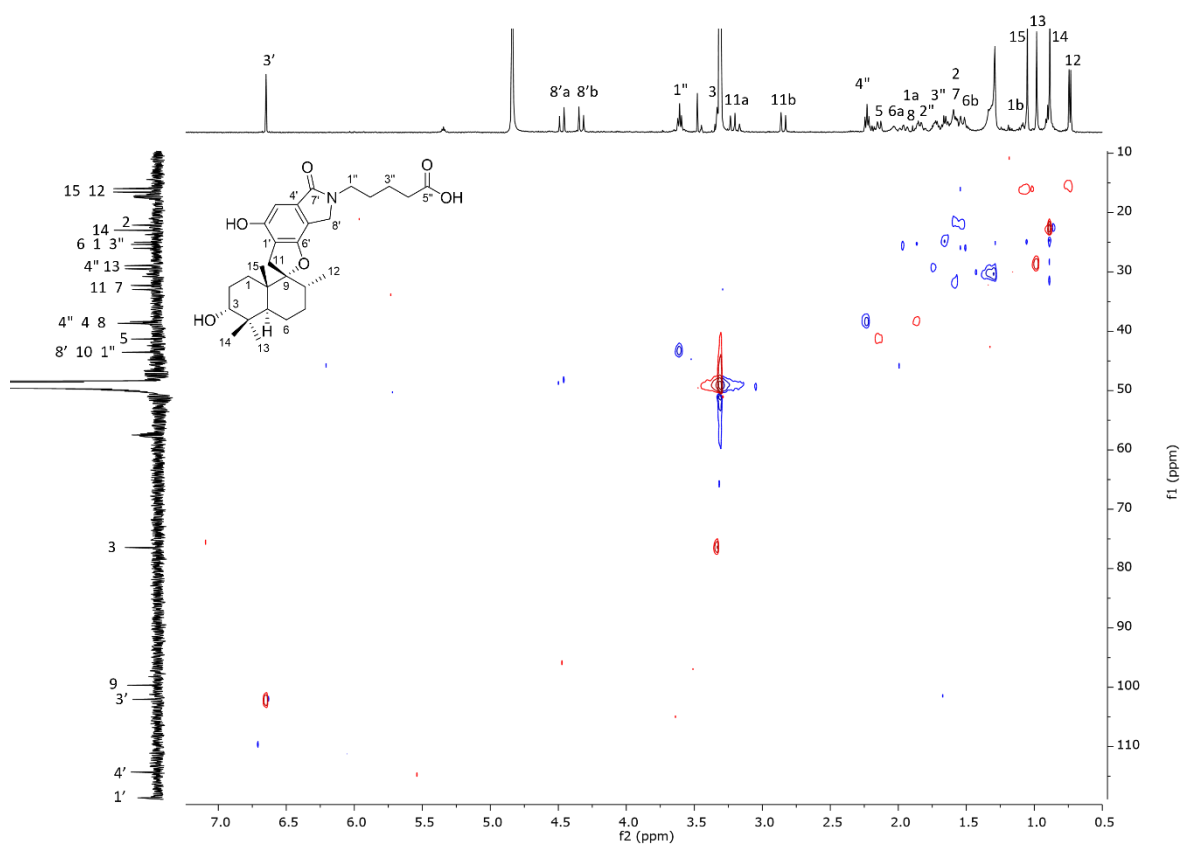

**Figure S61.**  $^1\text{H}$ - $^{13}\text{C}$  HSQC NMR spectrum (500/125 MHz,  $\text{CD}_3\text{OD}$ ) of chartarlactam B (**9**).





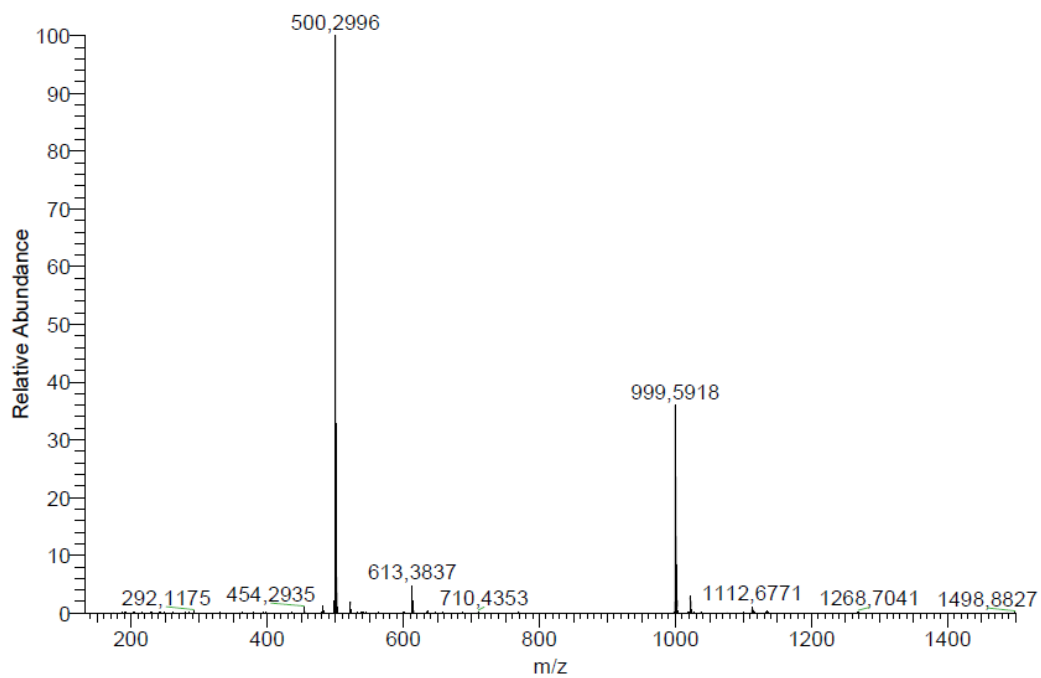

Figure S64. HRESI(+)-MS spectrum of F1839-J (10).

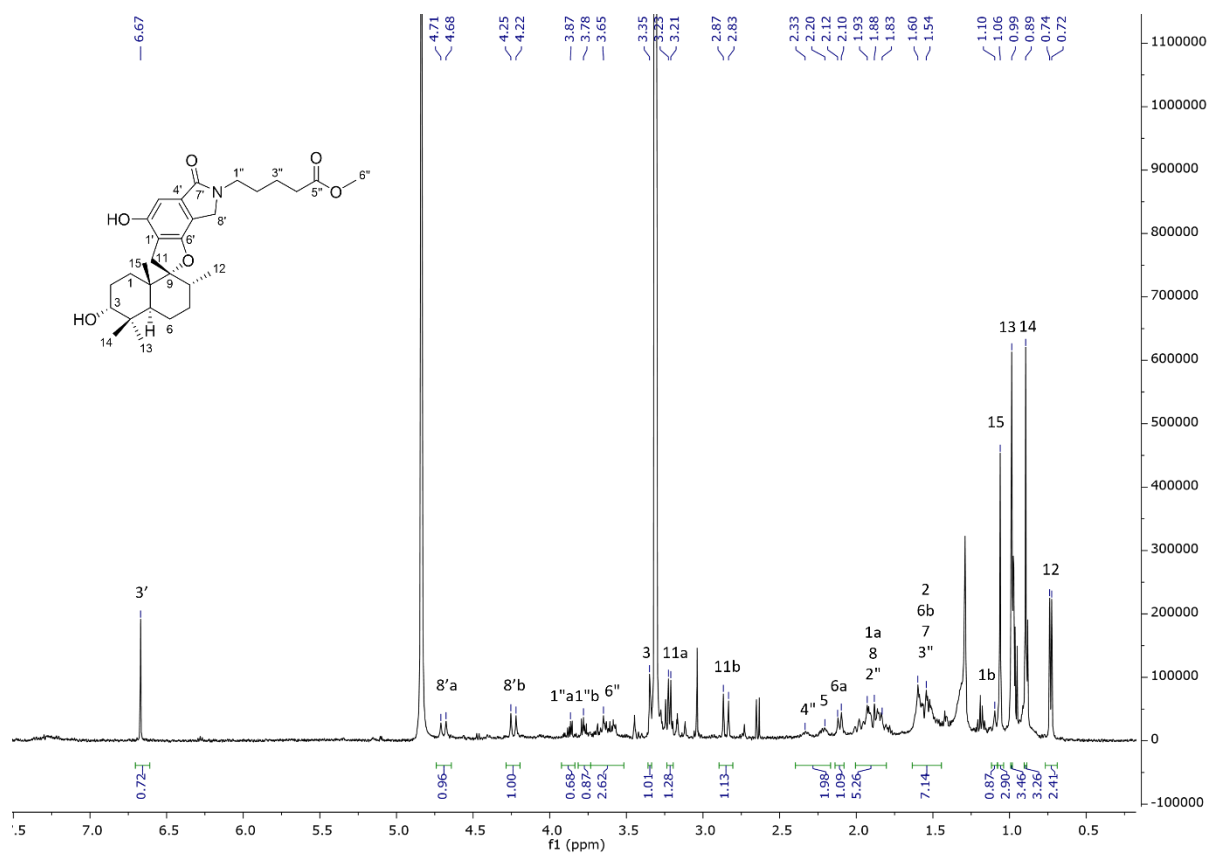

Figure S65. <sup>1</sup>H NMR spectrum (500 MHz, CD<sub>3</sub>OD) of F1839-J (10).

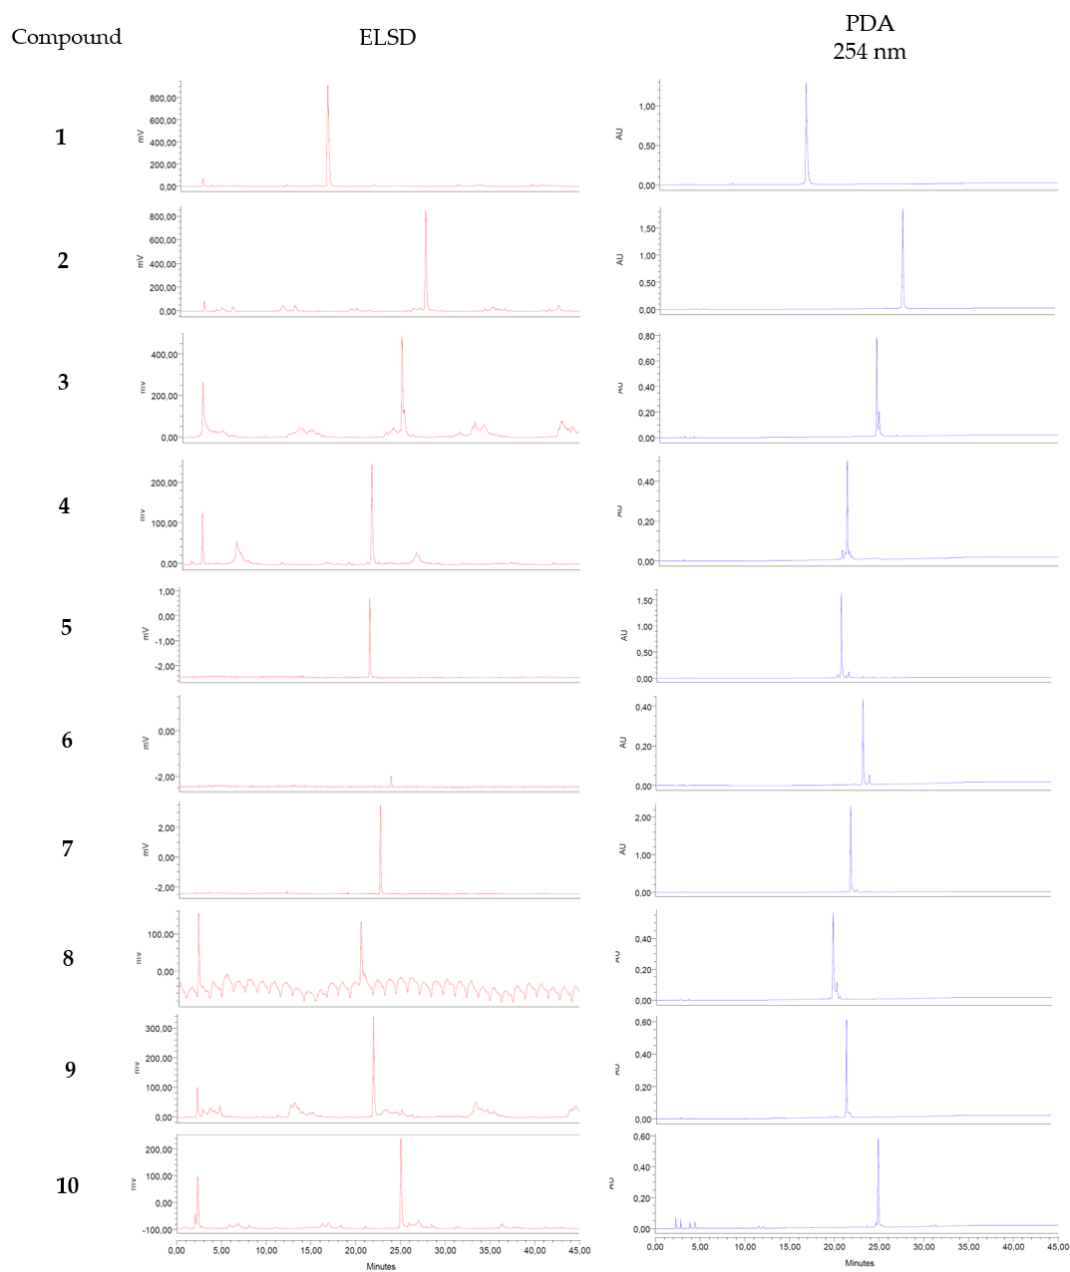

**Figure S66.** HPLC-PDA-ELSD chromatograms of compounds **1** – **10**.

## 2. NMR tables

**Table S1.**  $^1\text{H}$  and  $^{13}\text{C}$  NMR data of **1** (500/125 MHz,  $\text{CD}_3\text{OD}$ ) and synthetic stachybotry-arginine (600/150 MHz,  $(\text{CD}_3\text{OD})^{32}$ ).

| <b>1</b>    |                                 |                                       | <b>Stachybotry-arginine</b>     |                                       |
|-------------|---------------------------------|---------------------------------------|---------------------------------|---------------------------------------|
| N°          | $\delta_{\text{C}}$ (ppm)/mult. | $\delta_{\text{H}}$ (ppm)/mult./J(Hz) | $\delta_{\text{C}}$ (ppm)/mult. | $\delta_{\text{H}}$ (ppm)/mult./J(Hz) |
| 1 $\alpha$  | 25.3, CH <sub>2</sub>           | 1.09, m                               | 25.3, CH <sub>2</sub>           | 1.07, m                               |
| 1 $\beta$   |                                 | 1.90, m                               |                                 |                                       |
| 2           | 22.1, CH <sub>2</sub>           | 1.56, m                               | 22.1, CH <sub>2</sub>           | 1.52, m                               |
| 3           | 76.3, CH                        | 3.33, s                               | 76.3, CH                        | 3.33, s                               |
| 4           | 38.5, C                         | -                                     | 38.4, C                         | -                                     |
| 5           | 41.3, CH                        | 2.15, m                               | 41.3, CH                        | 2.13, m                               |
| 6 $\alpha$  | 26.1, CH                        | 1.90, m                               | 26.1, CH                        | 1.55, m                               |
| 6 $\beta$   |                                 | 1.56, m                               |                                 |                                       |
| 7           | 32.3, CH <sub>2</sub>           | 1.56, m                               | 32.3, CH <sub>2</sub>           | 1.59, m                               |
| 8           | 38.6, CH                        | 1.90, m                               | 38.6, CH                        | 1.88, m                               |
| 9           | 99.7, C                         | -                                     | 99.7, C                         | -                                     |
| 10          | 43.5, C                         | -                                     | 43.5, C                         | -                                     |
| 11 $\alpha$ | 33.0, CH <sub>2</sub>           | 3.24, d, 16.9                         | 33.0, CH <sub>2</sub>           | 3.22, d, 16.7                         |
| 11 $\beta$  |                                 | 2.86, d, 16.9                         |                                 | 2.84, d, 16.7                         |
| 12          | 16.0, CH <sub>3</sub>           | 0.74, d, 6.5                          | 16.0, CH <sub>3</sub>           | 0.73, d, 6.6                          |
| 13          | 29.0, CH <sub>3</sub>           | 0.98, s                               | 29.0, CH <sub>3</sub>           | 0.97, s                               |
| 14          | 23.0, CH <sub>3</sub>           | 0.89, s                               | 23.0, CH <sub>3</sub>           | 0.88, s                               |
| 15          | 16.6, CH <sub>3</sub>           | 1.06, s                               | 16.6, CH <sub>3</sub>           | 1.05, s                               |
| 1'          | 118.7, C                        | -                                     | 118.7, C                        | -                                     |
| 2'          | 155.1, C                        | -                                     | 155.1, C                        | -                                     |
| 3'          | 102.1, CH                       | 6.69, s                               | 102.1, CH                       | 6.67, s                               |
| 4'          | 114.9, C                        | -                                     | 114.9, C                        | -                                     |
| 5'          | 135.1, C                        | -                                     | 135.1, C                        | -                                     |
| 6'          | 157.6, C                        | -                                     | 157.6, C                        | -                                     |
| 7'          | 171.7, C                        | -                                     | 171.7, C                        | -                                     |
| 8'a         | 45.9, CH <sub>2</sub>           | 4.74, d, 17.2                         | 45.9, CH <sub>2</sub>           | 4.72, d, 17.2                         |
| 8'b         |                                 | 4.29, d, 17.2                         |                                 | 4.28, d, 17.2                         |
| 1''         | 170.3, C                        | -                                     | 177.4, C                        | -                                     |
| 2''         | 57.6, CH                        | 4.76, m                               | 57.7, CH                        | 4.75, m                               |
| 3''a        | 28.8, CH <sub>2</sub>           | 2.15, m                               | 28.8, CH <sub>2</sub>           | 2.15, m                               |
| 3''b        |                                 | 1.90, m                               |                                 |                                       |
| 4''         | 27.2, CH <sub>2</sub>           | 1.56, m                               | 27.2, CH <sub>2</sub>           | 1.55, m                               |
| 5''         | 41.9, CH <sub>2</sub>           | 3.24, m                               | 41.9, CH <sub>2</sub>           | 3.24, m                               |
| 6''         | 158.6, CH                       | -                                     | 158.6, CH                       | -                                     |

**Table S2.** <sup>1</sup>H and <sup>13</sup>C NMR data of **2** (500/125 MHz, (CD<sub>3</sub>)<sub>2</sub>SO) and stachybocin A (400/100 MHz, (CD<sub>3</sub>)<sub>2</sub>SO)<sup>33</sup>.

| <b>2</b>    |                            |                                  | <b>Stachybocin A</b>               |                                  |
|-------------|----------------------------|----------------------------------|------------------------------------|----------------------------------|
| N°          | δ <sub>C</sub> (ppm)/mult. | δ <sub>H</sub> (ppm)/mult./J(Hz) | δ <sub>C</sub> (ppm)/mult.         | δ <sub>H</sub> (ppm)/mult./J(Hz) |
| 1           | 167.9, C                   | -                                | 168.3, C                           | -                                |
| 2           | 134.1, C                   | -                                | 133.2, C                           | -                                |
| 3           | 100.9, CH                  | 6.54, s                          | 100.9, CH                          | 6.59                             |
| 4           | 154.0, C                   | -                                | 153.8, C                           | -                                |
| 5           | 116.4, C                   | -                                | 116.9, C                           | -                                |
| 6           | 155.9, C                   | -                                | 155.9, C                           | -                                |
| 7           | 112.4, C                   | -                                | 112.3, C                           | -                                |
| 8a          | 43.8, CH <sub>2</sub>      | 4.57, d, 16.6                    | 43.9, CH <sub>2</sub>              | 4.28                             |
| 8b          |                            | 4.06, d, 16.6                    |                                    |                                  |
| 9 $\alpha$  | 31.9, CH <sub>2</sub>      | 3.10, dd, 16.6, 6.9              | 31.7, CH <sub>2</sub>              | 3.11                             |
| 9 $\beta$   |                            | 2.73, dd, 16.6, 6.9              |                                    |                                  |
| 10          | 97.8, C                    | -                                | 98.3, C                            | -                                |
| 11          | 36.7, CH                   | 1.76, m                          | 36.6, CH                           | 1.77                             |
| 12 $\alpha$ | 30.8, CH <sub>2</sub>      | 1.41, m                          | 30.7, CH <sub>2</sub>              | 1.36                             |
| 12 $\beta$  |                            | 1.50, m                          |                                    |                                  |
| 13          | 20.5, CH <sub>2</sub>      | 1.41, m                          | 20.4, CH <sub>2</sub>              | 1.46                             |
|             |                            |                                  |                                    | 1.38                             |
| 14          | 39.4, CH                   | 2.02, m                          | 39.4, CH                           | 2.01                             |
| 15          | 41.8, C                    | -                                | 41.8, C                            | -                                |
| 16 $\alpha$ | 23.9, CH <sub>2</sub>      | 1.15, m                          | 23.8, CH <sub>2</sub>              | 0.92                             |
| 16 $\beta$  |                            | 1.76, m                          |                                    |                                  |
| 17 $\alpha$ | 25.0, CH <sub>2</sub>      | 1.41, m                          | 24.9, CH <sub>2</sub>              | 1.39                             |
| 17 $\beta$  |                            | 1.76, m                          |                                    |                                  |
| 18          | 73.5, CH                   | 3.16, m                          | 73.5, CH                           | 3.18                             |
| 19          | 37.4, C                    | -                                | 37.3, C                            | -                                |
| 20          | 15.7, CH <sub>3</sub>      | 0.63, d, 6.4                     | 15.5, CH <sub>3</sub>              | 0.64                             |
| 21          | 15.9, CH <sub>3</sub>      | 0.93, s                          | 15.8, CH <sub>3</sub>              | 0.94                             |
| 22          | 28.8, CH <sub>3</sub>      | 0.87, s                          | 28.6, CH <sub>3</sub> <sup>a</sup> | 0.88 <sup>a</sup>                |
| 23          | 22.5, CH <sub>3</sub>      | 0.78, s                          | 22.4, CH <sub>3</sub> <sup>a</sup> | 0.79 <sup>a</sup>                |
| 1''         | 166.1, C                   | -                                | 172.8, C                           | -                                |
| 2''         | 56.2, CH                   | 4.36, dd, 10.9, 4.5              | 53.5, CH                           | 4.71                             |
| 3''a        | 24.3, CH <sub>2</sub>      | 2.02, m                          | 28.5, CH <sub>2</sub>              | 2.03                             |
| 3''b        |                            | 1.76, m                          |                                    |                                  |
| 4''         | 29.1, CH <sub>2</sub>      | 1.23, m                          | 23.4, CH <sub>2</sub>              | 1.23                             |
| 5''         | 27.6, CH <sub>2</sub>      | 1.60, m                          | 27.2, CH <sub>2</sub>              | 1.64                             |
| 6''a        | 41.7, CH <sub>2</sub>      | 3.41, m                          | 41.4, CH <sub>2</sub>              | 3.43                             |
| 6''b        |                            |                                  |                                    | 3.38                             |

| 2            |                        |                              | Stachybocine A                     |                              |
|--------------|------------------------|------------------------------|------------------------------------|------------------------------|
| N°           | $\delta_C$ (ppm)/mult. | $\delta_H$ (ppm)/mult./J(Hz) | $\delta_C$ (ppm)/mult.             | $\delta_H$ (ppm)/mult./J(Hz) |
| 1'           | 167.4, C               | -                            | 167.4, C                           | -                            |
| 2'           | 134.8, C               | -                            | 134.1, C                           | -                            |
| 3'           | 100.7, CH              | 6.53, s                      | 100.8, CH                          | 6.53                         |
| 4'           | 153.6, C               | -                            | 153.7, C                           | -                            |
| 5'           | 115.9, C               | -                            | 116.4, C                           | -                            |
| 6'           | 155.8, C               | -                            | 155.8, C                           | -                            |
| 7'           | 111.6, C               | -                            | 111.9, C                           | -                            |
| 8'a          | 46.6, CH <sub>2</sub>  | 4.27, d, 16.9                | 46.6, CH <sub>2</sub>              | 4.18                         |
| 8'b          |                        | 4.16, d, 16.9                |                                    |                              |
| 9' $\alpha$  | 31.8, CH <sub>2</sub>  | 3.10, dd, 16.6, 6.9          | 31.7, CH <sub>2</sub>              | 3.11                         |
| 9' $\beta$   |                        | 2.73, dd, 16.6, 6.9          |                                    |                              |
| 10'          | 97.6, C                | -                            | 97.8, C                            | -                            |
| 11'          | 36.5, CH               | 1.76, m                      | 36.5, CH                           | 1.77                         |
| 12' $\alpha$ | 30.8, CH <sub>2</sub>  | 1.41, m                      | 30.8, CH <sub>2</sub>              | 1.36                         |
| 12' $\beta$  |                        | 1.50, m                      |                                    |                              |
| 13           | 20.5, CH <sub>2</sub>  | 1.41, m                      | 20.4, CH <sub>2</sub>              | 1.46                         |
|              |                        |                              |                                    | 1.38                         |
| 14'          | 39.4, CH               | 2.02, m                      | 39.4, CH                           | 2.01                         |
| 15'          | 41.8, C                | -                            | 41.8, C                            | -                            |
| 16' $\alpha$ | 23.9, CH <sub>2</sub>  | 1.15, m                      | 23.8, CH <sub>2</sub>              | 0.92                         |
| 16' $\beta$  |                        | 1.76, m                      |                                    |                              |
| 17' $\alpha$ | 24.9, CH <sub>2</sub>  | 1.41, m                      | 24.8, CH <sub>2</sub>              | 1.39                         |
| 17' $\beta$  |                        | 1.76, m                      |                                    |                              |
| 18'          | 73.5, CH               | 3.16, m                      | 73.5, CH                           | 3.18                         |
| 19'          | 37.3, C                | -                            | 37.3, C                            | -                            |
| 20'          | 15.6, CH <sub>3</sub>  | 0.63, d, 6.4                 | 15.5, CH <sub>3</sub>              | 0.64                         |
| 21'          | 15.8, CH <sub>3</sub>  | 0.93, s                      | 15.8, CH <sub>3</sub>              | 0.94                         |
| 22'          | 28.8, CH <sub>3</sub>  | 0.87, s                      | 28.6, CH <sub>3</sub> <sup>b</sup> | 0.88 <sup>b</sup>            |
| 23'          | 22.4, CH <sub>3</sub>  | 0.78, s                      | 22.4, CH <sub>3</sub> <sup>b</sup> | 0.79 <sup>b</sup>            |

<sup>a</sup> <sup>1</sup>H and <sup>13</sup>C chemical shifts for 22 and 23 were probably inverted by Ogawa *et al.*<sup>6</sup>.

<sup>b</sup> <sup>1</sup>H and <sup>13</sup>C chemical shifts for 22' and 23' were probably inverted by Ogawa *et al.*<sup>6</sup>.

**Table S3.**  $^1\text{H}$  and  $^{13}\text{C}$  NMR data of **3** (500/125 MHz,  $\text{CD}_3\text{OD}$ ) and stachybotrin I (400/100 MHz,  $(\text{CD}_3)_2\text{SO}$ )<sup>35</sup>.

| <b>3</b>       |                                 |                                       | <b>Stachybotrin I</b>                |                                       |
|----------------|---------------------------------|---------------------------------------|--------------------------------------|---------------------------------------|
| N <sup>o</sup> | $\delta_{\text{C}}$ (ppm)/mult. | $\delta_{\text{H}}$ (ppm)/mult./J(Hz) | $\delta_{\text{C}}$ (ppm)/mult.      | $\delta_{\text{H}}$ (ppm)/mult./J(Hz) |
| 1 $\alpha$     | 25.4, CH <sub>2</sub>           | 1.09, m                               | 23.8 <sup>a</sup> , CH <sub>2</sub>  | 0.92 <sup>c</sup>                     |
| 1 $\beta$      |                                 | 1.84, m                               |                                      | 1.73 <sup>c</sup>                     |
| 2              | 22.1, CH <sub>2</sub>           | 1.55, m                               | 24.8 <sup>a</sup> , CH <sub>2</sub>  | 1.40                                  |
| 3              | 76.4, CH                        | 3.35, s                               | 73.3 <sup>a</sup> , CH               | 1.81 <sup>c</sup>                     |
| 4              | 38.6, C                         | -                                     | n.d <sup>b</sup>                     | 3.18 <sup>c</sup>                     |
| 5              | 41.3, CH                        | 2.13, m                               | 39.3 <sup>a</sup> , CH               | -                                     |
| 6 $\alpha$     | 26.1, CH                        | 1.96, m                               | 20.4 <sup>a</sup> , CH               | 2.01 <sup>c</sup>                     |
| 6 $\beta$      |                                 | 1.55, m                               |                                      | 1.46 <sup>c</sup>                     |
| 7              | 32.3, CH <sub>2</sub>           | 1.55, m                               | 30.7 <sup>a</sup> , CH <sub>2</sub>  | 1.4 <sup>c</sup>                      |
| 8              | 38.5, CH                        | 1.84, m                               | 36.4 <sup>a</sup> , CH               | 1.39                                  |
| 9              | 99.5, C                         | -                                     | n.d <sup>b</sup>                     | 1.53                                  |
| 10             | 43.5, C                         | -                                     | n.d <sup>b</sup>                     | 1.77 <sup>c</sup>                     |
| 11 $\alpha$    | 33.0, CH <sub>2</sub>           | 3.17, d, 16.8                         | 31.6 <sup>a</sup> , CH <sub>2</sub>  | -                                     |
| 11 $\beta$     |                                 | 2.80, d, 16.8                         |                                      | 3.10 <sup>c</sup>                     |
| 12             | 16.0, CH <sub>3</sub>           | 0.67, d, 6.5                          | 15.5 <sup>a</sup> , CH <sub>3</sub>  | 2.73 <sup>c</sup>                     |
| 13             | 29.0, CH <sub>3</sub>           | 0.98, s                               | 28.6 <sup>a</sup> , CH <sub>3</sub>  | 0.59 <sup>c</sup>                     |
| 14             | 23.0, CH <sub>3</sub>           | 0.88, s                               | 22.3 <sup>a</sup> , CH <sub>3</sub>  | 0.88 <sup>c</sup>                     |
| 15             | 16.6, CH <sub>3</sub>           | 1.04, s                               | 15.8 <sup>a</sup> , CH <sub>3</sub>  | 0.79 <sup>c</sup>                     |
| 1'             | 118.5, C                        | -                                     | n.d <sup>b</sup>                     | 0.94 <sup>c</sup>                     |
| 2'             | 154.8, C                        | -                                     | n.d <sup>b</sup>                     | -                                     |
| 3'             | 102.0, CH                       | 6.57, s                               | 100.8 <sup>a</sup> , CH              | -                                     |
| 4'             | 114.9, C                        | -                                     | n.d.                                 | 6.49 <sup>c</sup>                     |
| 5'             | 135.3, C                        | -                                     | n.d.                                 | -                                     |
| 6'             | 157.5, C                        | -                                     | n.d.                                 | -                                     |
| 7'             | 174.5, C                        | -                                     | n.d.                                 | -                                     |
| 8'a            | 46.3, CH <sub>2</sub>           | 4.67, d, 17.0                         | 44.30 <sup>a</sup> , CH <sub>2</sub> | 4.26 <sup>c</sup>                     |
| 8'b            |                                 | 4.22, d, 17.0                         |                                      | 4.26 <sup>c</sup>                     |
| 1''            | 170.3, C                        | -                                     | n.d <sup>b</sup>                     | -                                     |
| 2''            | 59.7, CH                        | 5.13, m                               | 54.5 <sup>a</sup> , CH               | -                                     |
| 3''a           | 38.0, CH <sub>2</sub>           | 3.54, m                               | 34.4 <sup>a</sup> , CH <sub>2</sub>  | 5.11 <sup>c</sup>                     |
| 3''b           |                                 | 3.21, m                               |                                      | 3.33 <sup>c</sup>                     |
| 4''            | 140.2, C                        | -                                     | n.d <sup>b</sup>                     | 3.27 <sup>c</sup>                     |
| 5''            | 129.6, CH                       | 7.26, d, 7.3                          | 128.2 <sup>a</sup> , CH              | -                                     |
| 6''            | 129.4, CH                       | 7.19, t, 7.3                          | 128.4 <sup>a</sup> , CH              | 7.22 <sup>c</sup>                     |
| 7''            | 127.3, CH                       | 7.10, t, 7.3                          | 126.4 <sup>a</sup> , CH              | 7.25 <sup>c</sup>                     |
|                |                                 |                                       |                                      | 7.14 <sup>c</sup>                     |

<sup>a</sup>  $^{13}\text{C}$  chemical shifts were determined from the HMQC spectrum.<sup>b</sup>  $^{13}\text{C}$  chemical shifts were not determined for quaternary carbons.<sup>c</sup> Multiplicity were not reported for the protons in the  $^1\text{H}$  NMR spectrum.

**Table S4.** <sup>1</sup>H and <sup>13</sup>C NMR data of **4** (500/125 MHz, CD<sub>3</sub>OD) and stachybotrin H (400/100 MHz, (CD<sub>3</sub>)<sub>2</sub>SO)<sup>37</sup>.

| <b>4</b> |                            |                                  | <b>Stachybotrin H</b>      |                                  |
|----------|----------------------------|----------------------------------|----------------------------|----------------------------------|
| N°       | δ <sub>C</sub> (ppm)/mult. | δ <sub>H</sub> (ppm)/mult./J(Hz) | δ <sub>C</sub> (ppm)/mult. | δ <sub>H</sub> (ppm)/mult./J(Hz) |
| 1α       | 25.4, CH <sub>2</sub>      | 1.09, m                          | 24.3, CH <sub>2</sub>      | 0.93, m                          |
| 1β       |                            | 1.86, m                          |                            | 1.76, m                          |
| 2        | 22.1, CH <sub>2</sub>      | 1.64, m                          | 25.3, CH <sub>2</sub>      | 1.35, m                          |
| 3        | 76.5, CH                   | 3.33, s                          | 73.9, CH                   | 1.73, m                          |
| 4        | 38.6, C                    | -                                | 36.9, C                    | 3.17, bs                         |
| 5        | 41.3, CH                   | 2.14, m                          | 40.5, CH                   | -                                |
| 6α       | 26.1, CH <sub>2</sub>      | 1.96, m                          | 20.9, CH                   | 2.02, d, 8.9                     |
| 6β       |                            | 1.59, m                          |                            | 1.44, m                          |
| 7        | 32.3, CH <sub>2</sub>      | 1.59, m                          | 31.3, CH <sub>2</sub>      | 1.40, m                          |
| 8        | 38.4, CH                   | 1.86, m                          | 37.7, CH                   | 1.53, m                          |
| 9        | 99.6, C                    | -                                | 98.3, C                    | 1.37, m                          |
| 10       | 43.5, C                    | -                                | 42.2, C                    | 1.78, m                          |
| 11α      | 33.0, CH <sub>2</sub>      | 3.22, d, 16.8                    | 32.1, CH <sub>2</sub>      | 98.3, C                          |
| 11β      |                            | 2.84, d, 16.8                    |                            | 42.2, C                          |
| 12       | 15.9, CH <sub>3</sub>      | 0.73, d, 6.5                     | 15.9, CH <sub>3</sub>      | 3.12, d, 17.0                    |
| 13       | 28.9, CH <sub>3</sub>      | 0.98, s                          | 29.1, CH <sub>3</sub>      | 2.76, d, 17.0                    |
| 14       | 23.0, CH <sub>3</sub>      | 0.88, s                          | 22.8, CH <sub>3</sub>      | 0.65, d, 6.4                     |
| 15       | 16.6, CH <sub>3</sub>      | 1.05, s                          | 16.2, CH <sub>3</sub>      | 0.87, s                          |
| 1'       | 118.6, C                   | -                                | 117.1, C                   | 0.79, s                          |
| 2'       | 155.1, C                   | -                                | 154.2, C                   | 0.95, s                          |
| 3'       | 102.2, CH                  | 6.68, s                          | 101.4, CH                  | -                                |
| 4'       | 114.8, C                   | -                                | 112.6, C <sup>a</sup>      | 6.57, s                          |
| 5'       | 135.2, C                   | -                                | 133.9, C <sup>a</sup>      | -                                |
| 6'       | 157.5, C                   | -                                | 156.3, C                   | -                                |
| 7'       | 174.7, C                   | -                                | 168.2, C <sup>b</sup>      | -                                |
| 8'a      | 47.4, CH <sub>2</sub>      | 4.23, d, 17.0                    | 47.8, CH <sub>2</sub>      | 4.30, s                          |
| 8'b      |                            | 4.07, d, 17.0                    |                            |                                  |
| 1''      | 170.4, C                   | -                                | 171.4, C <sup>b</sup>      | -                                |
| 2''      | 49.3, CH <sub>2</sub>      | 4.48, m                          | 44.3, CH <sub>2</sub>      | 4.14, d, 17.6                    |
|          |                            |                                  |                            | 4.10, d, 17.6                    |

<sup>a</sup> <sup>13</sup>C chemical shifts for 5' and 6' were probably inverted by Ma *et al.*<sup>4</sup>.<sup>b</sup> <sup>13</sup>C chemical shifts for 7' and 1'' were probably inverted by Ma *et al.*<sup>4</sup>.

**Table S5.**  $^1\text{H}$  and  $^{13}\text{C}$  NMR data of **5** (500/125 MHz,  $\text{CD}_3\text{OD}$ ) and stachybotrylactam ( $(\text{CD}_3)_2\text{CO}$ , 200 MHz;  $\text{CDCl}_3$ , 50 MHz)<sup>36</sup>.

| <b>5</b>    |                                 |                                       | <b>Stachybotrylactam</b>        |                                       |
|-------------|---------------------------------|---------------------------------------|---------------------------------|---------------------------------------|
| N°          | $\delta_{\text{C}}$ (ppm)/mult. | $\delta_{\text{H}}$ (ppm)/mult./J(Hz) | $\delta_{\text{C}}$ (ppm)/mult. | $\delta_{\text{H}}$ (ppm)/mult./J(Hz) |
| 1 $\alpha$  | 25.4, CH <sub>2</sub>           | 1.06, m                               | 24.9, CH <sub>2</sub>           | 1.90-1.05, m                          |
| 1 $\beta$   |                                 | 1.84, m                               |                                 |                                       |
| 2           | 22.1, CH <sub>2</sub>           | 1.54, m                               | 21.7, CH <sub>2</sub>           | 1.90-1.50, m                          |
| 3           | 76.5, CH                        | 3.34, s                               | 75.5, CH                        | 3.36, bs                              |
| 4           | 38.7, C                         | -                                     | 38.3, C                         | -                                     |
| 5           | 41.4, CH                        | 2.13, m                               | 40.6, CH                        | 2.20, m                               |
| 6 $\alpha$  |                                 | 1.97, m                               |                                 |                                       |
| 6 $\beta$   | 26.0, CH                        | 1.54, m                               | 25.9, CH                        | 1.90-1.50, m                          |
| 7           | 32.3, CH <sub>2</sub>           | 1.54, m                               | 31.9, CH <sub>2</sub>           | 1.90-1.50, m                          |
| 8           | 38.4, CH                        | 1.86, m                               | 37.7, CH                        | 1.90-1.50, m                          |
| 9           | 99.7, C                         | -                                     | 99.0, C                         | -                                     |
| 10          | 43.5, C                         | -                                     | 43.0, C                         | -                                     |
| 11 $\alpha$ |                                 | 3.24, d, 16.9                         |                                 | 3.18, d, 17.2                         |
| 11 $\beta$  | 33.0, CH                        | 2.86, d, 16.9                         | 32.6, CH                        | 2.83, d, 17.2                         |
| 12          | 16.0, CH <sub>3</sub>           | 0.74, d, 6.5                          | 16.0, CH <sub>3</sub>           | 0.73, d, 6.0                          |
| 13          | 29.0, CH <sub>3</sub>           | 0.99, s                               | 28.6, CH <sub>3</sub>           | 0.98, s                               |
| 14          | 23.0, CH <sub>3</sub>           | 0.89, s                               | 22.8, CH <sub>3</sub>           | 0.87, s                               |
| 15          | 16.5, CH <sub>3</sub>           | 1.06, s                               | 16.4, CH <sub>3</sub>           | 1.03, s                               |
| 1'          | 119.0, C                        | -                                     | 118.0, C                        | -                                     |
| 2'          | 155.2, C                        | -                                     | 153.9, C                        | -                                     |
| 3'          | 102.1, CH                       | 6.69, s                               | 102.3, CH                       | 6.80, s                               |
| 4'          | 116.7, C                        | -                                     | 116.0, C                        | -                                     |
| 5'          | 134.7, C                        | -                                     | 135.0, C                        | -                                     |
| 6'          | 157.8, C                        | -                                     | 154.7, C                        | -                                     |
| 7'          | 174.1, C                        | -                                     | 172.1, C                        | -                                     |
| 8'a         |                                 | 4.43, d, 17.4                         |                                 | 4.35, d, 16.5                         |
| 8'b         | 43.9, CH                        | 4.27, d, 17.4                         | 43.3, CH                        | 4.25, d, 16.5                         |



**Table S6.**  $^1\text{H}$  and  $^{13}\text{C}$  NMR data of **6** (500/125 MHz,  $\text{CD}_3\text{OD}$ ) and stachybotrylactam acetate (200/50 MHz,  $\text{CDCl}_3$ )<sup>36</sup>.

| <b>6</b>       |                                 |                                       | <b>Stachybotrylactam acetate</b> |                                       |
|----------------|---------------------------------|---------------------------------------|----------------------------------|---------------------------------------|
| N <sup>o</sup> | $\delta_{\text{C}}$ (ppm)/mult. | $\delta_{\text{H}}$ (ppm)/mult./J(Hz) | $\delta_{\text{C}}$ (ppm)/mult.  | $\delta_{\text{H}}$ (ppm)/mult./J(Hz) |
| 1 $\alpha$     | 25.9, CH <sub>2</sub>           | 1.15, m                               | 24.9, CH <sub>2</sub>            | 1.90-1.40, m                          |
| 1 $\beta$      |                                 | 1.71, m                               |                                  |                                       |
| 2              | 21.9, CH <sub>2</sub>           | 1.55, m                               | 20.8, CH <sub>2</sub>            | 1.90-1.40, m                          |
| 3              | 79.5, CH                        | 4.60, s                               | 77.9, CH                         | 4.58, s                               |
| 4              | 37.8, C                         | -                                     | 36.8, C                          | -                                     |
| 5              | 42.3, CH                        | 2.16, m                               | 40.9, CH                         | 2.00, m                               |
| 6 $\alpha$     | 23.4, CH <sub>2</sub>           | 1.87, m                               | 22.3, CH <sub>2</sub>            | 1.90-1.40, m                          |
| 6 $\beta$      |                                 | 1.55, m                               |                                  |                                       |
| 7              | 32.2, CH                        | 1.55, m                               | 30.8, CH                         | 1.90-1.40, m                          |
| 8              | 38.2, CH                        | 1.87, m                               | 37.0, CH                         | 1.90-1.40, m                          |
| 9              | 99.6, C                         | -                                     | 98.6, C                          | -                                     |
| 10             | 43.5, C                         | -                                     | 42.0, C                          | -                                     |
| 11 $\alpha$    | 32.9, CH                        | 3.23, d, 17.0                         | 31.8, CH                         | 3.19, d, 17.0                         |
| 11 $\beta$     |                                 | 2.88, d, 17.0                         |                                  | 2.84, d, 17.0                         |
| 12             | 15.9, CH <sub>3</sub>           | 0.76, d, 6.5                          | 15.5, CH <sub>3</sub>            | 0.70, d, 6.0                          |
| 13             | 28.4, CH <sub>3</sub>           | 0.97, s                               | 27.8, CH <sub>3</sub>            | 0.97, s                               |
| 14             | 22.3, CH <sub>3</sub>           | 0.92, s                               | 21.2, CH <sub>3</sub>            | 0.89, s                               |
| 15             | 16.4, CH <sub>3</sub>           | 1.08, s                               | 16.0, CH <sub>3</sub>            | 1.23, s                               |
| 16             | 172.4, C                        | -                                     | 170.4, C                         | -                                     |
| 17             | 21.1, CH <sub>3</sub>           | 2.03, s                               | 21.7, CH <sub>3</sub>            | 1.99, s                               |
| 1'             | 118.9, C                        | -                                     | 117.8, C                         | -                                     |
| 2'             | 155.4, C                        | -                                     | 153.3, C                         | -                                     |
| 3'             | 102.3, CH                       | 6.70, s                               | 102.3, CH                        | 6.90, s                               |
| 4'             | 116.2, C                        | -                                     | 115.3, C                         | -                                     |
| 5'             | 134.9, C                        | -                                     | 135.0, C                         | -                                     |
| 6'             | 157.6, C                        | -                                     | 156.4, C                         | -                                     |
| 7'             | 174.0, C                        | -                                     | 172.4, C                         | -                                     |
| 8'a            | 43.9, CH                        | 4.35, d, 17.2                         | 43.0, CH                         | 4.38, d, 15.0                         |
| 8'b            |                                 | 4.23, d, 17.2                         |                                  | 4.22, d, 15.0                         |

**Table S7.**  $^1\text{H}$  and  $^{13}\text{C}$  NMR data of **7** (500/125 MHz,  $\text{CD}_3\text{OD}$ ) and **2 $\alpha$ -acetoxystachybotrylactam acetate** (200/50 MHz,  $\text{CDCl}_3$ )<sup>36</sup>.

| <b>7</b>       |                                 |                                       | <b>2<math>\alpha</math>-acetoxystachybotrylactam acetate</b> |                                       |
|----------------|---------------------------------|---------------------------------------|--------------------------------------------------------------|---------------------------------------|
| N <sup>o</sup> | $\delta_{\text{C}}$ (ppm)/mult. | $\delta_{\text{H}}$ (ppm)/mult./J(Hz) | $\delta_{\text{C}}$ (ppm)/mult.                              | $\delta_{\text{H}}$ (ppm)/mult./J(Hz) |
| 1 $\alpha$     | 31.6, CH                        | 1.40, m                               | 30.5, CH                                                     | 1.80-1.40, m                          |
| 1 $\beta$      |                                 | 1.82, m                               |                                                              |                                       |
| 2              | 69.6, CH                        | 5.23, m                               | 68.2, CH                                                     | 5.21, bd, 11.0                        |
| 3              | 78.4, CH                        | 4.95, s                               | 76.7, CH                                                     | 4.95, bs                              |
| 4              | 39.1, C                         | -                                     | 38.1, C                                                      | -                                     |
| 5              | 41.9, CH                        | 2.13, m                               | 40.5, CH                                                     | 2.05, m                               |
| 6              | 21.5, CH <sub>2</sub>           | 1.66-1.54, m                          | 20.4, CH <sub>2</sub>                                        | 1.80-1.40, m                          |
| 7              | 32.1, CH                        | 1.66-1.54, m                          | 30.7, CH                                                     | 1.80-1.40, m                          |
| 8              | 37.8, CH                        | 1.91, m                               | 36.7, CH                                                     | 1.80-1.40, m                          |
| 9              | 99.2, C                         | -                                     | 98.1, C                                                      | -                                     |
| 10             | 44.8, C                         | -                                     | 43.5, C                                                      | -                                     |
| 11 $\alpha$    |                                 | 3.24, d, 17.1                         |                                                              | 3.24, d, 16.5                         |
| 11 $\beta$     | 33.0, CH                        | 2.93, d, 17.1                         | 32.0, CH                                                     | 2.90, d, 16.5                         |
| 12             | 15.8, CH <sub>3</sub>           | 0.78, d, 6.5                          | 15.4, CH <sub>3</sub>                                        | 0.71, d, 6.4                          |
| 13             | 28.3, CH <sub>3</sub>           | 1.05, s                               | 27.7, CH <sub>3</sub>                                        | 1.02, s                               |
| 14             | 22.0, CH <sub>3</sub>           | 0.94, s                               | 20.9, CH <sub>3</sub>                                        | 0.93, s                               |
| 15             | 17.3, CH <sub>3</sub>           | 1.16, s                               | 16.9, CH <sub>3</sub>                                        | 1.10, s                               |
| 16             | 172.3, C                        | -                                     | 170.3, C                                                     | -                                     |
| 17             | 20.9, CH <sub>3</sub>           | 2.07, s                               | 21.0, CH <sub>3</sub>                                        | 2.07, s                               |
| 18             | 172.4, C                        | -                                     | 170.3, C                                                     | -                                     |
| 19             | 20.8, CH <sub>3</sub>           | 1.86, s                               | 21.6, CH <sub>3</sub>                                        | 1.90, s                               |
| 1'             | 118.6, C                        | -                                     | 117.6, C                                                     | -                                     |
| 2'             | 155.5, C                        | -                                     | 153.4, C                                                     | -                                     |
| 3'             | 102.5, CH                       | 6.73, s                               | 102.5, CH                                                    | 7.01, s                               |
| 4'             | 116.9, C                        | -                                     | 115.3, C                                                     | -                                     |
| 5'             | 135.1, CH                       | -                                     | 133.0, CH                                                    | -                                     |
| 6'             | 157.4, C                        | -                                     | 156.1, C                                                     | -                                     |
| 7'             | 173.8, C                        | -                                     | 172.0, C                                                     | -                                     |
| 8'a            |                                 | 4.36, d, 17.2                         |                                                              | 4.42, d, 16.5                         |
| 8'b            | 43.8, CH                        | 4.24, d, 17.2                         | 43.5, CH                                                     | 4.25, d, 16.5                         |

**Table S8.** <sup>1</sup>H NMR data of **8** (500 MHz, CD<sub>3</sub>OD) and stachybotramide (50 MHz, C<sub>5</sub>D<sub>6</sub>N)<sup>36</sup>.

| <b>8</b>  |                                        | <b>Stachybotramide</b>                 |
|-----------|----------------------------------------|----------------------------------------|
| <b>N°</b> | <b>δ<sub>H</sub> (ppm)/mult./J(Hz)</b> | <b>δ<sub>H</sub> (ppm)/mult./J(Hz)</b> |
| 1α        | 1.10, m                                | 1.90-1.20, m                           |
| 1β        | 1.86, m                                | 1.90-1.20, m                           |
| 2         | 1.57, m                                | 1.90-1.20, m                           |
| 3         | 3.35, s                                | 3.60, bs                               |
| 4         | -                                      | -                                      |
| 5         | 2.14, m                                | 2.05, m                                |
| 6α        | 1.97, m                                | 1.90-1.20, m                           |
| 6β        | 1.57, m                                | 1.90-1.20, m                           |
| 7         | 1.57, m                                | 1.90-1.20, m                           |
| 8         | 1.86, m                                | 1.90-1.20, m                           |
| 9         | -                                      | -                                      |
| 10        | -                                      | -                                      |
| 11α       | 3.23, d, 16.9                          | 3.52, d, 17.0                          |
| 11β       | 2.85, d, 16.9                          | 3.10, d, 17.0                          |
| 12        | 0.73, d, 6.5                           | 0.84, d, 5.5                           |
| 13        | 0.98, s                                | 0.98, s                                |
| 14        | 0.89, s                                | 0.91, s                                |
| 15        | 1.06, s                                | 1.22, s                                |
| 1'        | -                                      | -                                      |
| 2'        | -                                      | -                                      |
| 3'        | 6.67, s                                | 7.35, s                                |
| 4'        | -                                      | -                                      |
| 5'        | -                                      | -                                      |
| 6'        | -                                      | -                                      |
| 7'        | -                                      | -                                      |
| 8'a       | 4.57, d, 17.2                          | 4.35, d, 16.8                          |
| 8'b       | 4.43, d, 17.2                          | 4.07, d, 16.8                          |
| 1''a      | 3.70, t, 5.4                           | 3.65, m                                |
| 1''b      |                                        |                                        |
| 2''       | 3.80, t, 5.4                           | 3.90, m                                |

**Table S9.**  $^1\text{H}$  and  $^{13}\text{C}$  NMR data of **9** (500/125 MHz,  $\text{CD}_3\text{OD}$ ) and chartarlactam B (500/125 MHz,  $(\text{CD}_3)_2\text{SO}$ )<sup>16</sup>.

| <b>9</b>             |                                                   |                                                         | <b>Chartarlactame B</b>                           |                                                         |
|----------------------|---------------------------------------------------|---------------------------------------------------------|---------------------------------------------------|---------------------------------------------------------|
| <b>N<sup>o</sup></b> | <b><math>\delta_{\text{C}}</math> (ppm)/mult.</b> | <b><math>\delta_{\text{H}}</math> (ppm)/mult./J(Hz)</b> | <b><math>\delta_{\text{C}}</math> (ppm)/mult.</b> | <b><math>\delta_{\text{H}}</math> (ppm)/mult./J(Hz)</b> |
| 1 $\alpha$           | 25.4, CH <sub>2</sub>                             | 1.08, m                                                 | 24.3, CH <sub>2</sub>                             | 0.91, m                                                 |
| 1 $\beta$            |                                                   | 1.84, m                                                 |                                                   | 1.75, m                                                 |
| 2                    | 22.1, CH <sub>2</sub>                             | 1.59, m                                                 | 25.3, CH <sub>2</sub>                             | 1.78, m                                                 |
| 3                    | 76.4, CH                                          | 3.33, s                                                 |                                                   | 1.38, m                                                 |
| 4                    | 38.5, C                                           | -                                                       | 73.9, CH                                          | 3.17, bs                                                |
| 5                    | 41.3, CH                                          | 2.13, m                                                 | 37.8, C                                           | -                                                       |
| 6 $\alpha$           | 26.0, CH <sub>2</sub>                             | 1.96, m                                                 | 39.8, CH                                          | 2.01, brd, 9.8                                          |
| 6 $\beta$            |                                                   | 1.51, m                                                 | 20.9, CH <sub>2</sub>                             | 1.49, m                                                 |
| 7                    | 32.3, CH <sub>2</sub>                             | 1.59, m                                                 | 31.2, CH <sub>2</sub>                             | 1.45, m                                                 |
|                      |                                                   |                                                         |                                                   | 1.52, m                                                 |
| 8                    | 38.4, CH                                          | 1.84, m                                                 | 36.9, CH                                          | 1.39, m                                                 |
| 9                    | 99.7, C                                           | -                                                       |                                                   | 1.78, m                                                 |
| 10                   | 43.5, C                                           | -                                                       | 98.3, C                                           | -                                                       |
| 11 $\alpha$          | 32.9, CH <sub>2</sub>                             | 3.22, d, 16.9                                           | 42.3, C                                           | -                                                       |
| 11 $\beta$           |                                                   | 2.85, d, 16.9                                           | 32.1, CH <sub>2</sub>                             | 3.11, d, 17.0                                           |
| 12                   | 16.0, CH <sub>3</sub>                             | 0.74, d, 6.5                                            | 16.0, CH <sub>3</sub>                             | 2.76, d, 17.0                                           |
| 13                   | 29.0, CH <sub>3</sub>                             | 0.98, s                                                 |                                                   | 0.64, d, 6.1                                            |
| 14                   | 23.0, CH <sub>3</sub>                             | 0.89, s                                                 | 29.1, CH <sub>3</sub>                             | 0.88, s                                                 |
| 15                   | 16.5, CH <sub>3</sub>                             | 1.05, s                                                 | 22.8, CH <sub>3</sub>                             | 0.80, s                                                 |
| 1'                   | 118.6, C                                          | -                                                       | 16.3, CH <sub>3</sub>                             | 0.95, s                                                 |
| 2'                   | 155.2, C                                          | -                                                       | 116.9, C                                          | -                                                       |
| 3'                   | 102.1, CH                                         | 6.65, s                                                 | 154.1, C                                          | -                                                       |
| 4'                   | 114.3, C                                          | -                                                       | 101.3, CH                                         | 6.55, s                                                 |
| 5'                   | 135.2, C                                          | -                                                       | 134.5, C                                          | -                                                       |
| 6'                   | 157.6, C                                          | -                                                       | 112.3, C                                          | -                                                       |
| 7'                   | 171.7, C                                          | -                                                       | 156.3, C                                          | -                                                       |
| 8'a                  | 43.6, CH <sub>2</sub>                             | 4.47, d, 17.2                                           | 167.9, C                                          | -                                                       |
| 8'b                  |                                                   | 4.33, d, 17.2                                           | 47.0, CH <sub>2</sub>                             | 4.32, d, 17.0                                           |
| 1''                  | 43.5, CH <sub>2</sub>                             | 3.61, t, 7.0                                            | 41.8, CH <sub>2</sub>                             | 4.21, d, 17.0                                           |
| 2''                  | 29.5, CH <sub>2</sub>                             | 1.73, m                                                 |                                                   | 3.46, t, 7.0                                            |
| 3''                  | 25.0, CH <sub>2</sub>                             | 1.67, m                                                 | 27.7, CH <sub>2</sub>                             | 1.60, m                                                 |
| 4''                  | 38.7, CH <sub>2</sub>                             | 2.23, t, 7.3                                            | 22.4, CH <sub>2</sub>                             | 1.46, m                                                 |
| 5''                  | 170.3, C                                          | -                                                       | 33.9, CH <sub>2</sub>                             | 2.24, t, 7.0                                            |
|                      |                                                   |                                                         | 175.3, C                                          | -                                                       |

**Table S10.** <sup>1</sup>H NMR data of **10** (500 MHz, CD<sub>3</sub>OD) and F1839-J (270 MHz, C<sub>5</sub>D<sub>6</sub>N)<sup>6</sup>.

| <b>10</b> |                                        | <b>F1839-J</b>                         |
|-----------|----------------------------------------|----------------------------------------|
| <b>N°</b> | <b>δ<sub>H</sub> (ppm)/mult./J(Hz)</b> | <b>δ<sub>H</sub> (ppm)/mult./J(Hz)</b> |
| 1α        | 1.10, m                                | 1.20, dt, 12.2, 3.3                    |
| 1β        | 1.88, m                                | 2.36, m                                |
| 2         | 1.54, m                                | 1.77-2.07, m                           |
| 3         | 3.35, m                                | 3.63, m                                |
| 4         | -                                      | -                                      |
| 5         | 2.11, m                                | 2.54, m                                |
| 6α        | 1.93, m                                | 1.71, m                                |
| 6β        | 1.54, m                                | 1.44, m                                |
| 7         | 1.60, m                                | 2.00, m                                |
| 8         | 1.83, m                                | 1.62, m                                |
| 9         | -                                      | 2.00, m                                |
| 10        | -                                      | -                                      |
| 11α       | 3.22, d, 16.9                          | -                                      |
| 11β       | 2.85, d, 16.9                          | 3.58, d, 17.1                          |
| 12        | 0.73, d, 6.5                           | 2.92, d, 17.1                          |
| 13        | 0.99, s                                | 0.92, d, 5.4                           |
| 14        | 0.89, s                                | 1.28, s                                |
| 15        | 1.06, s                                | 0.95, s                                |
| 1'        | -                                      | 1.04, s                                |
| 2'        | -                                      | -                                      |
| 3'        | 6.67, s                                | -                                      |
| 4'        | -                                      | 7.40, s                                |
| 5'        | -                                      | -                                      |
| 6'        | -                                      | -                                      |
| 7'        | -                                      | -                                      |
| 8'a       | 4.69, d, 16.9                          | -                                      |
| 8'b       | 4.24, d, 16.9                          | 3.84, d, 16.6                          |
| 1''a      | 3.87, m                                | 4.08, d, 16.6                          |
| 1''b      | 3.78, m                                | 3.34, m                                |
| 2''       | 1.83, m                                | 3.58, m                                |
| 3''       | 1.60, m                                | 1.45, m                                |
| 4''       | 2.33, m                                | 1.58, m                                |
| 5''       | -                                      | 2.35, m                                |
| 6''       | 3.65, m                                | -                                      |
|           |                                        | 3.61, s                                |

### 3. TD-DFT and ECD

**Table S11.** Coordinates (Ångstroms) for conformer (2''S, 3R, 5S, 8R, 9R, 10S)-**1**\_C1 (Energy: -1800.701682 Hartree, Solvent: CH<sub>3</sub>OH, Boltzmann %: 58.3).

| Symbol | X          | Y          | Z          |
|--------|------------|------------|------------|
| C      | 3.8968710  | 0.3158420  | 0.4409050  |
| C      | 3.7285060  | 1.4779510  | -0.6069280 |
| C      | 3.6382750  | 2.8426760  | 0.0961770  |
| C      | 2.4712350  | 2.8774880  | 1.0857950  |
| C      | 2.4882380  | 1.7266010  | 2.1051020  |
| C      | 2.6462350  | 0.3532410  | 1.4035350  |
| C      | 3.9311320  | -1.0371850 | -0.3151310 |
| C      | 4.9470630  | -1.0635700 | -1.4622500 |
| C      | 4.7006390  | 0.0502270  | -2.4801570 |
| C      | 4.7013110  | 1.4617910  | -1.8396640 |
| O      | 1.4300620  | 0.1620990  | 0.5673040  |
| C      | 0.6996310  | -0.8640950 | 1.0603200  |
| C      | 1.2916470  | -1.4988390 | 2.1511410  |
| C      | 2.6132590  | -0.8342380 | 2.4268770  |
| C      | -0.5231480 | -1.2908570 | 0.5664290  |
| C      | -1.1338250 | -2.3694500 | 1.2079230  |
| C      | -0.5789840 | -3.0286110 | 2.2993650  |
| C      | 0.6596300  | -2.5790090 | 2.7712350  |
| C      | -1.3794400 | -0.8079550 | -0.5679150 |
| N      | -2.5346950 | -1.7080240 | -0.4790840 |
| C      | -2.4189680 | -2.6475440 | 0.5185050  |
| O      | 3.4316600  | -0.1492270 | -3.1391220 |
| H      | 2.7448550  | 1.2980100  | -1.0519130 |
| C      | 1.2520550  | 1.8217500  | 3.0130240  |
| C      | 6.1603640  | 1.8533600  | -1.5139160 |
| C      | 5.1719510  | 0.4390030  | 1.3131810  |
| O      | -3.2377890 | -3.5308860 | 0.7643470  |
| O      | 1.2055170  | -3.2345290 | 3.8426260  |
| C      | 4.2026270  | 2.4733580  | -2.8989780 |
| C      | -3.6343560 | -1.7139460 | -1.4199340 |
| C      | -4.2699160 | -0.3223100 | -1.6284330 |
| C      | -3.2141110 | -2.3535260 | -2.7486770 |
| O      | -4.2620710 | -2.4716300 | -3.5846620 |
| O      | -2.1003440 | -2.7276030 | -3.0278530 |
| C      | -4.8706750 | 0.2513700  | -0.3416790 |
| C      | -5.4946760 | 1.6274860  | -0.5730530 |
| N      | -6.0617860 | 2.1400160  | 0.6773160  |
| C      | -6.7271660 | 3.3477130  | 0.7703890  |
| N      | -6.3368390 | 4.3118080  | -0.1449430 |
| N      | -7.6556000 | 3.4887530  | 1.6609610  |
| H      | 3.4925830  | 3.6355970  | -0.6409690 |
| H      | 4.5718440  | 3.0795200  | 0.6159070  |
| H      | 2.4687010  | 3.8276980  | 1.6302770  |
| H      | 1.5274830  | 2.8350830  | 0.5299200  |
| H      | 3.3750130  | 1.8405740  | 2.7397060  |

|   |            |            |            |
|---|------------|------------|------------|
| H | 2.9406390  | -1.2399240 | -0.7271110 |
| H | 4.1641220  | -1.8537440 | 0.3744500  |
| H | 4.8931230  | -2.0316430 | -1.9739380 |
| H | 5.9711940  | -0.9877590 | -1.0858760 |
| H | 5.4915480  | 0.0275880  | -3.2423520 |
| H | 3.4429790  | -1.5269350 | 2.2716990  |
| H | 2.6990320  | -0.4663310 | 3.4526570  |
| H | -1.0783190 | -3.8631210 | 2.7753760  |
| H | -0.8871390 | -0.9073250 | -1.5400260 |
| H | -1.6818630 | 0.2370250  | -0.4440260 |
| H | 3.4325870  | -1.0345110 | -3.5195520 |
| H | 1.2273900  | 2.8051420  | 3.4903980  |
| H | 1.2472820  | 1.0749450  | 3.8097230  |
| H | 0.3302690  | 1.7116890  | 2.4361120  |
| H | 6.6805620  | 1.1305010  | -0.8874370 |
| H | 6.1989140  | 2.8201840  | -1.0072460 |
| H | 6.7306220  | 1.9502820  | -2.4431050 |
| H | 6.0602530  | 0.1409880  | 0.7590730  |
| H | 5.3438230  | 1.4501960  | 1.6809640  |
| H | 5.1160860  | -0.2190160 | 2.1836030  |
| H | 2.0498970  | -2.8380020 | 4.0868120  |
| H | 4.7352070  | 2.3181310  | -3.8424260 |
| H | 3.1353600  | 2.3638820  | -3.0961970 |
| H | 4.3928610  | 3.5015560  | -2.5836570 |
| H | -4.3899760 | -2.3820230 | -0.9947470 |
| H | -3.5224140 | 0.3653700  | -2.0378590 |
| H | -5.0488890 | -0.4233860 | -2.3866570 |
| H | -3.9561140 | -2.8889020 | -4.4060820 |
| H | -4.1059680 | 0.3327180  | 0.4364550  |
| H | -5.6367190 | -0.4362540 | 0.0356120  |
| H | -6.2582940 | 1.5649760  | -1.3602610 |
| H | -4.7175810 | 2.3103260  | -0.9279530 |
| H | -6.5115540 | 1.4383740  | 1.2510190  |
| H | -6.6365590 | 5.2525340  | 0.0658980  |
| H | -5.3890920 | 4.2703980  | -0.4921920 |
| H | -7.9900040 | 4.4495820  | 1.6859300  |

**Table S12.** Coordinates (Ångstroms) for conformer (2''S, 3R, 5S, 8R, 9R, 10S)-1\_C2 (Energy: -1800.70038 Hartree, Solvent: CH<sub>3</sub>OH, Boltzmann %: 14.6).

| Symbol | X          | Y          | Z          |
|--------|------------|------------|------------|
| C      | 4.2545900  | -0.2591160 | -0.2593760 |
| C      | 3.9079500  | -1.7898800 | -0.3751620 |
| C      | 3.9954600  | -2.2644660 | -1.8353140 |
| C      | 3.0531060  | -1.4605280 | -2.7342970 |
| C      | 3.2465080  | 0.0611700  | -2.6310640 |
| C      | 3.2254990  | 0.5345740  | -1.1549640 |
| C      | 4.1012810  | 0.1767820  | 1.2204870  |
| C      | 4.8642590  | -0.7234420 | 2.1985870  |
| C      | 4.4468080  | -2.1897030 | 2.0827630  |
| C      | 4.6121790  | -2.7513050 | 0.6476420  |
| O      | 1.8608540  | 0.2440810  | -0.6363550 |
| C      | 1.2181200  | 1.4061250  | -0.3814190 |
| C      | 2.0016800  | 2.5384740  | -0.5984680 |
| C      | 3.3693640  | 2.0914990  | -1.0378900 |
| C      | -0.0911340 | 1.5216030  | 0.0582010  |
| C      | -0.5876600 | 2.8089380  | 0.2687570  |
| C      | 0.1592280  | 3.9633490  | 0.0620070  |
| C      | 1.4798150  | 3.8148990  | -0.3781680 |
| C      | -1.1479940 | 0.5003940  | 0.3636380  |
| N      | -2.2774620 | 1.3464240  | 0.7662620  |
| C      | -1.9955390 | 2.6933220  | 0.7269530  |
| O      | 3.0665900  | -2.3461140 | 2.4762730  |
| H      | 2.8506240  | -1.8480650 | -0.0982260 |
| C      | 2.2212440  | 0.7740290  | -3.5268060 |
| C      | 6.1165990  | -2.9845010 | 0.3818960  |
| C      | 5.6819280  | 0.0983720  | -0.7457260 |
| O      | -2.7775860 | 3.5950540  | 1.0159360  |
| O      | 2.2142630  | 4.9535870  | -0.5751820 |
| C      | 3.9364910  | -4.1422160 | 0.5915290  |
| C      | -3.5781740 | 0.8284530  | 1.1680870  |
| C      | -4.2739320 | 0.0281740  | 0.0592700  |
| C      | -3.4072430 | 0.0168330  | 2.4612380  |
| O      | -3.1455100 | 0.8161180  | 3.5104290  |
| O      | -3.4694630 | -1.1868670 | 2.5453250  |
| C      | -5.7581240 | -0.2256090 | 0.3468190  |
| C      | -6.4258800 | -1.0219000 | -0.7748630 |
| N      | -7.8399750 | -1.2325070 | -0.4720830 |
| C      | -8.7146550 | -1.9418820 | -1.2659770 |
| N      | -8.1349920 | -2.8677070 | -2.1187210 |
| N      | -9.9892060 | -1.7683870 | -1.1073220 |
| H      | 3.7240070  | -3.3203570 | -1.9034480 |
| H      | 5.0202840  | -2.1898240 | -2.2121520 |
| H      | 3.1845680  | -1.7600990 | -3.7794390 |
| H      | 2.0158330  | -1.6977090 | -2.4710030 |
| H      | 4.2456300  | 0.3085680  | -3.0088970 |
| H      | 3.0432150  | 0.1587740  | 1.4891990  |



|   |             |            |            |
|---|-------------|------------|------------|
| H | 4.4474850   | 1.2059370  | 1.3528820  |
| H | 4.6827410   | -0.3821130 | 3.2245170  |
| H | 5.9448930   | -0.6432760 | 2.0498010  |
| H | 5.0673710   | -2.7984730 | 2.7545380  |
| H | 4.1298360   | 2.3762900  | -0.3079720 |
| H | 3.6731890   | 2.5268940  | -1.9932160 |
| H | -0.2558430  | 4.9486030  | 0.2327650  |
| H | -0.8554080  | -0.1783170 | 1.1727700  |
| H | -1.4045240  | -0.1099710 | -0.5082980 |
| H | 2.9696420   | -1.9815940 | 3.3629480  |
| H | 2.3194350   | 0.4081780  | -4.5525020 |
| H | 2.3564770   | 1.8572410  | -3.5551090 |
| H | 1.1997020   | 0.5657290  | -3.1985910 |
| H | 6.7333670   | -2.1013310 | 0.5408230  |
| H | 6.2818520   | -3.3248340 | -0.6427010 |
| H | 6.4899250   | -3.7677710 | 1.0490380  |
| H | 6.4322320   | -0.1819110 | -0.0086460 |
| H | 5.9502570   | -0.3890140 | -1.6826440 |
| H | 5.7858130   | 1.1754360  | -0.8973260 |
| H | 3.0990870   | 4.7353970  | -0.8907060 |
| H | 4.2631810   | -4.7499920 | 1.4410290  |
| H | 2.8488080   | -4.0689640 | 0.6320140  |
| H | 4.2135570   | -4.6793880 | -0.3181450 |
| H | -4.1702650  | 1.7131300  | 1.4166490  |
| H | -4.1717990  | 0.6022620  | -0.8663790 |
| H | -3.7567780  | -0.9241730 | -0.0881080 |
| H | -3.0024300  | 0.2622460  | 4.2951410  |
| H | -6.2749200  | 0.7343360  | 0.4638330  |
| H | -5.8768740  | -0.7734990 | 1.2858880  |
| H | -5.9292740  | -1.9932350 | -0.8610480 |
| H | -6.2926330  | -0.4929350 | -1.7295480 |
| H | -8.3012470  | -0.4768130 | 0.0151100  |
| H | -7.1953830  | -2.6957240 | -2.4448720 |
| H | -8.7420600  | -3.2286220 | -2.8394910 |
| H | -10.5159280 | -2.3872990 | -1.7191220 |

**Table S13.** Coordinates (Ångstroms) for conformer (2''S, 3R, 5S, 8R, 9R, 10S)-**1**\_C3 (Energy: -1800.700959 Hartree, Solvent: CH<sub>3</sub>OH, Boltzmann %: 27.1).

| Symbol | X          | Y          | Z          |
|--------|------------|------------|------------|
| C      | -4.0309710 | -0.6435190 | 0.0704450  |
| C      | -4.1629530 | 0.2597880  | -1.2116470 |
| C      | -4.2446150 | -0.6004280 | -2.4838260 |
| C      | -3.0132550 | -1.4988930 | -2.6215090 |
| C      | -2.7363270 | -2.3642890 | -1.3815380 |
| C      | -2.7214240 | -1.5103110 | -0.0875940 |
| C      | -3.9021620 | 0.2721480  | 1.3148360  |
| C      | -5.0006010 | 1.3377430  | 1.3978140  |
| C      | -5.0440790 | 2.2235450  | 0.1525160  |
| C      | -5.2276340 | 1.4129590  | -1.1559700 |
| O      | -1.5738850 | -0.5709930 | -0.2123630 |
| C      | -0.6322350 | -0.8842280 | 0.7070040  |
| C      | -1.0020430 | -1.9288650 | 1.5525400  |
| C      | -2.3894410 | -2.3742450 | 1.1779110  |
| C      | 0.5975070  | -0.2596120 | 0.8442870  |
| C      | 1.4458260  | -0.7259000 | 1.8496210  |
| C      | 1.1161540  | -1.7650120 | 2.7129390  |
| C      | -0.1364900 | -2.3693560 | 2.5561430  |
| C      | 1.2483650  | 0.8669900  | 0.0956870  |
| N      | 2.5536480  | 0.9575500  | 0.7600430  |
| C      | 2.6940870  | 0.0765610  | 1.8069910  |
| O      | -3.8265430 | 2.9918630  | 0.0446110  |
| H      | -3.2081940 | 0.7922160  | -1.2643130 |
| C      | -1.4548260 | -3.1839470 | -1.5999890 |
| C      | -6.6959650 | 0.9381050  | -1.2381640 |
| C      | -5.2211650 | -1.6138560 | 0.2786620  |
| O      | 3.6747520  | -0.0034570 | 2.5437170  |
| O      | -0.4614150 | -3.3877250 | 3.4123980  |
| C      | -5.0085540 | 2.3695890  | -2.3521980 |
| C      | 3.5430210  | 1.9739360  | 0.4721690  |
| C      | 3.8505530  | 2.1132820  | -1.0372540 |
| C      | 3.1408500  | 3.3188650  | 1.0881070  |
| O      | 4.1182970  | 4.2324730  | 0.9429300  |
| O      | 2.0965870  | 3.5512340  | 1.6487000  |
| C      | 4.3938270  | 0.8354300  | -1.6896190 |
| C      | 5.7966710  | 0.4497610  | -1.2163330 |
| N      | 6.2701750  | -0.7171350 | -1.9533370 |
| C      | 7.4328110  | -1.3636240 | -1.5953680 |
| N      | 7.8559380  | -2.2963980 | -2.5422930 |
| N      | 8.0461870  | -1.0757180 | -0.4959180 |
| H      | -4.3081790 | 0.0399600  | -3.3665040 |
| H      | -5.1519740 | -1.2124400 | -2.4869730 |
| H      | -3.1231360 | -2.1565460 | -3.4903010 |
| H      | -2.1328160 | -0.8747350 | -2.8132260 |
| H      | -3.5658190 | -3.0712360 | -1.2619880 |
| H      | -2.9342290 | 0.7764120  | 1.2871840  |

|   |            |            |            |
|---|------------|------------|------------|
| H | -3.9262310 | -0.3242580 | 2.2315190  |
| H | -4.8298590 | 1.9687160  | 2.2780010  |
| H | -5.9831760 | 0.8822120  | 1.5501420  |
| H | -5.8867230 | 2.9238270  | 0.2339470  |
| H | -3.0945260 | -2.1922950 | 1.9916030  |
| H | -2.4461710 | -3.4410650 | 0.9462600  |
| H | 1.7966150  | -2.1022560 | 3.4846650  |
| H | 0.6994570  | 1.8087170  | 0.1937500  |
| H | 1.3609630  | 0.6477760  | -0.9708980 |
| H | -3.7086270 | 3.4761250  | 0.8692790  |
| H | -1.5556770 | -3.7783140 | -2.5122000 |
| H | -1.2448240 | -3.8776520 | -0.7832310 |
| H | -0.5869950 | -2.5314220 | -1.7255450 |
| H | -7.0252100 | 0.3734280  | -0.3672420 |
| H | -6.8525720 | 0.3112410  | -2.1187760 |
| H | -7.3573220 | 1.8049030  | -1.3342040 |
| H | -6.0937950 | -1.0917590 | 0.6669690  |
| H | -5.5270940 | -2.1195670 | -0.6367320 |
| H | -4.9730210 | -2.3863570 | 1.0104500  |
| H | -1.3438740 | -3.7245290 | 3.2177680  |
| H | -5.5902590 | 3.2854120  | -2.2086400 |
| H | -3.9606570 | 2.6529090  | -2.4605090 |
| H | -5.3428170 | 1.9153360  | -3.2874790 |
| H | 4.4507720  | 1.6701530  | 1.0010150  |
| H | 2.9419930  | 2.4270310  | -1.5595070 |
| H | 4.5709670  | 2.9250580  | -1.1582510 |
| H | 3.8271080  | 5.0637200  | 1.3512350  |
| H | 4.4166170  | 1.0027190  | -2.7723650 |
| H | 3.7118460  | -0.0028930 | -1.5176610 |
| H | 5.7998370  | 0.1931790  | -0.1561460 |
| H | 6.4814430  | 1.3002150  | -1.3412210 |
| H | 6.0763330  | -0.7040760 | -2.9454010 |
| H | 8.5489020  | -2.9520520 | -2.2100330 |
| H | 7.1241830  | -2.7538240 | -3.0708380 |
| H | 8.8331630  | -1.7049510 | -0.3530030 |

**Table S14.** Coordinates (Ångstroms) for conformer (2''S, 3R, 5S, 8R, 9R, 10S)-**1**\_C4 (Energy: -1800.691933 Hartree, Solvent: CH<sub>3</sub>OH, Boltzmann %: 1.91.10<sup>-2</sup>).

| Symbol | X           | Y          | Z          |
|--------|-------------|------------|------------|
| C      | 4.2630870   | -0.2515130 | -0.2505340 |
| C      | 3.9159220   | -1.7800330 | -0.3910560 |
| C      | 4.0118980   | -2.2330900 | -1.8575240 |
| C      | 3.0763720   | -1.4146540 | -2.7505880 |
| C      | 3.2701730   | 0.1051830  | -2.6233930 |
| C      | 3.2402230   | 0.5562660  | -1.1406020 |
| C      | 4.1011100   | 0.1628750  | 1.2346050  |
| C      | 4.8560690   | -0.7529720 | 2.2044280  |
| C      | 4.4377740   | -2.2167650 | 2.0638350  |
| C      | 4.6130860   | -2.7569820 | 0.6217660  |
| O      | 1.8718270   | 0.2582620  | -0.6351680 |
| C      | 1.2299770   | 1.4160160  | -0.3612680 |
| C      | 2.0151060   | 2.5513730  | -0.5548670 |
| C      | 3.3836960   | 2.1111610  | -0.9982160 |
| C      | -0.0802800  | 1.5253550  | 0.0768630  |
| C      | -0.5756700  | 2.8085070  | 0.3113440  |
| C      | 0.1727890   | 3.9658850  | 0.1281730  |
| C      | 1.4942580   | 3.8241540  | -0.3114900 |
| C      | -1.1362180  | 0.4983580  | 0.3647630  |
| N      | -2.2671140  | 1.3362290  | 0.7844290  |
| C      | -1.9830200  | 2.6866950  | 0.7664090  |
| O      | 3.0544860   | -2.3774610 | 2.4445900  |
| H      | 2.8569700   | -1.8415180 | -0.1211000 |
| C      | 2.2508660   | 0.8322520  | -3.5144690 |
| C      | 6.1192010   | -2.9868460 | 0.3628650  |
| C      | 5.6937020   | 0.1116990  | -0.7228650 |
| O      | -2.7651840  | 3.5829680  | 1.0668160  |
| O      | 2.2305740   | 4.9650840  | -0.4845940 |
| C      | 3.9375280   | -4.1466650 | 0.5401170  |
| C      | -3.5756780  | 0.8295780  | 1.1762070  |
| C      | -4.2876040  | 0.0615770  | 0.0498250  |
| C      | -3.4343670  | 0.0766840  | 2.5185200  |
| O      | -3.2401690  | -1.2586210 | 2.4835200  |
| O      | -3.4524060  | 0.6427420  | 3.5823870  |
| C      | -5.7585020  | -0.2394950 | 0.3644030  |
| C      | -6.4515880  | -0.9603120 | -0.7929010 |
| N      | -7.8487370  | -1.2223370 | -0.4581360 |
| C      | -8.7349050  | -1.9000970 | -1.2681560 |
| N      | -8.1645760  | -2.7489090 | -2.2034730 |
| N      | -10.0057090 | -1.7729100 | -1.0506550 |
| H      | 3.7394300   | -3.2874610 | -1.9429970 |
| H      | 5.0391810   | -2.1544780 | -2.2267480 |
| H      | 3.2145910   | -1.6986490 | -3.7991960 |
| H      | 2.0371070   | -1.6547020 | -2.4979400 |
| H      | 4.2717890   | 0.3575370  | -2.9911680 |
| H      | 3.0413930   | 0.1432010  | 1.4965510  |

|   |             |            |            |
|---|-------------|------------|------------|
| H | 4.4484500   | 1.1892590  | 1.3842500  |
| H | 4.6677110   | -0.4267460 | 3.2340130  |
| H | 5.9378120   | -0.6720500 | 2.0644780  |
| H | 5.0526890   | -2.8362010 | 2.7310420  |
| H | 4.1424920   | 2.3839240  | -0.2620220 |
| H | 3.6894900   | 2.5624100  | -1.9455280 |
| H | -0.2413330  | 4.9480110  | 0.3179520  |
| H | -0.8377880  | -0.1923680 | 1.1613030  |
| H | -1.3913590  | -0.0951350 | -0.5195050 |
| H | 2.9500440   | -2.0217530 | 3.3340210  |
| H | 2.3547320   | 0.4816480  | -4.5449060 |
| H | 2.3872880   | 1.9156250  | -3.5259210 |
| H | 1.2272290   | 0.6201440  | -3.1953060 |
| H | 6.7351990   | -2.1064080 | 0.5388690  |
| H | 6.2913110   | -3.3122360 | -0.6654540 |
| H | 6.4877100   | -3.7799500 | 1.0209970  |
| H | 6.4391200   | -0.1795050 | 0.0149550  |
| H | 5.9675140   | -0.3626980 | -1.6648420 |
| H | 5.7993370   | 1.1906990  | -0.8586570 |
| H | 3.1175440   | 4.7516230  | -0.7973800 |
| H | 4.2575370   | -4.7669290 | 1.3831000  |
| H | 2.8495730   | -4.0737350 | 0.5733110  |
| H | 4.2214660   | -4.6705480 | -0.3751770 |
| H | -4.1585730  | 1.7197780  | 1.4190070  |
| H | -4.2231800  | 0.6862410  | -0.8457070 |
| H | -3.7577860  | -0.8662710 | -0.2011310 |
| H | -3.2719780  | -1.6097160 | 1.5825500  |
| H | -6.2799720  | 0.7022680  | 0.5687300  |
| H | -5.8495070  | -0.8546010 | 1.2655450  |
| H | -5.9420690  | -1.9119270 | -0.9719180 |
| H | -6.3602460  | -0.3553510 | -1.7063160 |
| H | -8.3098670  | -0.5108510 | 0.0917900  |
| H | -8.7921610  | -3.0828340 | -2.9197520 |
| H | -7.2478950  | -2.5219680 | -2.5600090 |
| H | -10.5410870 | -2.3592590 | -1.6865160 |

**Table S15.** Coordinates (Ångstroms) for conformer (2''R, 10R, 10'R, 13R, 13'R, 14S, 14'S, 15S, 15'S, 18R, 18'R)-2\_C1  
(Energy: -2885.29118 Hartree, Solvent: CH<sub>3</sub>OH, Boltzmann %: 44.8).

| Symbol | X          | Y          | Z          |
|--------|------------|------------|------------|
| C      | 5.0835480  | -3.0947280 | 0.9635610  |
| C      | 4.1784870  | -3.5986850 | -0.2214480 |
| C      | 5.0301690  | -4.2420340 | -1.3287400 |
| C      | 6.0703960  | -3.2567750 | -1.8669680 |
| C      | 6.9554330  | -2.6331060 | -0.7757310 |
| C      | 6.1009610  | -2.0413790 | 0.3744610  |
| C      | 4.1826770  | -2.4119080 | 2.0245560  |
| C      | 2.9928060  | -3.2766490 | 2.4556380  |
| C      | 2.1168690  | -3.6875650 | 1.2717700  |
| C      | 2.9082850  | -4.4354390 | 0.1685780  |
| O      | 5.3056420  | -0.9309820 | -0.2163460 |
| C      | 5.7166700  | 0.2468760  | 0.3067950  |
| C      | 6.7030170  | 0.1115890  | 1.2824480  |
| C      | 6.9883090  | -1.3538280 | 1.4688580  |
| C      | 5.2378330  | 1.4971190  | -0.0519540 |
| C      | 5.7810660  | 2.6044070  | 0.6011460  |
| C      | 6.7670540  | 2.5134380  | 1.5775440  |
| C      | 7.2295180  | 1.2373630  | 1.9194620  |
| C      | 4.2030990  | 1.9365330  | -1.0465970 |
| N      | 4.2103450  | 3.3925300  | -0.8676230 |
| C      | 5.1302520  | 3.8237690  | 0.0584420  |
| O      | 1.5026350  | -2.5224600 | 0.6800450  |
| C      | 3.2077600  | -5.8682350 | 0.6641920  |
| H      | 3.7620770  | -2.6819040 | -0.6505040 |
| C      | 7.9256050  | -1.6249930 | -1.4115510 |
| C      | 1.9916090  | -4.5826700 | -1.0692770 |
| C      | 5.9044990  | -4.2177480 | 1.6463610  |
| O      | 5.3471000  | 4.9967920  | 0.3565490  |
| O      | 8.1971590  | 1.1507450  | 2.8850010  |
| N      | -2.2956200 | 3.3691790  | 1.0212390  |
| C      | -2.8254100 | 2.0109110  | 0.8892370  |
| C      | -4.3078420 | 2.2425690  | 0.9433370  |
| C      | -4.5703500 | 3.6054090  | 1.0933650  |
| C      | -3.2674950 | 4.3238380  | 1.1415590  |
| C      | -5.3954680 | 1.3864560  | 0.8756030  |
| C      | -6.6984350 | 1.8761690  | 0.9553760  |
| C      | -6.9319610 | 3.2444750  | 1.1056370  |
| C      | -5.8533200 | 4.1341210  | 1.1783180  |
| O      | -5.3296670 | 0.0427620  | 0.7273570  |
| C      | -6.7026580 | -0.5289740 | 0.7596910  |
| C      | -7.6503350 | 0.7186870  | 0.8206520  |
| C      | -6.7924690 | -1.3886280 | 2.0466520  |
| C      | -5.8219800 | -2.5797940 | 1.9932780  |
| C      | -5.9324120 | -3.4095620 | 0.7118190  |
| C      | -5.7944150 | -2.5223230 | -0.5368130 |
| C      | -6.8901310 | -1.3932000 | -0.5481070 |

|   |            |            |            |
|---|------------|------------|------------|
| C | -5.5996560 | -3.3291450 | -1.8701190 |
| C | -5.4545930 | -2.3423490 | -3.0566970 |
| C | -6.5710030 | -1.2985910 | -3.1010330 |
| C | -6.6721700 | -0.5004040 | -1.7966350 |
| O | -4.1694930 | -1.6924440 | -2.9542110 |
| H | -4.8507450 | -1.9796980 | -0.4227080 |
| C | -6.7388890 | -4.3218360 | -2.1947700 |
| C | -4.3020740 | -4.1667520 | -1.7760480 |
| C | -6.5629220 | -0.5934100 | 3.3414500  |
| C | -8.3434330 | -1.9312330 | -0.5584280 |
| O | -8.1947920 | 3.7703400  | 1.1849810  |
| O | -3.0781800 | 5.5349500  | 1.2681080  |
| C | 3.4206170  | 4.3126500  | -1.6586760 |
| C | 1.9171050  | 3.9596410  | -1.6923290 |
| C | 1.2679070  | 3.9767410  | -0.3046410 |
| C | -0.2297400 | 3.6566560  | -0.3597100 |
| C | -0.8698760 | 3.6598550  | 1.0355460  |
| C | 4.0034650  | 4.4603070  | -3.0684280 |
| O | 4.9359620  | 3.8351650  | -3.5143160 |
| O | 3.3498320  | 5.4057660  | -3.7689030 |
| H | 4.3917910  | -4.5599170 | -2.1561900 |
| H | 5.5290390  | -5.1460270 | -0.9656660 |
| H | 6.7151000  | -3.7539980 | -2.5994120 |
| H | 5.5574420  | -2.4490320 | -2.4016300 |
| H | 7.5557970  | -3.4299210 | -0.3210650 |
| H | 3.7974990  | -1.4758690 | 1.6154250  |
| H | 4.7669110  | -2.1563550 | 2.9133350  |
| H | 2.3804180  | -2.7205890 | 3.1752890  |
| H | 3.3262120  | -4.1733140 | 2.9858540  |
| H | 1.3191210  | -4.3558350 | 1.6238530  |
| H | 6.7201590  | -1.6818030 | 2.4751890  |
| H | 8.0429820  | -1.6041000 | 1.3285280  |
| H | 7.1704630  | 3.3928750  | 2.0635660  |
| H | 3.2149250  | 1.5169320  | -0.8316640 |
| H | 4.4684620  | 1.6732050  | -2.0749810 |
| H | 1.0194780  | -2.0597210 | 1.3734440  |
| H | 2.2697600  | -6.4203460 | 0.7796580  |
| H | 3.8165080  | -6.4109160 | -0.0623350 |
| H | 3.7254770  | -5.9033890 | 1.6214810  |
| H | 7.3841790  | -0.7998590 | -1.8812530 |
| H | 8.6360270  | -1.2041720 | -0.6969680 |
| H | 8.5075290  | -2.1241020 | -2.1911820 |
| H | 2.4091230  | -5.2915590 | -1.7875790 |
| H | 1.8343300  | -3.6295040 | -1.5761010 |
| H | 1.0126410  | -4.9657560 | -0.7649900 |
| H | 6.6970170  | -3.7986470 | 2.2709900  |
| H | 6.3751560  | -4.8967110 | 0.9359530  |
| H | 5.2800080  | -4.8195060 | 2.3041120  |
| H | 8.4549350  | 0.2318500  | 3.0239240  |
| H | -2.5059780 | 1.5518390  | -0.0527440 |

|   |            |            |            |
|---|------------|------------|------------|
| H | -2.4648330 | 1.3768840  | 1.7077930  |
| H | -6.0247990 | 5.1968510  | 1.2955980  |
| H | -8.2580890 | 0.8111910  | -0.0817710 |
| H | -8.3463000 | 0.6384070  | 1.6597180  |
| H | -7.8168490 | -1.7785950 | 2.0738000  |
| H | -5.9981760 | -3.2147850 | 2.8680210  |
| H | -4.7987530 | -2.1981590 | 2.0871890  |
| H | -5.1476270 | -4.1693840 | 0.7209850  |
| H | -6.8817510 | -3.9540890 | 0.7039150  |
| H | -5.4695310 | -2.9301510 | -3.9847170 |
| H | -6.3830440 | -0.6116600 | -3.9345910 |
| H | -7.5175670 | -1.7932790 | -3.3367750 |
| H | -5.7498340 | 0.0698300  | -1.6692460 |
| H | -7.4855960 | 0.2243660  | -1.8944220 |
| H | -4.0930700 | -1.0730360 | -3.6883250 |
| H | -7.6855960 | -3.8411290 | -2.4365190 |
| H | -6.9151160 | -4.9991870 | -1.3562830 |
| H | -6.4559100 | -4.9362760 | -3.0552060 |
| H | -4.0371210 | -4.5566720 | -2.7637240 |
| H | -3.4602960 | -3.5750100 | -1.4137710 |
| H | -4.4331280 | -5.0243020 | -1.1124990 |
| H | -6.6699440 | -1.2606440 | 4.2010730  |
| H | -7.2753880 | 0.2232770  | 3.4748830  |
| H | -5.5538050 | -0.1746020 | 3.3722090  |
| H | -8.6253550 | -2.2899450 | -1.5467050 |
| H | -8.5014660 | -2.7516660 | 0.1410680  |
| H | -9.0549310 | -1.1428170 | -0.3016390 |
| H | -8.8551820 | 3.0689750  | 1.1416660  |
| H | 3.5364760  | 5.2919910  | -1.1838110 |
| H | 1.4211080  | 4.6870270  | -2.3383930 |
| H | 1.7787160  | 2.9800590  | -2.1624510 |
| H | 1.7703210  | 3.2580920  | 0.3518850  |
| H | 1.4144780  | 4.9645950  | 0.1481440  |
| H | -0.3778270 | 2.6775780  | -0.8285990 |
| H | -0.7454860 | 4.3911910  | -0.9874970 |
| H | -0.3751590 | 2.9250250  | 1.6792930  |
| H | -0.7503310 | 4.6408550  | 1.4997410  |
| H | 3.7543710  | 5.4722080  | -4.6488630 |



**Table S16.** Coordinates (Ångstroms) for conformer (2''R, 10R, 10'R, 13R, 13'R, 14S, 14'S, 15S, 15'S, 18R, 18'R)-2\_C2  
(Energy: -2885.28789 Hartree, Solvent: CH<sub>3</sub>OH, Boltzmann %: 1.4).

| Symbol | X          | Y          | Z          |
|--------|------------|------------|------------|
| C      | 5.0698560  | 3.0748670  | -0.9665490 |
| C      | 4.1874890  | 3.5845050  | 0.2329480  |
| C      | 5.0612680  | 4.2244590  | 1.3247820  |
| C      | 6.1058810  | 3.2345220  | 1.8460590  |
| C      | 6.9686220  | 2.6041370  | 0.7406720  |
| C      | 6.0911770  | 2.0161850  | -0.3936950 |
| C      | 4.1479720  | 2.3964720  | -2.0120320 |
| C      | 2.9563690  | 3.2679250  | -2.4244780 |
| C      | 2.1020350  | 3.6837050  | -1.2266750 |
| C      | 2.9151140  | 4.4275260  | -0.1365580 |
| O      | 5.2998450  | 0.9113300  | 0.2131020  |
| C      | 5.6852990  | -0.2685910 | -0.3241040 |
| C      | 6.6526330  | -0.1405380 | -1.3196350 |
| C      | 6.9538770  | 1.3218990  | -1.5036650 |
| C      | 5.1986370  | -1.5146980 | 0.0381100  |
| C      | 5.7106430  | -2.6249600 | -0.6349860 |
| C      | 6.6758780  | -2.5409830 | -1.6323310 |
| C      | 7.1498170  | -1.2691160 | -1.9747690 |
| C      | 4.1812350  | -1.9474130 | 1.0537380  |
| N      | 4.1640100  | -3.4012490 | 0.8652040  |
| C      | 5.0537530  | -3.8387270 | -0.0871490 |
| O      | 1.4916730  | 2.5217830  | -0.6249920 |
| C      | 3.2137980  | 5.8587800  | -0.6370590 |
| H      | 3.7736350  | 2.6703630  | 0.6700190  |
| C      | 7.9426940  | 1.5902500  | 1.3611320  |
| C      | 2.0194640  | 4.5792720  | 1.1161090  |
| C      | 5.8855470  | 4.1931640  | -1.6633540 |
| O      | 5.2446380  | -5.0123280 | -0.3991220 |
| O      | 8.0982680  | -1.1893560 | -2.9594940 |
| N      | -2.3490660 | -3.4306480 | -0.9812550 |
| C      | -2.8543550 | -2.0607600 | -0.8757080 |
| C      | -4.3409950 | -2.2680750 | -0.9073530 |
| C      | -4.6281820 | -3.6293790 | -1.0215530 |
| C      | -3.3382580 | -4.3710140 | -1.0677180 |
| C      | -5.4131620 | -1.3922160 | -0.8457060 |
| C      | -6.7249690 | -1.8615100 | -0.8968590 |
| C      | -6.9833070 | -3.2288090 | -1.0105500 |
| C      | -5.9208110 | -4.1381580 | -1.0767000 |
| O      | -5.3231410 | -0.0468050 | -0.7294530 |
| C      | -6.6868890 | 0.5471410  | -0.7538730 |
| C      | -7.6559440 | -0.6854790 | -0.7778520 |
| C      | -6.7802440 | 1.3835400  | -2.0557460 |
| C      | -5.7892630 | 2.5587130  | -2.0387250 |
| C      | -5.8668910 | 3.4141970  | -0.7717680 |
| C      | -5.7264180 | 2.5481870  | 0.4914180  |
| C      | -6.8414890 | 1.4390740  | 0.5395150  |

|   |            |            |            |
|---|------------|------------|------------|
| C | -5.4983990 | 3.3759190  | 1.8064570  |
| C | -5.3520790 | 2.4079320  | 3.0082380  |
| C | -6.4866240 | 1.3863110  | 3.0892500  |
| C | -6.6225720 | 0.5659730  | 1.8017820  |
| O | -4.0810230 | 1.7324510  | 2.8965680  |
| H | -4.7939720 | 1.9870910  | 0.3744640  |
| C | -6.6159730 | 4.3934650  | 2.1294840  |
| C | -4.1887110 | 4.1897910  | 1.6784150  |
| C | -6.5816650 | 0.5597570  | -3.3378020 |
| C | -8.2848330 | 2.0031600  | 0.5592840  |
| O | -8.2559040 | -3.7344480 | -1.0594010 |
| O | -3.1713190 | -5.5879260 | -1.1672460 |
| C | 3.3838580  | -4.3122730 | 1.6785310  |
| C | 1.8809810  | -3.9789200 | 1.7099170  |
| C | 1.2220860  | -4.0341490 | 0.3286300  |
| C | -0.2738890 | -3.7069790 | 0.3867780  |
| C | -0.9282900 | -3.7451700 | -1.0011500 |
| C | 3.9406030  | -4.4813620 | 3.0994600  |
| O | 3.3239460  | -4.9899760 | 4.0067930  |
| O | 5.2053400  | -4.0459660 | 3.2276000  |
| H | 4.4387880  | 4.5461000  | 2.1628260  |
| H | 5.5582320  | 5.1257260  | 0.9525080  |
| H | 6.7659080  | 3.7295020  | 2.5662610  |
| H | 5.5981860  | 2.4303330  | 2.3910110  |
| H | 7.5661890  | 3.3965970  | 0.2749320  |
| H | 3.7636620  | 1.4632140  | -1.5957850 |
| H | 4.7160570  | 2.1365370  | -2.9099260 |
| H | 2.3292810  | 2.7151310  | -3.1339150 |
| H | 3.2862800  | 4.1625240  | -2.9603180 |
| H | 1.3021390  | 4.3560890  | -1.5657780 |
| H | 6.6754540  | 1.6580600  | -2.5044680 |
| H | 8.0138510  | 1.5572370  | -1.3778080 |
| H | 7.0553210  | -3.4224500 | -2.1337040 |
| H | 3.1938570  | -1.5128300 | 0.8676890  |
| H | 4.4758320  | -1.6914330 | 2.0772690  |
| H | 0.9951080  | 2.0614380  | -1.3104570 |
| H | 2.2767110  | 6.4150030  | -0.7394050 |
| H | 3.8351950  | 6.3990480  | 0.0805000  |
| H | 3.7180870  | 5.8912940  | -1.6015870 |
| H | 7.4034830  | 0.7687000  | 1.8396210  |
| H | 8.6387600  | 1.1647460  | 0.6352520  |
| H | 8.5403630  | 2.0857500  | 2.1310750  |
| H | 2.4531690  | 5.2845440  | 1.8283910  |
| H | 1.8641030  | 3.6265270  | 1.6242890  |
| H | 1.0382330  | 4.9690610  | 0.8280630  |
| H | 6.6661340  | 3.7698470  | -2.3000270 |
| H | 6.3706600  | 4.8704620  | -0.9611440 |
| H | 5.2537100  | 4.7973100  | -2.3118190 |
| H | 8.3676570  | -0.2734470 | -3.0961480 |
| H | -2.5165600 | -1.5851530 | 0.0515320  |

|   |            |            |            |
|---|------------|------------|------------|
| H | -2.4924960 | -1.4523690 | -1.7129670 |
| H | -6.1114090 | -5.2003900 | -1.1655240 |
| H | -8.2562760 | -0.7482710 | 0.1320420  |
| H | -8.3587930 | -0.6118770 | -1.6117830 |
| H | -7.7982470 | 1.7902360  | -2.0766970 |
| H | -5.9674320 | 3.1801740  | -2.9227360 |
| H | -4.7740870 | 2.1579870  | -2.1399860 |
| H | -5.0692480 | 4.1597730  | -0.8063720 |
| H | -6.8064560 | 3.9753650  | -0.7609630 |
| H | -5.3409410 | 3.0122990  | 3.9256200  |
| H | -6.2984700 | 0.7115150  | 3.9326620  |
| H | -7.4201440 | 1.9029030  | 3.3300150  |
| H | -5.7136220 | -0.0248860 | 1.6723890  |
| H | -7.4486790 | -0.1403960 | 1.9249310  |
| H | -4.0038580 | 1.1246670  | 3.6402360  |
| H | -7.5672680 | 3.9335110  | 2.3926040  |
| H | -6.7923640 | 5.0591460  | 1.2817130  |
| H | -6.3104470 | 5.0177340  | 2.9750140  |
| H | -3.9027400 | 4.5926110  | 2.6550060  |
| H | -3.3622610 | 3.5778440  | 1.3145440  |
| H | -4.3154520 | 5.0376030  | 1.0016360  |
| H | -6.6890920 | 1.2120350  | -4.2087780 |
| H | -7.3093380 | -0.2472030 | -3.4460490 |
| H | -5.5801690 | 0.1234130  | -3.3735390 |
| H | -8.5484500 | 2.3797200  | 1.5459910  |
| H | -8.4366240 | 2.8170890  | -0.1491220 |
| H | -9.0133810 | 1.2244090  | 0.3214890  |
| H | -8.9034020 | -3.0211140 | -1.0165080 |
| H | 3.5144280  | -5.2973650 | 1.2148330  |
| H | 1.4020840  | -4.6961160 | 2.3796410  |
| H | 1.7329000  | -2.9905690 | 2.1585620  |
| H | 1.7209030  | -3.3345900 | -0.3512750 |
| H | 1.3624380  | -5.0342620 | -0.0988260 |
| H | -0.4127700 | -2.7144810 | 0.8295790  |
| H | -0.7872210 | -4.4206790 | 1.0401250  |
| H | -0.4288330 | -3.0394500 | -1.6732990 |
| H | -0.8296090 | -4.7422950 | -1.4348590 |
| H | 5.4958640  | -4.2227260 | 4.1371150  |

**Table S17.** Coordinates (Ångstroms) for conformer (2''R, 10R, 10'R, 13R, 13'R, 14S, 14'S, 15S, 15'S, 18R, 18'R)-2\_C3  
(Energy: -2885.29129 Hartree, Solvent: CH<sub>3</sub>OH, Boltzmann %: 50.2).

| Symbol | X          | Y          | Z          |
|--------|------------|------------|------------|
| C      | 7.2709380  | -2.4711360 | -0.4232750 |
| C      | 6.8039380  | -2.3794050 | -1.9232420 |
| C      | 7.9435710  | -1.8744390 | -2.8237580 |
| C      | 8.4424270  | -0.5025550 | -2.3636330 |
| C      | 8.8421390  | -0.4540100 | -0.8798760 |
| C      | 7.7226850  | -1.0269640 | 0.0265670  |
| C      | 6.0738080  | -2.9351740 | 0.4455240  |
| C      | 5.3918370  | -4.2000230 | -0.0879540 |
| C      | 4.9071770  | -4.0338260 | -1.5285420 |
| C      | 6.0420980  | -3.6245790 | -2.5018990 |
| O      | 6.5501060  | -0.1227470 | -0.1248180 |
| C      | 6.3187820  | 0.5162910  | 1.0443130  |
| C      | 7.1743550  | 0.1273560  | 2.0737770  |
| C      | 8.0975230  | -0.9373470 | 1.5464060  |
| C      | 5.3369550  | 1.4707810  | 1.2583880  |
| C      | 5.2439220  | 2.0219660  | 2.5371470  |
| C      | 6.0790720  | 1.6645820  | 3.5899770  |
| C      | 7.0592510  | 0.6958590  | 3.3442260  |
| C      | 4.2937090  | 2.0655580  | 0.3582360  |
| N      | 3.6152410  | 3.0035290  | 1.2611020  |
| C      | 4.1346890  | 3.0095070  | 2.5364130  |
| O      | 3.8697200  | -3.0316950 | -1.5925100 |
| C      | 6.9327350  | -4.8597180 | -2.7655080 |
| H      | 6.0449840  | -1.5909140 | -1.9207700 |
| C      | 9.2726640  | 0.9735430  | -0.5076790 |
| C      | 5.4028300  | -3.2477960 | -3.8597490 |
| C      | 8.4633110  | -3.4345670 | -0.1964010 |
| O      | 3.7340170  | 3.7020650  | 3.4683510  |
| O      | 7.8758580  | 0.3420060  | 4.3850120  |
| N      | -3.5585210 | 3.1413190  | -1.0331170 |
| C      | -4.3871830 | 2.2826800  | -0.1851180 |
| C      | -5.3935790 | 1.7485070  | -1.1629150 |
| C      | -5.1403540 | 2.2648810  | -2.4350090 |
| C      | -3.9553720 | 3.1610390  | -2.3416020 |
| C      | -6.4680610 | 0.8838920  | -1.0270050 |
| C      | -7.2586190 | 0.5467670  | -2.1247130 |
| C      | -6.9804560 | 1.0750890  | -3.3866380 |
| C      | -5.9042290 | 1.9546850  | -3.5545640 |
| O      | -6.8587890 | 0.2900210  | 0.1248240  |
| C      | -8.0881090 | -0.5112130 | -0.1212390 |
| C      | -8.3161560 | -0.4216780 | -1.6698510 |
| C      | -9.2293960 | 0.1759550  | 0.6718240  |
| C      | -8.9691420 | 0.1249640  | 2.1861140  |
| C      | -8.6368290 | -1.2747680 | 2.7085250  |
| C      | -7.4717850 | -1.8980140 | 1.9215510  |
| C      | -7.8096950 | -1.9796480 | 0.3867940  |

|   |            |            |            |
|---|------------|------------|------------|
| C | -6.8804440 | -3.1936120 | 2.5834170  |
| C | -5.7069380 | -3.7256840 | 1.7216690  |
| C | -6.0755940 | -3.8770820 | 0.2457080  |
| C | -6.5860500 | -2.5663380 | -0.3628460 |
| O | -4.5899110 | -2.8221840 | 1.8650810  |
| H | -6.6477580 | -1.1798360 | 1.9771700  |
| C | -7.9003990 | -4.3373730 | 2.7837740  |
| C | -6.3312140 | -2.8455720 | 3.9875230  |
| C | -9.4972200 | 1.6271910  | 0.2428480  |
| C | -9.0582070 | -2.8395580 | 0.0652680  |
| O | -7.7270330 | 0.7654950  | -4.4932320 |
| O | -3.4233730 | 3.8054360  | -3.2473640 |
| C | 2.4876070  | 3.8418050  | 0.8680280  |
| C | 1.2996080  | 3.0358050  | 0.3289110  |
| C | 0.0266280  | 3.8756020  | 0.1678100  |
| C | -1.1510890 | 3.0505450  | -0.3620750 |
| C | -2.4232950 | 3.8945970  | -0.5212960 |
| C | 2.9988940  | 4.8771850  | -0.1440020 |
| O | 2.9688780  | 4.7486760  | -1.3456480 |
| O | 3.5371550  | 5.9466960  | 0.4683940  |
| H | 7.5967790  | -1.7897370 | -3.8561120 |
| H | 8.7757560  | -2.5850750 | -2.8404900 |
| H | 9.3014750  | -0.1927930 | -2.9681180 |
| H | 7.6563230  | 0.2415780  | -2.5360150 |
| H | 9.7082160  | -1.1103480 | -0.7340230 |
| H | 5.3320410  | -2.1352080 | 0.4857720  |
| H | 6.3984710  | -3.1224000 | 1.4732030  |
| H | 4.5348780  | -4.4478560 | 0.5494440  |
| H | 6.0595760  | -5.0643040 | -0.0299060 |
| H | 4.4885120  | -4.9856490 | -1.8831670 |
| H | 7.9369440  | -1.8865090 | 2.0618740  |
| H | 9.1539820  | -0.6867710 | 1.6727040  |
| H | 5.9827290  | 2.1126050  | 4.5709100  |
| H | 3.5950510  | 1.3150680  | -0.0247360 |
| H | 4.7264560  | 2.5887810  | -0.5012400 |
| H | 3.1759130  | -3.2854330 | -0.9739380 |
| H | 6.3541920  | -5.6230720 | -3.2951640 |
| H | 7.7819010  | -4.5975350 | -3.4004240 |
| H | 7.3259500  | -5.3202150 | -1.8604990 |
| H | 8.4460650  | 1.6781640  | -0.6295880 |
| H | 9.6437960  | 1.0564550  | 0.5159680  |
| H | 10.0800040 | 1.2936780  | -1.1719470 |
| H | 6.1585670  | -3.1728750 | -4.6446430 |
| H | 4.8635070  | -2.3009440 | -3.8078700 |
| H | 4.6920030  | -4.0219940 | -4.1649060 |
| H | 8.9182150  | -3.2709460 | 0.7834450  |
| H | 9.2501480  | -3.3254620 | -0.9421840 |
| H | 8.1409040  | -4.4740290 | -0.2159550 |
| H | 8.5181450  | -0.3192390 | 4.1016230  |
| H | -3.7897780 | 1.4894750  | 0.2777480  |

|   |             |            |            |
|---|-------------|------------|------------|
| H | -4.8465220  | 2.8668420  | 0.6208980  |
| H | -5.6820580  | 2.3712100  | -4.5290990 |
| H | -8.1971970  | -1.3922030 | -2.1558400 |
| H | -9.3303100  | -0.0813870 | -1.8942520 |
| H | -10.1337810 | -0.4055830 | 0.4570800  |
| H | -9.8476660  | 0.5211980  | 2.7062800  |
| H | -8.1387570  | 0.8016530  | 2.4184410  |
| H | -8.3762210  | -1.1980600 | 3.7665990  |
| H | -9.5273320  | -1.9092220 | 2.6607830  |
| H | -5.4117970  | -4.7040600 | 2.1249980  |
| H | -5.1925950  | -4.2165770 | -0.3085120 |
| H | -6.8139720  | -4.6767960 | 0.1389020  |
| H | -5.7735190  | -1.8373880 | -0.3430120 |
| H | -6.8316560  | -2.7433050 | -1.4139830 |
| H | -3.8723860  | -3.1506750 | 1.3121900  |
| H | -8.2553810  | -4.7787690 | 1.8537710  |
| H | -8.7731830  | -3.9863030 | 3.3386850  |
| H | -7.4421550  | -5.1389470 | 3.3715480  |
| H | -5.7237700  | -3.6733480 | 4.3664270  |
| H | -5.7053570  | -1.9522040 | 3.9703250  |
| H | -7.1430490  | -2.6851940 | 4.7003070  |
| H | -10.3288790 | 2.0305840  | 0.8270060  |
| H | -9.7670890  | 1.7198620  | -0.8111970 |
| H | -8.6255730  | 2.2597740  | 0.4290220  |
| H | -8.8318520  | -3.9026010 | 0.1253980  |
| H | -9.8949510  | -2.6480570 | 0.7363850  |
| H | -9.4088060  | -2.6559330 | -0.9531380 |
| H | -8.4384840  | 0.1574500  | -4.2603900 |
| H | 2.1985270   | 4.3760530  | 1.7750060  |
| H | 1.5664070   | 2.5836710  | -0.6305240 |
| H | 1.1141960   | 2.2190770  | 1.0333990  |
| H | -0.2416760  | 4.3164210  | 1.1355010  |
| H | 0.2156330   | 4.7111850  | -0.5156470 |
| H | -1.3476080  | 2.2148760  | 0.3186120  |
| H | -0.8921790  | 2.6158710  | -1.3334580 |
| H | -2.7086720  | 4.3350040  | 0.4395520  |
| H | -2.2423190  | 4.7136390  | -1.2204320 |
| H | 3.8955430   | 6.5441900  | -0.2085280 |

**Table S18.** Coordinates (Ångstroms) for conformer (2''R, 10R, 10'R, 13R, 13'R, 14S, 14'S, 15S, 15'S, 18R, 18'R)-2\_C4  
(Energy: -2885.28879 Hartree, Solvent: CH<sub>3</sub>OH, Boltzmann %: 3.6).

| Symbol | X          | Y          | Z          |
|--------|------------|------------|------------|
| C      | 8.7274890  | 1.6344310  | -0.5874560 |
| C      | 8.8893730  | 1.7613880  | 0.9728830  |
| C      | 10.0239640 | 0.8569850  | 1.4826670  |
| C      | 9.7679890  | -0.6069930 | 1.1165780  |
| C      | 9.5042960  | -0.8350020 | -0.3808640 |
| C      | 8.4088740  | 0.1234450  | -0.9142040 |
| C      | 7.5429300  | 2.5258630  | -1.0409250 |
| C      | 7.6383800  | 3.9665640  | -0.5270500 |
| C      | 7.7326340  | 4.0322050  | 0.9974820  |
| C      | 8.9235830  | 3.2165670  | 1.5624020  |
| O      | 7.1510510  | -0.2340610 | -0.2035770 |
| C      | 6.2634860  | -0.7458100 | -1.0863010 |
| C      | 6.7199910  | -0.7452300 | -2.4034880 |
| C      | 8.0937330  | -0.1319950 | -2.4287090 |
| C      | 5.0058140  | -1.2346390 | -0.7696420 |
| C      | 4.2226700  | -1.7208940 | -1.8173590 |
| C      | 4.6402810  | -1.7395850 | -3.1435830 |
| C      | 5.9149800  | -1.2385200 | -3.4327040 |
| C      | 4.2682090  | -1.3564670 | 0.5317580  |
| N      | 2.9992620  | -1.9591270 | 0.1043810  |
| C      | 2.9319460  | -2.1894020 | -1.2520030 |
| O      | 6.5158560  | 3.5331980  | 1.5932280  |
| C      | 10.2288630 | 3.9946990  | 1.2810020  |
| H      | 7.9616330  | 1.3416000  | 1.3741330  |
| C      | 9.2043710  | -2.3212470 | -0.6315520 |
| C      | 8.7766590  | 3.1483710  | 3.1011890  |
| C      | 9.9948040  | 2.0360410  | -1.3836520 |
| O      | 1.9769510  | -2.6821980 | -1.8467640 |
| O      | 6.3203330  | -1.2550850 | -4.7406590 |
| N      | -3.5923350 | -1.9222960 | 1.9160930  |
| C      | -4.3173540 | -0.8236510 | 1.2757920  |
| C      | -5.4922700 | -1.5324290 | 0.6664290  |
| C      | -5.4193640 | -2.8984950 | 0.9443980  |
| C      | -4.1915520 | -3.1404350 | 1.7504780  |
| C      | -6.5717240 | -1.0896930 | -0.0811840 |
| C      | -7.5450640 | -1.9808420 | -0.5313350 |
| C      | -7.4484550 | -3.3422240 | -0.2364430 |
| C      | -6.3664480 | -3.8201400 | 0.5127760  |
| O      | -6.8040620 | 0.1942230  | -0.4411940 |
| C      | -8.0244050 | 0.2596080  | -1.2891070 |
| C      | -8.5933170 | -1.2014770 | -1.2782230 |
| C      | -7.5567220 | 0.6878210  | -2.7038990 |
| C      | -6.9565540 | 2.1031330  | -2.6909190 |
| C      | -7.8511600 | 3.1463870  | -2.0172730 |
| C      | -8.2526640 | 2.7000700  | -0.6014660 |
| C      | -9.0008640 | 1.3160890  | -0.6389690 |

|   |             |            |            |
|---|-------------|------------|------------|
| C | -8.9137470  | 3.8358750  | 0.2587420  |
| C | -9.2584300  | 3.2845650  | 1.6658760  |
| C | -10.0557370 | 1.9811100  | 1.6136830  |
| C | -9.3344400  | 0.8905900  | 0.8139600  |
| O | -8.0257060  | 3.0856870  | 2.3908300  |
| H | -7.3183500  | 2.4864040  | -0.0729090 |
| C | -10.1924240 | 4.4480280  | -0.3562470 |
| C | -7.9084020  | 4.9997060  | 0.4283540  |
| C | -6.5622500  | -0.2887900 | -3.3511150 |
| C | -10.3067760 | 1.3325780  | -1.4730560 |
| O | -8.3826810  | -4.2541270 | -0.6531220 |
| O | -3.7805590  | -4.2134120 | 2.1958290  |
| C | 1.9057150   | -2.2942590 | 1.0110210  |
| C | 1.4235360   | -1.0907040 | 1.8331070  |
| C | 0.1427440   | -1.3483300 | 2.6424610  |
| C | -1.1182420  | -1.5614810 | 1.7952560  |
| C | -2.3672230  | -1.7197070 | 2.6741410  |
| C | 2.3709940   | -3.4544170 | 1.9026430  |
| O | 2.9384140   | -3.3298080 | 2.9631050  |
| O | 2.1145040   | -4.6488220 | 1.3410140  |
| H | 10.1060190  | 0.9342060  | 2.5692050  |
| H | 10.9912290  | 1.1758440  | 1.0819180  |
| H | 10.6197570  | -1.2247400 | 1.4202320  |
| H | 8.9021620   | -0.9721540 | 1.6809350  |
| H | 10.4161930  | -0.5823780 | -0.9346690 |
| H | 6.6101720   | 2.0915530  | -0.6758770 |
| H | 7.4794790   | 2.5494830  | -2.1327030 |
| H | 6.7557380   | 4.5290070  | -0.8536550 |
| H | 8.4955610   | 4.4867560  | -0.9639090 |
| H | 7.8646330   | 5.0774330  | 1.3090130  |
| H | 8.1006680   | 0.7941270  | -3.0069470 |
| H | 8.8447790   | -0.7870920 | -2.8773040 |
| H | 4.0095740   | -2.1260500 | -3.9341820 |
| H | 4.1007960   | -0.3860580 | 1.0093500  |
| H | 4.7862490   | -1.9986810 | 1.2519190  |
| H | 5.7803980   | 4.0366800  | 1.2272080  |
| H | 10.2235480  | 4.9351110  | 1.8409660  |
| H | 11.0996950  | 3.4246040  | 1.6120480  |
| H | 10.3753640  | 4.2428570  | 0.2308500  |
| H | 8.2999980   | -2.6345050 | -0.1037120 |
| H | 9.0824500   | -2.5616100 | -1.6897480 |
| H | 10.0330050  | -2.9271090 | -0.2549370 |
| H | 9.6945660   | 2.7869350  | 3.5698100  |
| H | 7.9548440   | 2.4976030  | 3.4031560  |
| H | 8.5776130   | 4.1472560  | 3.5016170  |
| H | 9.9315820   | 1.6927670  | -2.4190390 |
| H | 10.9129650  | 1.6284530  | -0.9616950 |
| H | 10.1098640  | 3.1176810  | -1.4247140 |
| H | 7.2134090   | -0.9006970 | -4.8232570 |
| H | -4.6120020  | -0.0735070 | 2.0189550  |



|   |             |            |            |
|---|-------------|------------|------------|
| H | -3.6946240  | -0.3228910 | 0.5262580  |
| H | -6.2813470  | -4.8746580 | 0.7437320  |
| H | -9.5600080  | -1.2570790 | -0.7737460 |
| H | -8.7499540  | -1.5651070 | -2.2969610 |
| H | -8.4600060  | 0.7016340  | -3.3252610 |
| H | -6.7416830  | 2.4021860  | -3.7223220 |
| H | -5.9926170  | 2.0666460  | -2.1703870 |
| H | -7.3080430  | 4.0931430  | -1.9724490 |
| H | -8.7344340  | 3.3323640  | -2.6362800 |
| H | -9.8465810  | 4.0497730  | 2.1908090  |
| H | -10.2284630 | 1.6280700  | 2.6372680  |
| H | -11.0487070 | 2.1825840  | 1.2017690  |
| H | -8.4072640  | 0.6392060  | 1.3327170  |
| H | -9.9556880  | -0.0097120 | 0.8147940  |
| H | -8.2477270  | 2.7307940  | 3.2586580  |
| H | -11.0371790 | 3.7617130  | -0.3886530 |
| H | -10.0059860 | 4.7934400  | -1.3754960 |
| H | -10.5016280 | 5.3185300  | 0.2308090  |
| H | -8.2642900  | 5.6908630  | 1.1986980  |
| H | -6.9214460  | 4.6446150  | 0.7282570  |
| H | -7.8046160  | 5.5699940  | -0.4972760 |
| H | -6.3047570  | 0.0662650  | -4.3527280 |
| H | -6.9621780  | -1.2991860 | -3.4586630 |
| H | -5.6361610  | -0.3477990 | -2.7736220 |
| H | -11.1154350 | 1.8211010  | -0.9324760 |
| H | -10.1989190 | 1.8461810  | -2.4279920 |
| H | -10.6477760 | 0.3167320  | -1.6864090 |
| H | -9.0774650  | -3.8191620 | -1.1611530 |
| H | 1.1097570   | -2.6665940 | 0.3659420  |
| H | 2.2189680   | -0.7835100 | 2.5166360  |
| H | 1.2586210   | -0.2634340 | 1.1356050  |
| H | 0.2894320   | -2.2062810 | 3.3089180  |
| H | -0.0137220  | -0.4846850 | 3.2978240  |
| H | -1.0233330  | -2.4534490 | 1.1681470  |
| H | -1.2502530  | -0.7095860 | 1.1189640  |
| H | -2.2535670  | -2.5839160 | 3.3318070  |
| H | -2.4967120  | -0.8354020 | 3.3068870  |
| H | 2.4745620   | -5.3455380 | 1.9144020  |

**Table S19.** Coordinates (Ångstroms) for conformer (2''S, 3R, 5S, 8R, 9R, 10S)-3\_C1 (Energy: -1748.9471 Hartree, Solvent: CH<sub>3</sub>OH, Boltzmann %: 73.9).

| Symbol | X          | Y          | Z          |
|--------|------------|------------|------------|
| C      | 3.7146910  | -0.5053060 | -0.1554090 |
| C      | 3.8393740  | 0.4955010  | 1.0526090  |
| C      | 3.9998270  | -0.2632060 | 2.3806480  |
| C      | 2.8192520  | -1.2069140 | 2.6223380  |
| C      | 2.5509560  | -2.1744520 | 1.4581390  |
| C      | 2.4555750  | -1.4202980 | 0.1069710  |
| C      | 3.5034070  | 0.3086100  | -1.4575910 |
| C      | 4.5453500  | 1.4150250  | -1.6554200 |
| C      | 4.5847660  | 2.3912630  | -0.4793370 |
| C      | 4.8452520  | 1.6889940  | 0.8779430  |
| O      | 1.2655220  | -0.5316570 | 0.2007550  |
| C      | 0.3171980  | -0.9541920 | -0.6666060 |
| C      | 0.7163090  | -2.0377720 | -1.4474240 |
| C      | 2.1327840  | -2.3894660 | -1.0823440 |
| C      | -0.9450400 | -0.4001020 | -0.8112210 |
| C      | -1.7928210 | -0.9730480 | -1.7601500 |
| C      | -1.4343560 | -2.0539930 | -2.5582230 |
| C      | -0.1515110 | -2.5886550 | -2.3929150 |
| C      | -1.6332640 | 0.7407500  | -0.1199470 |
| N      | -2.9530660 | 0.7311260  | -0.7614030 |
| C      | -3.0772650 | -0.2292760 | -1.7388560 |
| O      | 3.3362090  | 3.1100830  | -0.3874390 |
| H      | 2.8616030  | 0.9854390  | 1.0974840  |
| C      | 1.3194150  | -3.0367340 | 1.7765900  |
| C      | 6.3364620  | 1.2890100  | 0.9457440  |
| C      | 4.9452420  | -1.4306730 | -0.3321640 |
| O      | 0.2000790  | -3.6499440 | -3.1841600 |
| C      | 4.6165960  | 2.7206190  | 2.0083880  |
| C      | -3.9962320 | 1.6970160  | -0.4998710 |
| C      | -4.3983660 | 1.7905470  | 0.9963070  |
| C      | -3.6376670 | 3.0689180  | -1.0833740 |
| O      | -2.6137040 | 3.3384340  | -1.6638820 |
| O      | -4.6317120 | 3.9554830  | -0.8928760 |
| O      | -4.0704490 | -0.4080110 | -2.4404770 |
| H      | 4.0560700  | 0.4431190  | 3.2120510  |
| H      | 4.9364590  | -0.8290910 | 2.3995120  |
| H      | 2.9864170  | -1.7922080 | 3.5327600  |
| H      | 1.9144280  | -0.6130880 | 2.7961480  |
| H      | 3.4113480  | -2.8474560 | 1.3635390  |
| H      | 3.5285200  | -0.3523460 | -2.3288030 |
| H      | 2.5131060  | 0.7676360  | -1.4336430 |
| H      | 4.3161990  | 1.9712900  | -2.5719880 |
| H      | 5.5436630  | 0.9956180  | -1.8091670 |
| H      | 5.3907440  | 3.1205600  | -0.6392390 |
| H      | 2.8070260  | -2.2353180 | -1.9273010 |
| H      | 2.2471820  | -3.4324620 | -0.7761770 |

|   |            |            |            |
|---|------------|------------|------------|
| H | -2.1159790 | -2.4759050 | -3.2859830 |
| H | -1.7165750 | 0.5802320  | 0.9592500  |
| H | -1.1316230 | 1.6987540  | -0.2854870 |
| H | 3.1726340  | 3.5275220  | -1.2403350 |
| H | 0.4233880  | -2.4197910 | 1.8818180  |
| H | 1.1220320  | -3.7985710 | 1.0195760  |
| H | 1.4760190  | -3.5561770 | 2.7259210  |
| H | 6.9578290  | 2.1899360  | 0.9586700  |
| H | 6.5486640  | 0.7350890  | 1.8628370  |
| H | 6.6668960  | 0.6787600  | 0.1066270  |
| H | 4.7145250  | -2.2655920 | -0.9980470 |
| H | 5.3023430  | -1.8530830 | 0.6066490  |
| H | 5.7791890  | -0.8976020 | -0.7851180 |
| H | 1.0968090  | -3.9411480 | -2.9814130 |
| H | 5.0016640  | 2.3530070  | 2.9620230  |
| H | 3.5600470  | 2.9623610  | 2.1323310  |
| H | 5.1481040  | 3.6493950  | 1.7788920  |
| H | -4.8649990 | 1.3552210  | -1.0705930 |
| H | -4.3719480 | 4.8009480  | -1.2932720 |
| H | -5.1546660 | 2.5731650  | 1.0805080  |
| H | -3.5402150 | 2.1186250  | 1.5880780  |
| C | -4.9431780 | 0.4898640  | 1.5489300  |
| C | -6.1756350 | -0.0103250 | 1.1079940  |
| C | -4.2411740 | -0.2316920 | 2.5194430  |
| C | -6.6866060 | -1.2023370 | 1.6168950  |
| H | -6.7456840 | 0.5388280  | 0.3651550  |
| C | -4.7497310 | -1.4260010 | 3.0332080  |
| H | -3.2921330 | 0.1450640  | 2.8865800  |
| C | -5.9732040 | -1.9165210 | 2.5813060  |
| H | -7.6432390 | -1.5716520 | 1.2643650  |
| H | -4.1897430 | -1.9692900 | 3.7862210  |
| H | -6.3706230 | -2.8437050 | 2.9784330  |

**Table S20.** Coordinates (Ångstroms) for conformer (2''S, 3R, 5S, 8R, 9R, 10S)-3\_C2 (Energy: -1748.9460 Hartree, Solvent: CH<sub>3</sub>OH, Boltzmann %: 24.3).

| Symbol | X          | Y          | Z          |
|--------|------------|------------|------------|
| C      | -4.0483540 | -0.0097130 | -0.0270610 |
| C      | -3.8763860 | -1.4601650 | 0.5586650  |
| C      | -4.2154640 | -1.4911240 | 2.0583660  |
| C      | -3.3333230 | -0.5176430 | 2.8437360  |
| C      | -3.3562070 | 0.9191090  | 2.2971560  |
| C      | -3.0802250 | 0.9472260  | 0.7720260  |
| C      | -3.6452030 | -0.0243500 | -1.5239850 |
| C      | -4.3459990 | -1.1241140 | -2.3292750 |
| C      | -4.0968570 | -2.5162720 | -1.7488390 |
| C      | -4.5211220 | -2.6331580 | -0.2625570 |
| O      | -1.6929880 | 0.4418100  | 0.5832520  |
| C      | -0.9078750 | 1.4401880  | 0.1191270  |
| C      | -1.5952590 | 2.6301680  | -0.1150950 |
| C      | -3.0479830 | 2.4103400  | 0.2091720  |
| C      | 0.4536000  | 1.3458900  | -0.1235020 |
| C      | 1.1005670  | 2.4847690  | -0.6049650 |
| C      | 0.4531910  | 3.6908820  | -0.8496210 |
| C      | -0.9224110 | 3.7542920  | -0.5991950 |
| C      | 1.4317540  | 0.2185990  | 0.0355630  |
| N      | 2.6850030  | 0.8417870  | -0.4097620 |
| C      | 2.5369550  | 2.1590070  | -0.7890310 |
| O      | -2.6970620 | -2.8548570 | -1.8494350 |
| H      | -2.8017980 | -1.6537000 | 0.4843860  |
| C      | -2.3999740 | 1.7989110  | 3.1176570  |
| C      | -6.0636430 | -2.6955330 | -0.1946160 |
| C      | -5.4867720 | 0.5520970  | 0.1030000  |
| O      | -1.5576510 | 4.9416200  | -0.8476250 |
| C      | -4.0030090 | -3.9852800 | 0.2827210  |
| C      | 3.9749660  | 0.1649510  | -0.4420860 |
| C      | 4.3904530  | -0.3986060 | 0.9336110  |
| C      | 3.9199800  | -0.9330580 | -1.5119540 |
| O      | 3.4016120  | -2.0147580 | -1.3599620 |
| O      | 4.4831690  | -0.5396230 | -2.6666280 |
| O      | 3.4363880  | 2.8916400  | -1.1916360 |
| H      | -4.0629400 | -2.4967160 | 2.4568020  |
| H      | -5.2704840 | -1.2544510 | 2.2281190  |
| H      | -3.6398810 | -0.4974670 | 3.8949120  |
| H      | -2.2984090 | -0.8783230 | 2.8284760  |
| H      | -4.3684630 | 1.3208740  | 2.4240390  |
| H      | -3.8671680 | 0.9410710  | -1.9880020 |
| H      | -2.5666020 | -0.1749520 | -1.6007430 |
| H      | -3.9875090 | -1.1012810 | -3.3651650 |
| H      | -5.4235070 | -0.9458410 | -2.3878560 |
| H      | -4.6721570 | -3.2568960 | -2.3211570 |
| H      | -3.6704570 | 2.5166980  | -0.6815610 |
| H      | -3.4326010 | 3.1193550  | 0.9467410  |

|   |            |            |            |
|---|------------|------------|------------|
| H | 0.9846900  | 4.5571360  | -1.2228110 |
| H | 1.5099450  | -0.1217360 | 1.0731370  |
| H | 1.1835330  | -0.6492300 | -0.5832880 |
| H | -2.4353490 | -2.7562400 | -2.7714900 |
| H | -1.3686040 | 1.4483170  | 3.0282380  |
| H | -2.4293020 | 2.8511390  | 2.8271160  |
| H | -2.6758440 | 1.7468770  | 4.1744120  |
| H | -6.4154040 | -3.6144570 | -0.6740090 |
| H | -6.4059070 | -2.7189530 | 0.8423430  |
| H | -6.5598370 | -1.8613230 | -0.6881480 |
| H | -5.5021470 | 1.6319490  | -0.0629300 |
| H | -5.9322730 | 0.3673120  | 1.0801010  |
| H | -6.1499340 | 0.1171560  | -0.6427020 |
| H | -2.4948900 | 4.8760830  | -0.6303800 |
| H | -4.4576740 | -4.2229810 | 1.2468780  |
| H | -2.9185850 | -3.9878120 | 0.4014300  |
| H | -4.2660390 | -4.7915420 | -0.4091060 |
| H | 4.6908290  | 0.9203550  | -0.7653350 |
| H | 4.3853570  | -1.2534750 | -3.3186860 |
| H | 4.2676740  | 0.4105930  | 1.6586380  |
| H | 3.7100940  | -1.2037920 | 1.2175880  |
| C | 5.8195210  | -0.9007730 | 0.9547200  |
| C | 6.1050230  | -2.2696500 | 0.9003050  |
| C | 6.8886890  | 0.0028890  | 1.0207740  |
| C | 7.4239350  | -2.7259220 | 0.9086650  |
| H | 5.2898090  | -2.9837120 | 0.8545500  |
| C | 8.2069200  | -0.4490910 | 1.0287640  |
| H | 6.6885030  | 1.0684420  | 1.0747850  |
| C | 8.4789650  | -1.8169150 | 0.9713580  |
| H | 7.6250130  | -3.7907480 | 0.8690360  |
| H | 9.0208140  | 0.2652400  | 1.0846950  |
| H | 9.5040210  | -2.1698690 | 0.9799280  |

**Table S21.** Coordinates (Ångstroms) for conformer (2''S, 3R, 5S, 8R, 9R, 10S)-3\_C3 (Energy: -1748.9433 Hartree, Solvent: CH<sub>3</sub>OH, Boltzmann %: 1.3).

| Symbol | X          | Y          | Z          |
|--------|------------|------------|------------|
| C      | -3.5084600 | 0.2840160  | -0.0695220 |
| C      | -3.3849610 | -1.2708990 | 0.1395920  |
| C      | -3.6627560 | -1.6525110 | 1.6031260  |
| C      | -2.7004380 | -0.9346690 | 2.5524020  |
| C      | -2.6735840 | 0.5916200  | 2.3703360  |
| C      | -2.4607040 | 0.9797000  | 0.8845800  |
| C      | -3.1699530 | 0.6173560  | -1.5451310 |
| C      | -3.9609330 | -0.2244120 | -2.5524530 |
| C      | -3.7568500 | -1.7246000 | -2.3399580 |
| C      | -4.1211490 | -2.1837490 | -0.9049670 |
| O      | -1.1101940 | 0.4830660  | 0.5063480  |
| C      | -0.2969570 | 1.5340480  | 0.2525820  |
| C      | -0.9337150 | 2.7699760  | 0.3489980  |
| C      | -2.3796080 | 2.5336710  | 0.6913160  |
| C      | 1.0460250  | 1.4492140  | -0.0810220 |
| C      | 1.7268090  | 2.6455710  | -0.3081210 |
| C      | 1.1300390  | 3.8992420  | -0.2207450 |
| C      | -0.2280410 | 3.9519300  | 0.1119180  |
| C      | 1.9706010  | 0.2806020  | -0.2547170 |
| N      | 3.2401530  | 0.9456770  | -0.5883060 |
| C      | 3.1329850  | 2.3170670  | -0.6464000 |
| O      | -2.3816450 | -2.0813880 | -2.5959800 |
| H      | -2.3252900 | -1.4818190 | -0.0350280 |
| C      | -1.6402110 | 1.2072900  | 3.3267230  |
| C      | -5.6606530 | -2.2036400 | -0.7714630 |
| C      | -4.9103610 | 0.8519690  | 0.2678250  |
| O      | -0.8152780 | 5.1871410  | 0.1907680  |
| C      | -3.6468030 | -3.6461280 | -0.7298360 |
| C      | 4.4849860  | 0.2827500  | -0.9190890 |
| C      | 5.2213960  | -0.3735940 | 0.2850820  |
| C      | 4.3350290  | -0.6158450 | -2.1477980 |
| O      | 3.3430030  | -0.7206490 | -2.8284570 |
| O      | 5.4871010  | -1.2534170 | -2.4297700 |
| O      | 4.0461680  | 3.0911070  | -0.9290490 |
| H      | -3.5451590 | -2.7300660 | 1.7385930  |
| H      | -4.6964740 | -1.4232490 | 1.8801360  |
| H      | -2.9611800 | -1.1590250 | 3.5921470  |
| H      | -1.6866680 | -1.3206170 | 2.3955380  |
| H      | -3.6578970 | 0.9895470  | 2.6441170  |
| H      | -3.3594460 | 1.6749730  | -1.7503720 |
| H      | -2.1052340 | 0.4448940  | -1.7137970 |
| H      | -3.6481700 | 0.0367290  | -3.5703230 |
| H      | -5.0295430 | 0.0040880  | -2.5067180 |
| H      | -4.3933200 | -2.2810510 | -3.0416510 |
| H      | -3.0357360 | 2.8782950  | -0.1106180 |
| H      | -2.6929540 | 3.0555770  | 1.5992570  |

|   |            |            |            |
|---|------------|------------|------------|
| H | 1.6871080  | 4.8095390  | -0.4033040 |
| H | 2.0665610  | -0.3146400 | 0.6562410  |
| H | 1.6627970  | -0.3825180 | -1.0669840 |
| H | -2.1560930 | -1.7728370 | -3.4804830 |
| H | -0.6328690 | 0.8482850  | 3.1010480  |
| H | -1.6276570 | 2.2988740  | 3.2995110  |
| H | -1.8740620 | 0.9113820  | 4.3530450  |
| H | -6.0769650 | -2.9661970 | -1.4371840 |
| H | -5.9588960 | -2.4636360 | 0.2465690  |
| H | -6.1365560 | -1.2573830 | -1.0242790 |
| H | -4.8797020 | 1.9399590  | 0.3639830  |
| H | -5.3218580 | 0.4556580  | 1.1957300  |
| H | -5.6260030 | 0.6333640  | -0.5227500 |
| H | -1.7445210 | 5.1047600  | 0.4352210  |
| H | -4.0743050 | -4.0949380 | 0.1694190  |
| H | -2.5599690 | -3.7167740 | -0.6679920 |
| H | -3.9741870 | -4.2492780 | -1.5823390 |
| H | 5.1448640  | 1.0899520  | -1.2580960 |
| H | 5.3592860  | -1.7706380 | -3.2413430 |
| H | 6.1867330  | -0.7245370 | -0.0865270 |
| H | 5.4287050  | 0.4343700  | 0.9897310  |
| C | 4.5120820  | -1.4975110 | 1.0134460  |
| C | 4.3961120  | -2.7773320 | 0.4537830  |
| C | 3.9800540  | -1.2819560 | 2.2909040  |
| C | 3.7478080  | -3.8024380 | 1.1416680  |
| H | 4.8260540  | -2.9813440 | -0.5203630 |
| C | 3.3343910  | -2.3059300 | 2.9838910  |
| H | 4.0731810  | -0.3021770 | 2.7482860  |
| C | 3.2113690  | -3.5699240 | 2.4083910  |
| H | 3.6691030  | -4.7854380 | 0.6906530  |
| H | 2.9303840  | -2.1158110 | 3.9720340  |
| H | 2.7103170  | -4.3681950 | 2.9441130  |

**Table S22.** Coordinates (Ångstroms) for conformer (2''S, 3R, 5S, 8R, 9R, 10S)-3\_C4 (Energy: -1748.9424 Hartree, Solvent: CH<sub>3</sub>OH, Boltzmann %: 0.5).

| Symbol | X          | Y          | Z          |
|--------|------------|------------|------------|
| C      | -4.0597080 | -0.0085140 | 0.0003780  |
| C      | -3.8886790 | -1.4669050 | 0.5662100  |
| C      | -4.2172770 | -1.5156740 | 2.0677970  |
| C      | -3.3253520 | -0.5558240 | 2.8589560  |
| C      | -3.3455760 | 0.8879230  | 2.3307980  |
| C      | -3.0815770 | 0.9345290  | 0.8040250  |
| C      | -3.6680670 | -0.0049200 | -1.4997350 |
| C      | -4.3776180 | -1.0925360 | -2.3138030 |
| C      | -4.1281150 | -2.4925820 | -1.7527630 |
| C      | -4.5429420 | -2.6272150 | -0.2653420 |
| O      | -1.6980940 | 0.4261630  | 0.5976770  |
| C      | -0.9139010 | 1.4255930  | 0.1337810  |
| C      | -1.5984800 | 2.6208950  | -0.0802440 |
| C      | -3.0482280 | 2.4045700  | 0.2593030  |
| C      | 0.4435730  | 1.3267210  | -0.1280610 |
| C      | 1.0901720  | 2.4672440  | -0.6067070 |
| C      | 0.4454370  | 3.6785430  | -0.8317740 |
| C      | -0.9264300 | 3.7462470  | -0.5625150 |
| C      | 1.4184400  | 0.1932400  | 0.0060660  |
| N      | 2.6708270  | 0.8205700  | -0.4301960 |
| C      | 2.5213490  | 2.1327600  | -0.8144770 |
| O      | -2.7299130 | -2.8333280 | -1.8663850 |
| H      | -2.8153660 | -1.6632520 | 0.4819860  |
| C      | -2.3783450 | 1.7524240  | 3.1546690  |
| C      | -6.0851080 | -2.6856690 | -0.1875720 |
| C      | -5.4950640 | 0.5565170  | 0.1485700  |
| O      | -1.5592450 | 4.9389910  | -0.7912080 |
| C      | -4.0254660 | -3.9878590 | 0.2590230  |
| C      | 3.9319790  | 0.1253480  | -0.5456120 |
| C      | 4.3443220  | -0.5496900 | 0.7954530  |
| C      | 3.9151160  | -0.8287190 | -1.7584380 |
| O      | 2.9934970  | -0.9169150 | -2.5302990 |
| O      | 5.0250310  | -1.5640530 | -1.9597150 |
| O      | 3.4193270  | 2.8565560  | -1.2393330 |
| H      | -4.0660260 | -2.5268440 | 2.4523970  |
| H      | -5.2700820 | -1.2769510 | 2.2481560  |
| H      | -3.6242450 | -0.5475850 | 3.9125090  |
| H      | -2.2921870 | -0.9208690 | 2.8317450  |
| H      | -4.3547960 | 1.2928850  | 2.4710620  |
| H      | -3.8912060 | 0.9669330  | -1.9495330 |
| H      | -2.5905010 | -0.1569670 | -1.5868190 |
| H      | -4.0266240 | -1.0574130 | -3.3519250 |
| H      | -5.4550480 | -0.9108240 | -2.3623110 |
| H      | -4.7090060 | -3.2244400 | -2.3307330 |
| H      | -3.6811740 | 2.5254570  | -0.6221200 |
| H      | -3.4197530 | 3.1063600  | 1.0103630  |



|   |            |            |            |
|---|------------|------------|------------|
| H | 0.9760100  | 4.5456620  | -1.2043320 |
| H | 1.4969840  | -0.1680200 | 1.0366210  |
| H | 1.1685370  | -0.6563080 | -0.6365420 |
| H | -2.4714320 | -2.7169740 | -2.7872790 |
| H | -1.3495310 | 1.3978710  | 3.0521620  |
| H | -2.4047200 | 2.8084270  | 2.8778380  |
| H | -2.6457990 | 1.6882150  | 4.2129270  |
| H | -6.4431400 | -3.5972260 | -0.6763000 |
| H | -6.4202670 | -2.7213560 | 0.8513680  |
| H | -6.5819910 | -1.8436110 | -0.6668710 |
| H | -5.5081130 | 1.6382360  | -0.0048580 |
| H | -5.9333260 | 0.3620440  | 1.1270570  |
| H | -6.1656530 | 0.1323330  | -0.5967170 |
| H | -2.4943660 | 4.8747020  | -0.5646440 |
| H | -4.4742480 | -4.2364680 | 1.2231940  |
| H | -2.9402420 | -3.9953790 | 0.3701230  |
| H | -4.2958750 | -4.7843620 | -0.4412190 |
| H | 4.6675070  | 0.8993690  | -0.7882080 |
| H | 5.6762160  | -1.4414500 | -1.2479190 |
| H | 4.1173340  | 0.1788990  | 1.5781960  |
| H | 3.7159440  | -1.4236550 | 0.9808840  |
| C | 5.8061060  | -0.9433370 | 0.8970210  |
| C | 6.8156520  | 0.0319850  | 0.8680130  |
| C | 6.1786400  | -2.2847360 | 1.0579000  |
| C | 8.1557790  | -0.3262690 | 0.9898680  |
| H | 6.5521140  | 1.0791560  | 0.7603820  |
| C | 7.5219410  | -2.6449270 | 1.1804600  |
| H | 5.4119930  | -3.0517610 | 1.0908710  |
| C | 8.5132200  | -1.6669540 | 1.1455950  |
| H | 8.9210660  | 0.4411480  | 0.9679230  |
| H | 7.7889430  | -3.6881350 | 1.3044880  |
| H | 9.5566960  | -1.9444060 | 1.2404940  |

A) Structures of the low-energy conformers of (2''S, 3R, 5S, 8R, 9R, 10S)-1

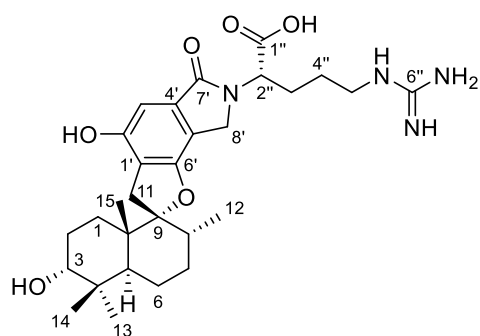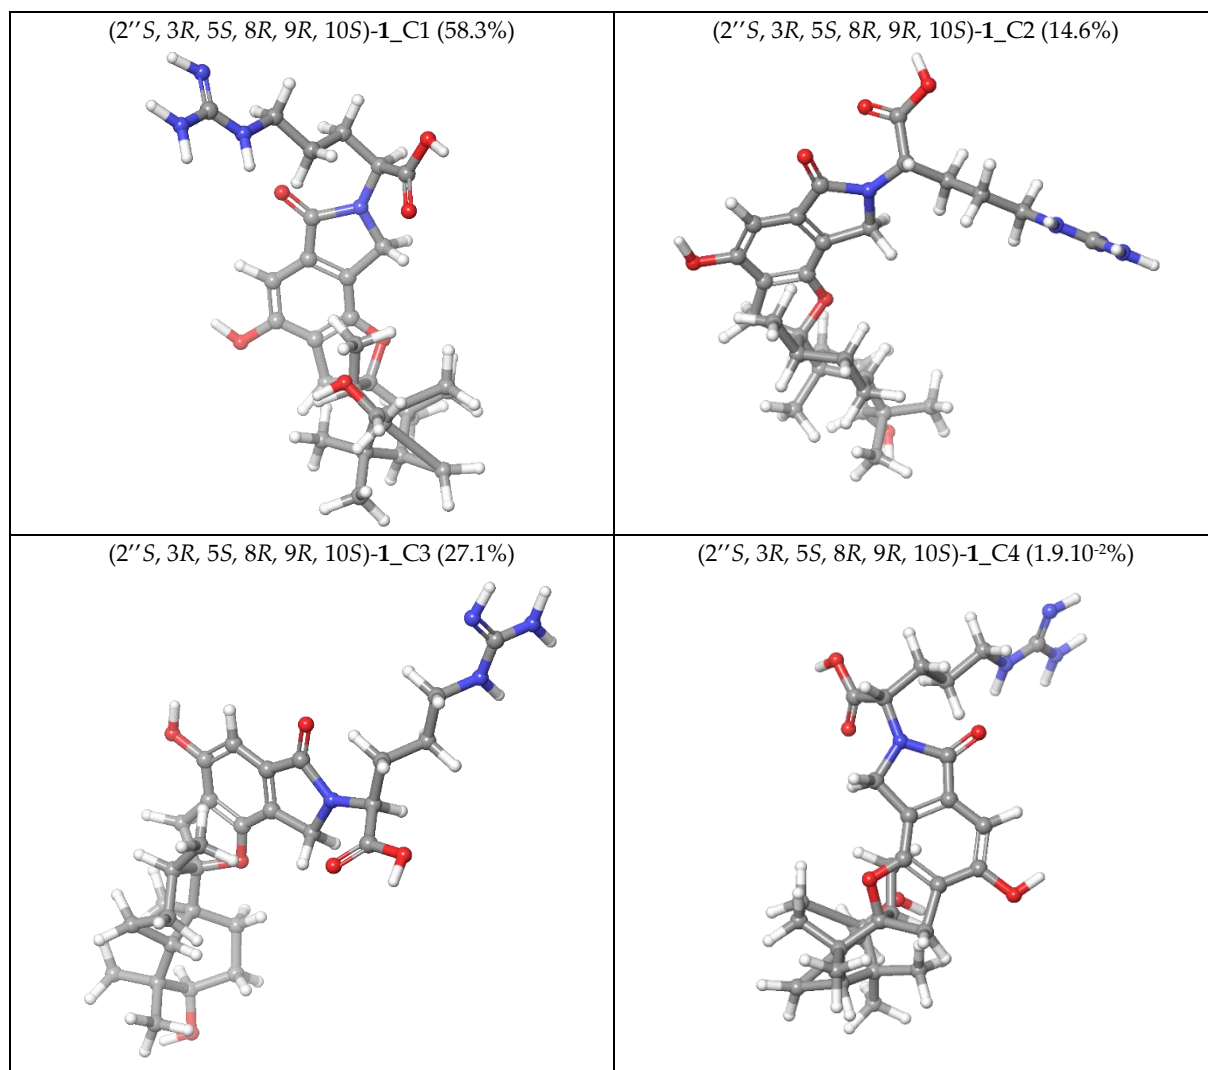

B) Structures of the low-energy conformers of (2''*R*, 10*R*, 10'*R*, 13*R*, 13'*R*, 14*S*, 14'*S*, 15*S*, 15'*S*, 18*R*, 18'*R*)-2

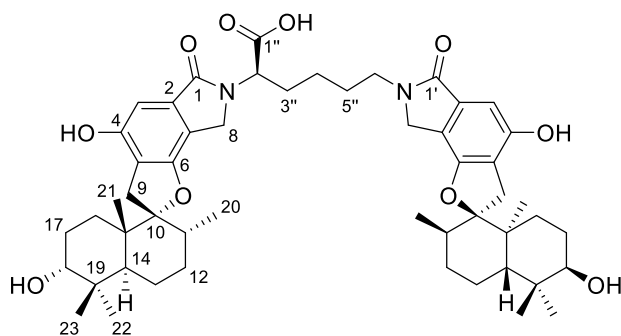

(2''*R*, 10*R*, 10'*R*, 13*R*, 13'*R*, 14*S*, 14'*S*, 15*S*, 15'*S*, 18*R*, 18'*R*)-2\_C1 (44.8%)

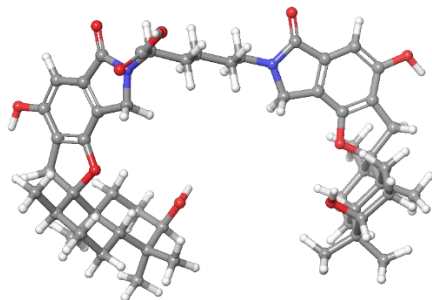

(2''*R*, 10*R*, 10'*R*, 13*R*, 13'*R*, 14*S*, 14'*S*, 15*S*, 15'*S*, 18*R*, 18'*R*)-2\_C2 (1.4%)

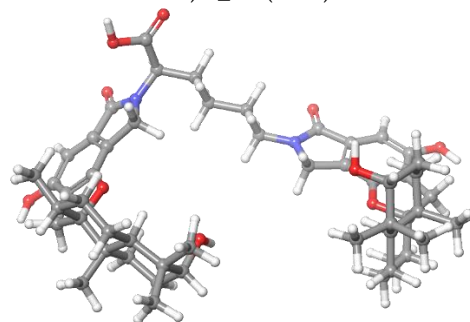

(2''*R*, 10*R*, 10'*R*, 13*R*, 13'*R*, 14*S*, 14'*S*, 15*S*, 15'*S*, 18*R*, 18'*R*)-2\_C3 (50.2%)

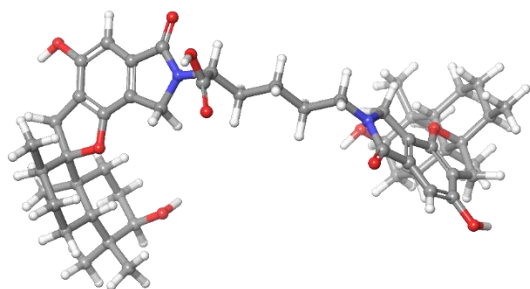

(2''*R*, 10*R*, 10'*R*, 13*R*, 13'*R*, 14*S*, 14'*S*, 15*S*, 15'*S*, 18*R*, 18'*R*)-2\_C4 (3.6%)

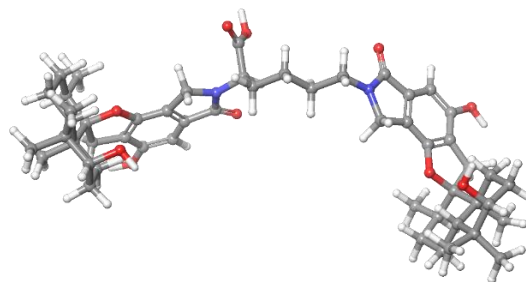

C) Structures of the low-energy conformers of (2''S, 3R, 5S, 8R, 9R, 10S)-3

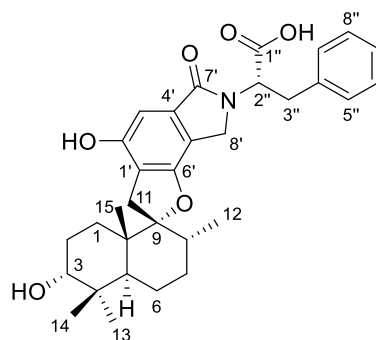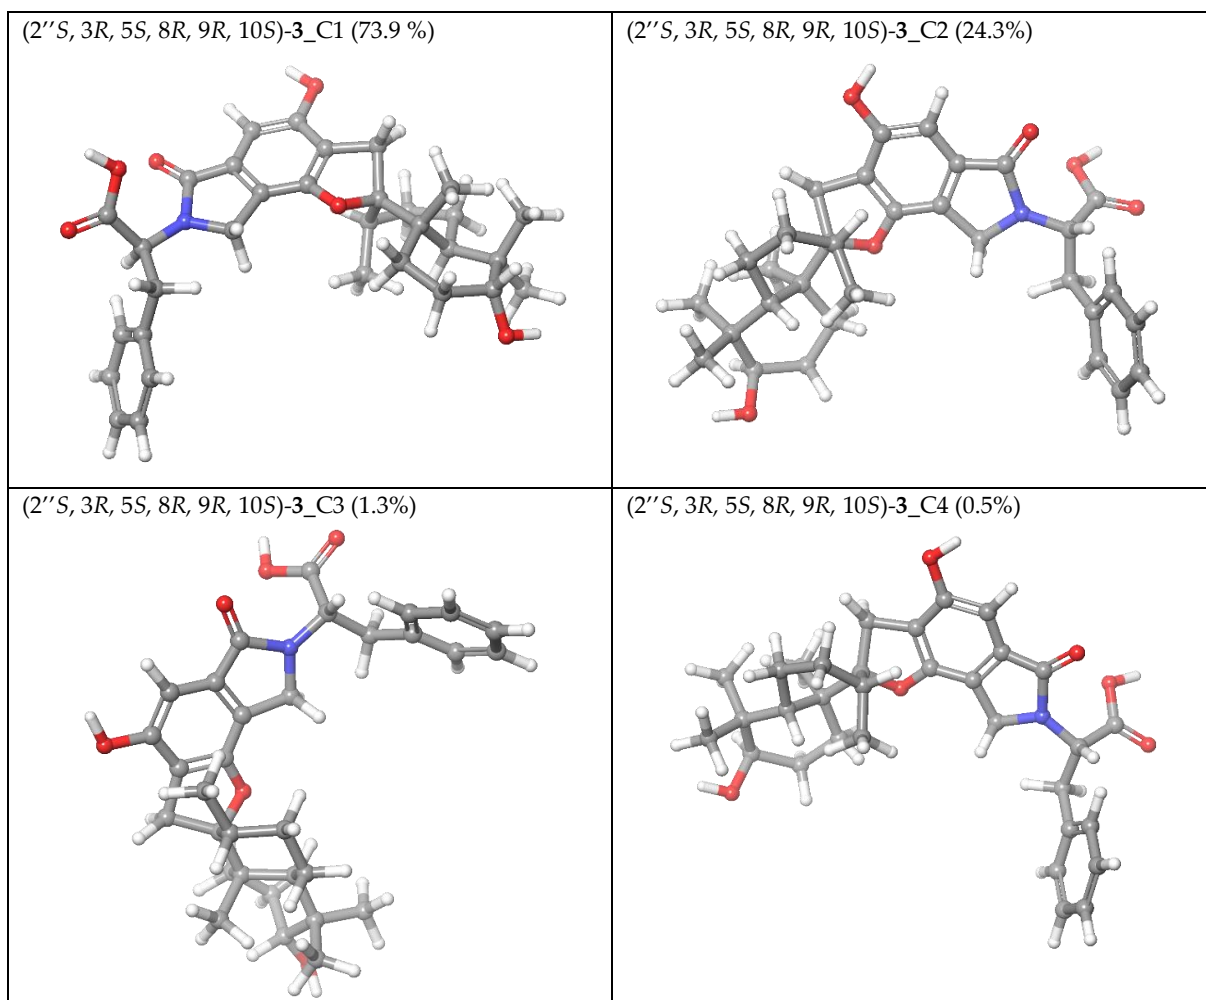

**Figure S67.** Structures of the low-energy B3LYP/6-311G(d,p) conformers of A) (2''S, 3R, 5S, 8R, 9R, 10S)-1, B) (2''R, 10R, 10'R, 13R, 13'R, 14S, 14'S, 15S, 15'S, 18R, 18'R)-2, and C) (2''S, 3R, 5S, 8R, 9R, 10S)-3 in CH<sub>3</sub>OH (298 K and 1 atm).

### 3. Molecular network annotations

**Table S23.** Molecular network annotations (isolated compounds are highlighted in blue).

| Number | Retention time (min) | <i>m/z</i> | Exact mass | $\Delta$ (ppm) | Name                                         | Adduct                                  |
|--------|----------------------|------------|------------|----------------|----------------------------------------------|-----------------------------------------|
| 1      | 20.61                | 543.3170   | 543.3177   | -1.29          | stachybotrin J                               | [M+H] <sup>+</sup>                      |
| 2      | 26.41                | 883.5077   | 883.5103   | -2.94          | stachybocin G                                | [M+H] <sup>+</sup>                      |
| 3      | 23.43                | 534.2851   | 534.3850   | 0.19           | stachybotrin I                               | [M+H] <sup>+</sup>                      |
| 4      | 20.03                | 444.2378   | 444.2381   | -0.68          | stachybotrin H                               | [M+H] <sup>+</sup>                      |
| 5      | 19.99                | 386.2323   | 386.2326   | -0.78          | stachybotrylactam                            | [M+H] <sup>+</sup>                      |
| 6      | 22.16                | 428.2418   | 428.2431   | -3.04          | stachybotrylactam acetate                    | [M+H] <sup>+</sup>                      |
| 7      | 20.69                | 486.2494   | 486.2486   | 1.65           | 2 $\alpha$ -acetoxystachybotrylactam acetate | [M+H] <sup>+</sup>                      |
| 8      | 19.57                | 430.2583   | 430.2588   | -1.16          | stachybotramide                              | [M+H] <sup>+</sup>                      |
| 9      | 20.76                | 486.2853   | 486.2850   | 0.62           | chartarlactam B                              | [M+H] <sup>+</sup>                      |
| 10     | 23.74                | 500.3019   | 500.3007   | 2.40           | F1839-J                                      | [M+H] <sup>+</sup>                      |
| 17     | 16.71                | 384.2179   | 384.2169   | 2.60           | F1839-A<br>chartarlactam E                   | [M-<br>H <sub>2</sub> O+H] <sup>+</sup> |
| 18     | 18.99                | 384.2181   | 384.2169   | 3.12           |                                              | [M+H] <sup>+</sup>                      |
|        | 19.72                | 384.2179   | 384.2169   | 2.60           |                                              |                                         |
| 19     | 17.44                | 402.2278   | 402.2275   | 0.75           | chartarlactam J                              | [M+H] <sup>+</sup>                      |
| 20     | 18.95                | 402.2280   | 402.2275   | 1.24           | chartarlactam C                              | [M+H] <sup>+</sup>                      |
| 21     | 18.86                | 386.2319   | 386.2326   | -1.81          | chartarlactam M                              | [M+H] <sup>+</sup>                      |
| 22     | 19.33                | 502.2809   | 502.2799   | 1.99           | K-76-4                                       | [M+H] <sup>+</sup>                      |
| 23     | 19.52                | 486.2847   | 486.2850   | -0.61          | stachybotrin K                               | [M+H] <sup>+</sup>                      |
| 24     | 19.76                | 488.2643   | 488.2643   | 0              | K-76-3                                       | [M+H] <sup>+</sup>                      |
| 25     | 20.33                | 472.2702   | 472.2694   | 1.69           | stachybotrysam E                             | [M+H] <sup>+</sup>                      |
| 26     | 20.86                | 550.2787   | 550.2799   | -2.18          | K-76-7                                       | [M+H] <sup>+</sup>                      |
| 27     | 20.93                | 442.2588   | 442.2588   | 0              | stachybotrin D                               | [M+H] <sup>+</sup>                      |
| 28     | 20.94                | 400.2499   | 400.2482   | 4.25           | stachybotrin E                               | [M+H] <sup>+</sup>                      |
| 29     | 21.17                | 458.2540   | 458.2537   | 0.65           | stachybonoid E                               | [M+H] <sup>+</sup>                      |
| 30     | 22.69                | 486.2850   | 486.2850   | 0              | stachybonoid F                               | [M+H] <sup>+</sup>                      |
| 31     | 22.76                | 500.3016   | 500.3007   | 1.80           | stachartin C                                 | [M+H] <sup>+</sup>                      |
| 32     | 23.04                | 373.2377   | 373.2373   | 1.07           | F1839-I                                      | [M+H] <sup>+</sup>                      |
| 33     | 24.93                | 883.5064   | 883.5103   | -4.41          | stachybocin A                                | [M+H] <sup>+</sup>                      |
